# Supplementary material for: Two-fold proton coupled electron transfer of a Ta( v ) aniline complex mediated by a redox active NNN pincer ligand
Source: Royal Society of Chemistry journal article supplement (doi:10.1039/d4dt03281k), 2024-12-18
Supplement: d4dt03281k1.pdf [file d4dt03281k1.pdf]

## SUPPLEMENTARY INFORMATION

### **Two-fold proton coupled electron transfer of a Ta(V) aniline complex mediated by a redox active NNN pincer ligand**

Sotirios Pavlidis,<sup>a</sup> Jasmin Alasadi,<sup>a</sup> Amanda Opis-Basilio<sup>a</sup> and Josh Abbenseth<sup>\*a</sup>

<sup>a</sup> Institut für Chemie, Humboldt-Universität zu Berlin, Brook-Taylor-Str. 2, 12489 Berlin, Germany. E-Mail: [josh.abbenseth@hu.berlin.de](mailto:josh.abbenseth@hu.berlin.de)

# Table of content

|                                                                                      |     |
|--------------------------------------------------------------------------------------|-----|
| Synthetic Procedures .....                                                           | S3  |
| Ligand Synthesis .....                                                               | S3  |
| Multi-step synthesis of 2,7,9,9-tetramethyl-9,10-dihydro-acridine ( <b>A</b> ) ..... | S3  |
| Synthesis of <b>B</b> .....                                                          | S4  |
| Synthesis of <b>C</b> .....                                                          | S4  |
| Synthesis of <b>D</b> .....                                                          | S4  |
| Synthesis of <sup>H3</sup> NNN <sup>cat</sup> .....                                  | S5  |
| Spectroscopic data (Ligand synthesis).....                                           | S6  |
| Further reactions of Ta coordination compounds .....                                 | S9  |
| <b>3</b> + TEMPOH .....                                                              | S9  |
| <b>1</b> + diazobenzene .....                                                        | S9  |
| <b>3</b> + CoCp <sub>2</sub> .....                                                   | S9  |
| <b>3</b> + KC <sub>8</sub> in presence of 222-crypt .....                            | S9  |
| <b>3</b> + Brookhart's acid .....                                                    | S10 |
| Spectroscopic Data (Synthesis and reactivity of Ta coordination compounds) .....     | S11 |
| Cyclic Voltammetry .....                                                             | S26 |
| Single Crystal X-ray Diffraction .....                                               | S28 |
| Crystallographic details of <b>3</b> .....                                           | S28 |
| Crystallographic details of <b>4</b> .....                                           | S32 |
| Crystallographic Details of <b>5</b> .....                                           | S38 |
| Computational Details.....                                                           | S45 |
| References .....                                                                     | S47 |

## Synthetic Procedures

### Ligand Synthesis

The synthesis of compounds **A** – <sup>H3</sup>NNN<sup>cat</sup> follows a published procedure with several modifications on a larger scale.<sup>[1-4]</sup>

#### Multi-step synthesis of 2,7,9,9-tetramethyl-9,10-dihydro-acridine (**A**)

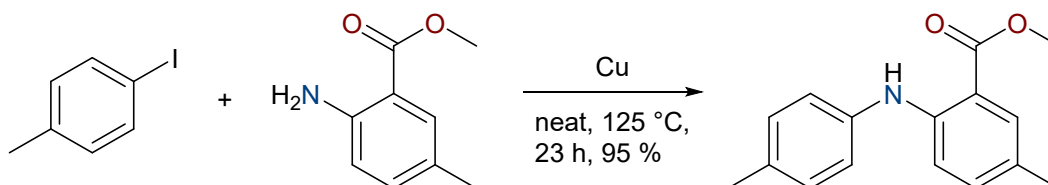

Methyl 2-amino-5-methyl benzoate (12.0 g, 72.6 mmol, 1.0 eq.), 4-Iodotoluene (15.8 g, 72.6 mmol, 1.0 eq.), K<sub>2</sub>CO<sub>3</sub> (10.0 g, 72.6 mmol, 1.0 eq.) and copper powder (690 mg, 10.9 mmol, 15 mol%) are added into a pressure tube and set under argon atmosphere. The reaction mixture is stirred at 125 °C for 23 h. The bright brown reaction suspension is cooled to 25 °C and diluted with an CHCl<sub>3</sub> / H<sub>2</sub>O mixture followed by extraction with CHCl<sub>3</sub> (4 x 50 mL), washed with brine (4 x 50 mL), the combined organic phases are dried over MgSO<sub>4</sub>. Filtration and removing the solvent under reduced pressure leads to a yellow oil (17.6 g, 68.8 mmol, 95%)

<sup>1</sup>H NMR spectra matched published spectra.<sup>[5]</sup>

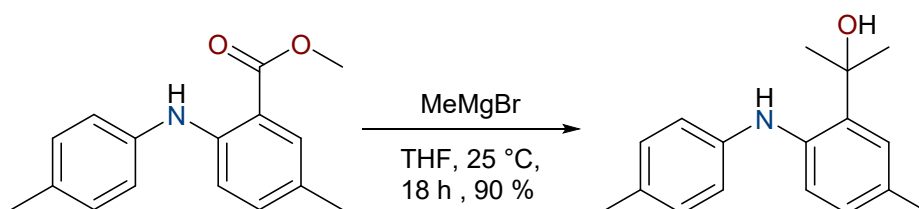

The above obtained oil (17.6 g, 68.8 mmol, 1.0 eq.) is set under argon atmosphere, dissolved in dry THF (200 mL) and cooled to 0 °C. While stirring the amber coloured solution, MeMgBr (100 mL, 3 M in Et<sub>2</sub>O, 4.4 eq.) is added dropwise. The bright orange reaction mixture is slowly warmed to 25 °C and stirred for 18 h. To quench residual Mg organyls as well as hydrolyse the compound, the reaction mixture is cooled to 0 °C and quenched with water (5.40 mL) then with HCl (300 mL, 2 M). The resulting bright orange solution is extracted with Et<sub>2</sub>O (4 x 30 mL), washed with brine (4 x 50 mL) and the combined organic phases are dried over MgSO<sub>4</sub>, filtration and removing the solvent under reduced pressure leads to a yellow / brown oil (15.8 g, 61.9 mmol, 90%)

<sup>1</sup>H NMR spectra matched published spectra.<sup>[5]</sup>

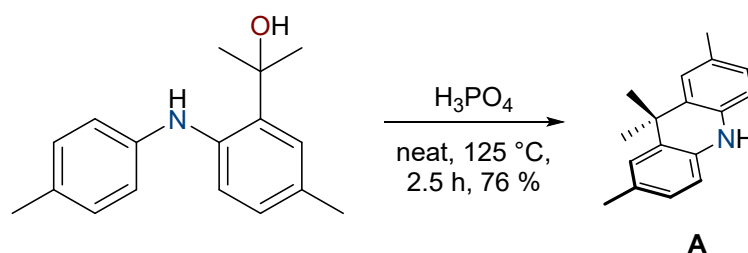

The above obtained oil (15.8 g, 61.9 mmol, 1.0 eq.) is suspended in H<sub>3</sub>PO<sub>4</sub> (85 %, 60 mL) and heated to 125 °C for 2.5 h. Afterwards the reaction solution is cooled to 0 °C and diluted with water and Et<sub>2</sub>O followed by extraction with Et<sub>2</sub>O (4 x 30 mL). The aqueous phase and organic phases are collected separately. The aqueous phase is neutralized with NaOH (580 mL, 3 M) until a pH of 7-8 is reached and further extracted with Et<sub>2</sub>O (4 x 30 mL). The combined organic phases are washed with water (100 mL) and brine (3 x 50 mL), dried over MgSO<sub>4</sub> and the solvent is removed under reduced pressure. 9,10-Dihydro-2,7,9,9-tetramethylacridine (**A**) is obtained as a red waxy solid (13.1 g, 55.0 mmol, 76%)

<sup>1</sup>H NMR spectra matched published spectra.<sup>[5]</sup>

### Synthesis of B

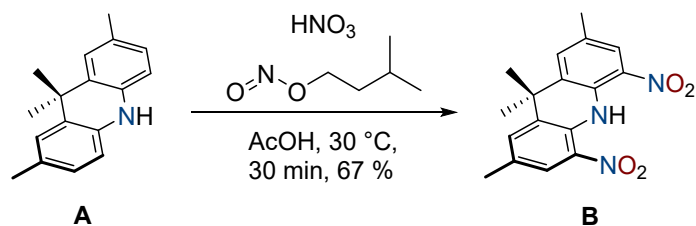

**A** (2.00 g, 8.43 mmol, 1.0 eq.) is dissolved in AcOH (150 mL). While stirring, HNO<sub>3</sub> (68%, 4 mL) is added quickly followed by a dropwise addition of isopentyl nitrite (3.4 mL, 25.3 mmol, 3.0 eq.). The bright red suspension is stirred for 30 min at 25 °C followed by filtration over a Büchner funnel and washing with water (400 mL). **B** is obtained as a partially crystalline red powder (1.86 g, 5.68 mmol, 67%).

<sup>1</sup>H NMR spectra matched published spectra.<sup>[3]</sup>

### Synthesis of C

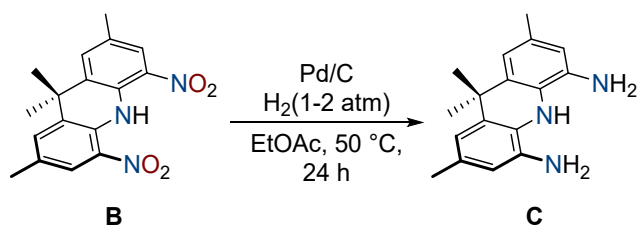

**B** (1.05 g, 3.21 mmol, 1.00 eq.) and Pd/C (10 w%, 0.154 mmol, 5 mol%) are suspended in EtOAc (40 mL) under aerobic conditions. The reaction suspension is degassed with three freeze-pump-thaw cycles, backfilled with H<sub>2</sub> (2 atm, exc.) and stirred for 24 h at 50 °C. The slightly yellow solution is filtered into a new Schlenk flask and the solvent is removed under reduced pressure. **C** is obtained as a light-yellow solid (823.5 mg, 3.08 mmol, 96%).

<sup>1</sup>H NMR spectra matched published spectra.<sup>[3]</sup>

### Synthesis of D

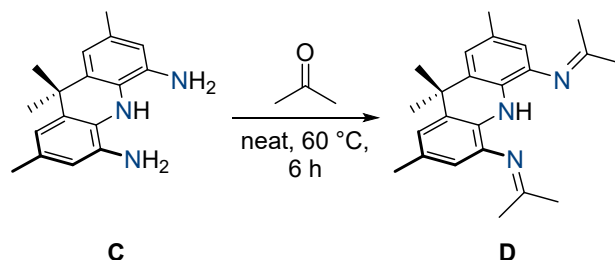

**C** (825 mg, 3.09 mmol, 1.0 eq.) and MgSO<sub>4</sub> (1.03 g, 8.59 mmol, 2.8 eq.) are suspended in freshly distilled and degassed acetone (25 mL) under inert conditions. The slightly yellow reaction suspension is heated to 60 °C and refluxed for 6 h. After cooling the reaction solution to 25 °C the solution is filtered into a new flask and the solvent is removed under reduced pressure. **D** is obtained as a yellow waxy solid that is directly used for the synthesis of <sup>H3</sup>NNN<sup>cat</sup>.

NMR: (C<sub>6</sub>D<sub>6</sub>, 25 °C): <sup>1</sup>H (400 MHz) δ (ppm): 7.08 – 7.03 (m, 2H, C<sub>3/11</sub>CH), 6.97 (s, 1H, NH), 6.37 (dd, *J* = 1.9, 0.8 Hz, 2H, C<sub>5/9</sub>H), 2.28 (s, 6H, C<sub>20/23</sub>H<sub>3</sub>), 2.00 (s, 6H, C<sub>15/18</sub>CH<sub>3</sub>), 1.67 (s, 6H, C<sub>21/22</sub>H<sub>3</sub>), 1.50 (s, 6H, C<sub>16/19</sub>CH<sub>3</sub>).

NMR: (C<sub>6</sub>D<sub>6</sub>, 25 °C): <sup>13</sup>C{<sup>1</sup>H} (75 MHz) δ (ppm) = 170.35 (C<sub>14/17</sub>), 136.38 (C<sub>1/13</sub>), 129.70 (C<sub>4</sub>), 129.16 (C<sub>7</sub>), 128.50 (C<sub>2/12</sub>), 121.34 (C<sub>3/11</sub>), 117.82 (C<sub>5/9</sub>), 37.12 (C<sub>6/8</sub>), 30.45 (C<sub>21/22</sub>), 28.47 (C<sub>15/18</sub>), 21.47 (C<sub>20/23</sub>), 20.31 (C<sub>16/19</sub>).

### Synthesis of $\text{H}^3\text{NNN}^{\text{cat}}$

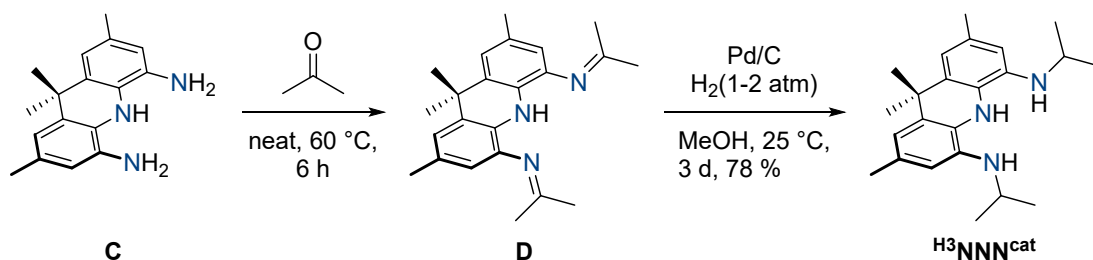

To **C** (825 mg, 3.09 mmol, 1.0 eq.) Pd/C (10 w%, 0.305 mmol, 10 mol%) is added in an argon counter flow. The substrates are suspended in dry MeOH (20 mL) and acetone (100  $\mu\text{l}$ , 13.5 mmol, 4.4 eq.) is added. The reaction mixture is degassed, backfilled with  $\text{H}_2$  and stirred for 3 d at 30  $^\circ\text{C}$ . Filtration of the colourless solution into a new flask and removing solvent under reduced pressure gives an off-white powder (842.8 mg, 2.40 mmol, 78%).

$^1\text{H}$  NMR spectra matched published spectra.<sup>[9]</sup>

### Spectroscopic data (Ligand synthesis)

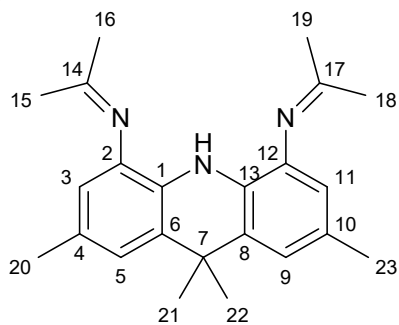

**Scheme S1.** Carbon numbering of the NNN Ligand for NMR signal assignment.

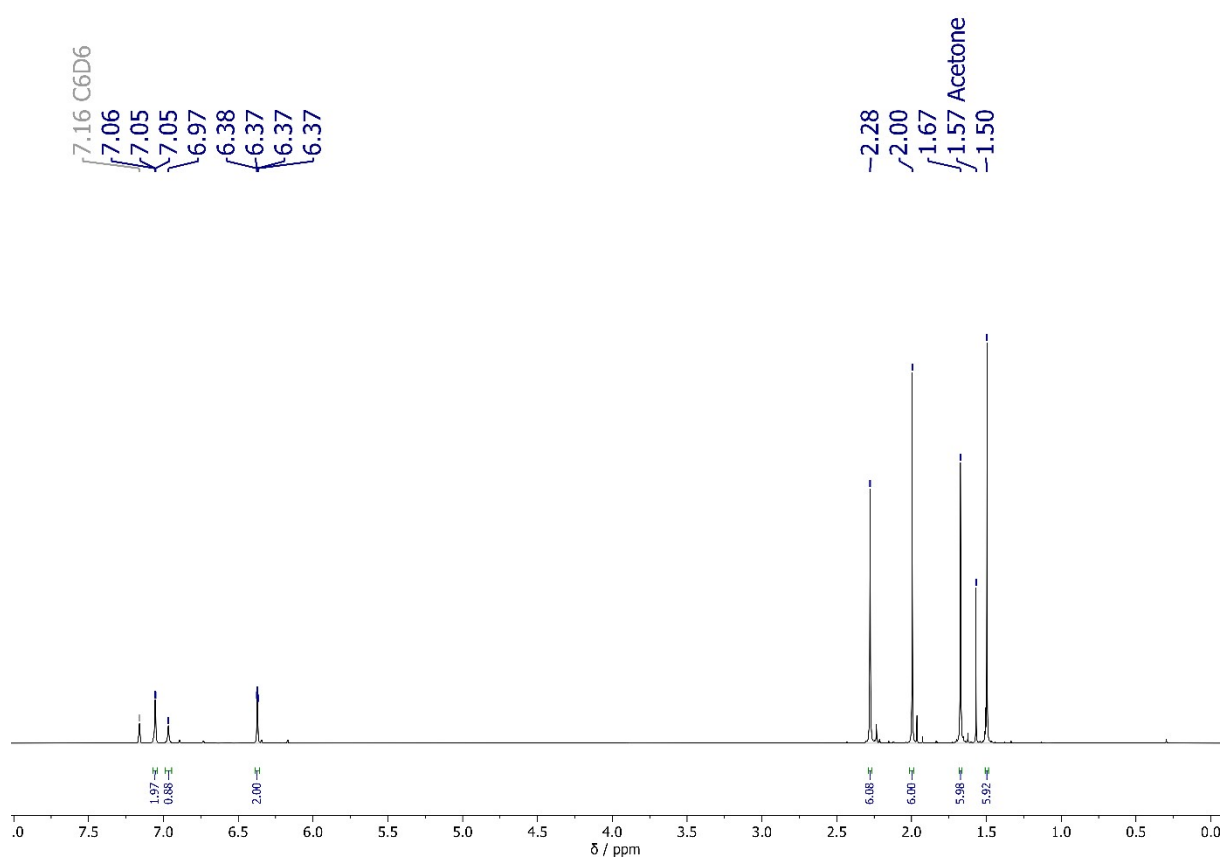

**Figure S1.**  $^1\text{H}$  NMR spectrum of **D**,  $\text{C}_6\text{D}_6$ , 25  $^\circ\text{C}$ .

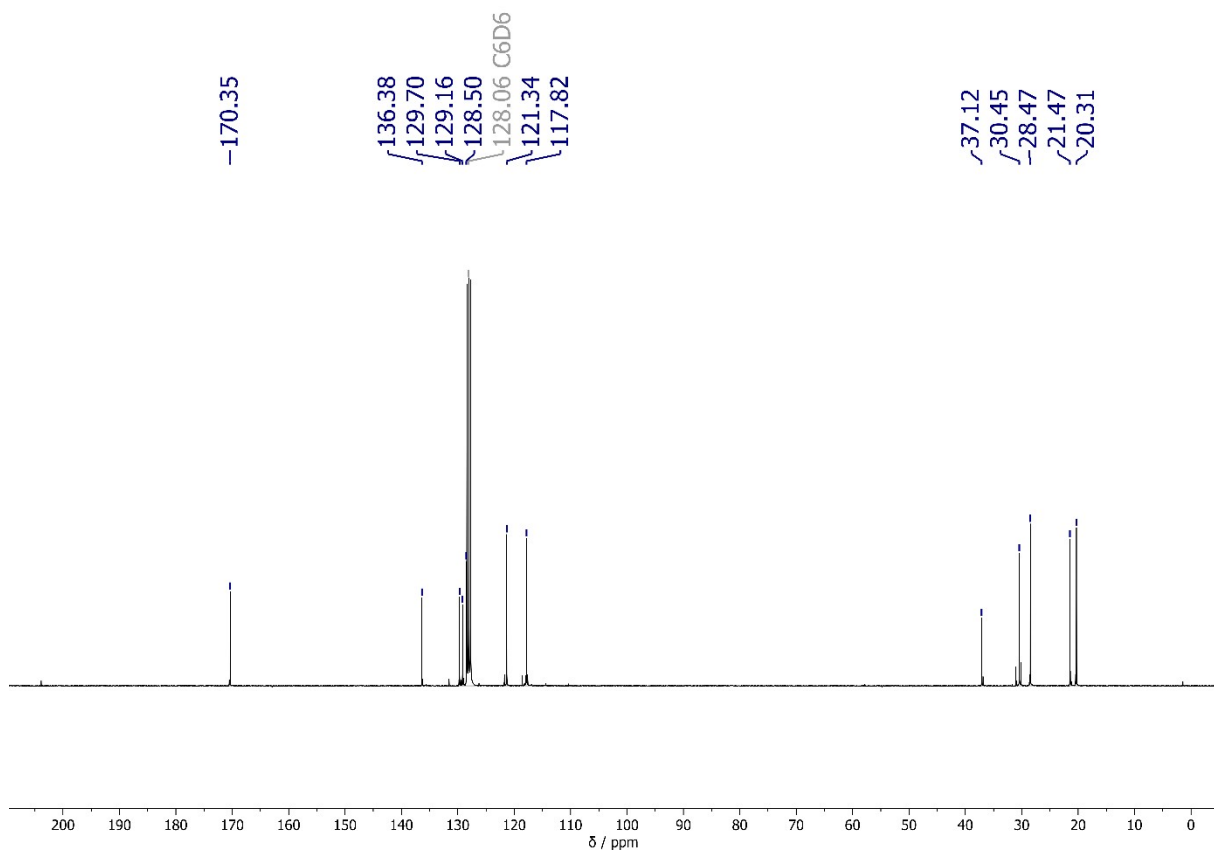

**Figure S2.**  $^{13}\text{C}\{^1\text{H}\}$  NMR spectrum of **D**,  $\text{C}_6\text{D}_6$ , 25 °C.

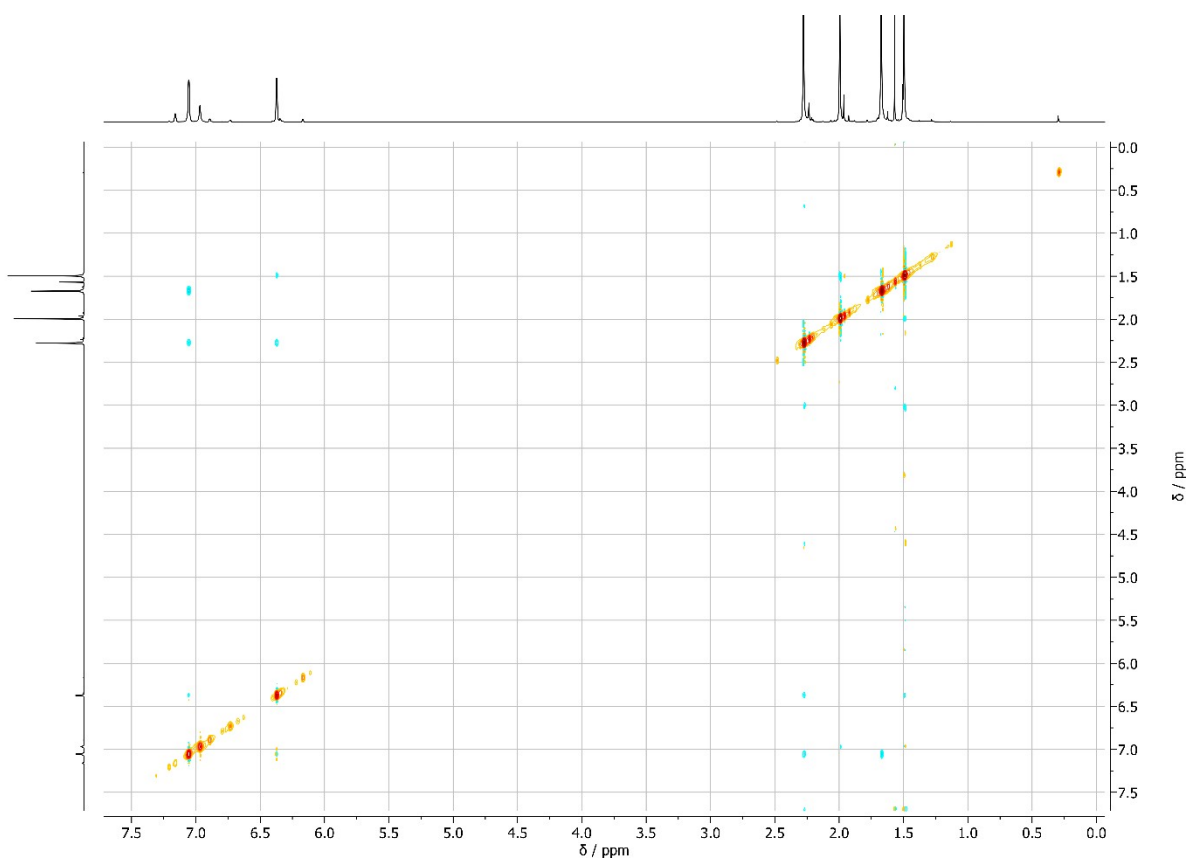

**Figure S3.** HSQC spectrum of **D**,  $\text{C}_6\text{D}_6$ , 25 °C.

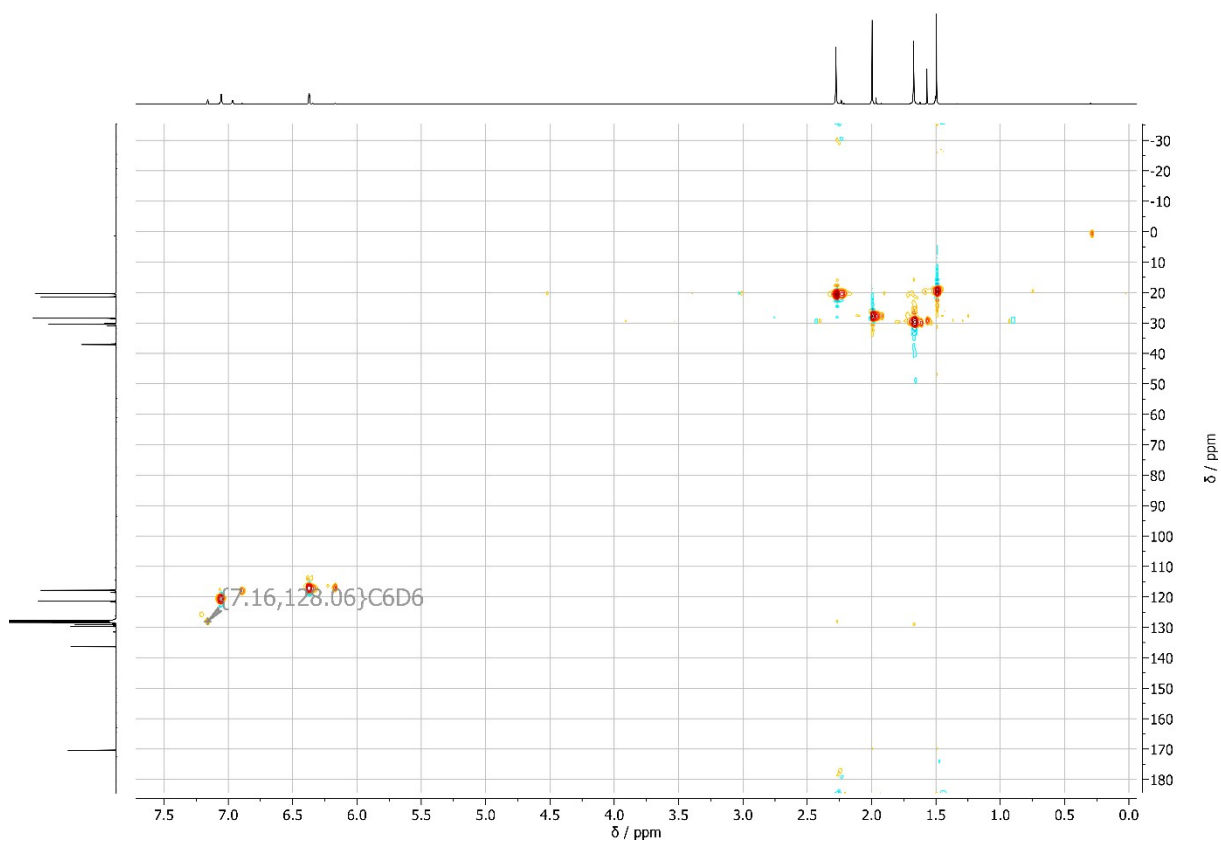

**Figure S4.** HMBC spectrum of **D**, C<sub>6</sub>D<sub>6</sub>, 25 °C.

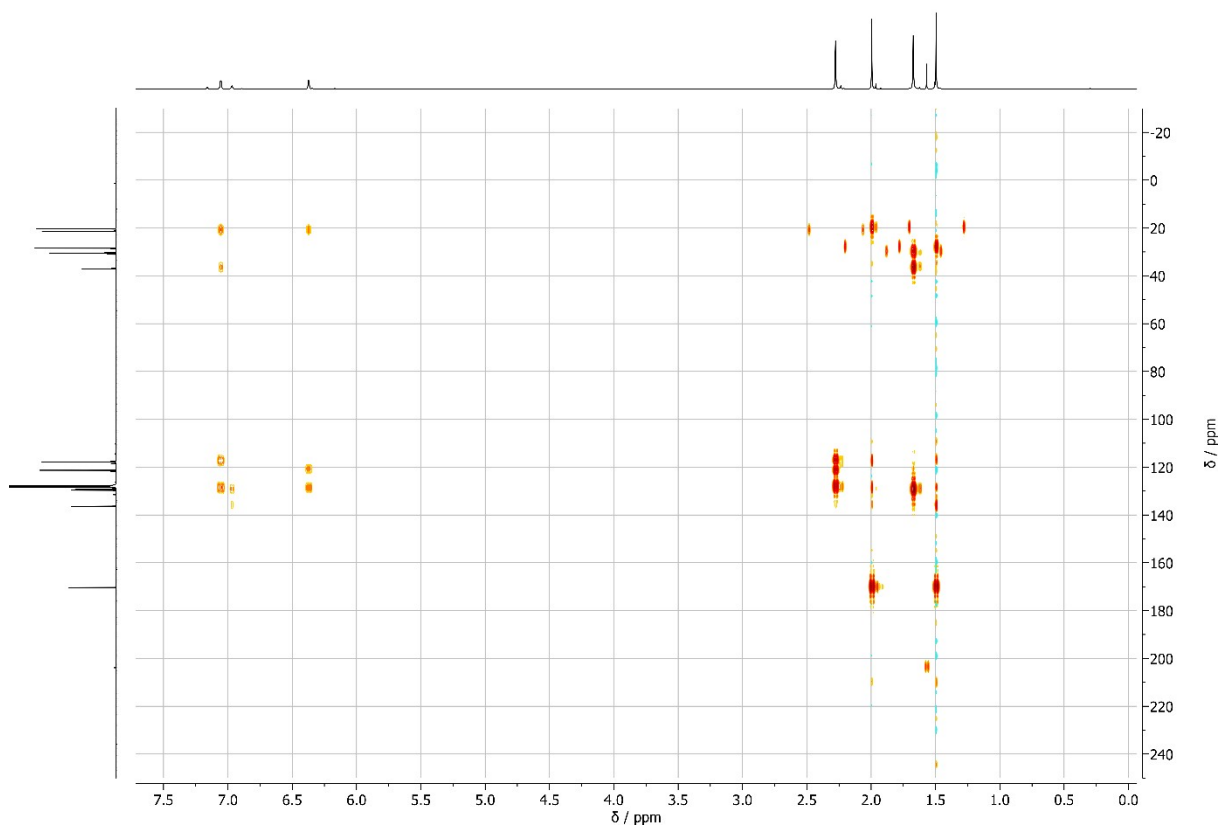

**Figure S5.** NOESY spectrum of **D**, C<sub>6</sub>D<sub>6</sub>, 25 °C.



## Further reactions of Ta coordination compounds

### 3 + TEMPOH

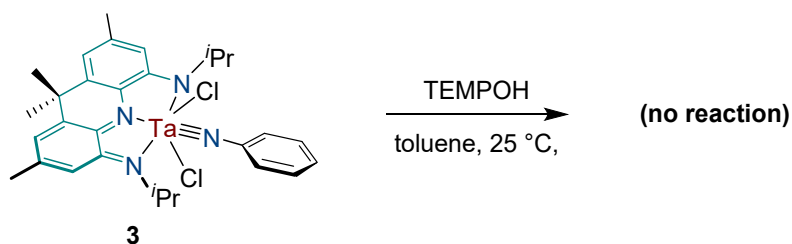

To a solution of **3** (10 mg, 14.5  $\mu\text{mol}$ , 1.0 eq.) toluene- $d_8$  TEMPOH (4.6 mg, 28.9  $\mu\text{mol}$ , 2.0 eq.) is added and examined via NMR-spectroscopy.

### 1 + diazobenzene

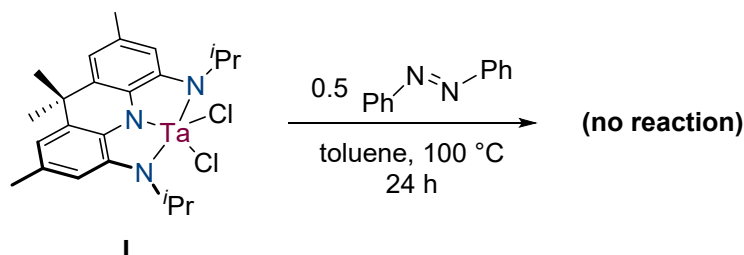

$\text{H}^3\text{NNN}^{\text{cat}}$  (10.0 mg, 28.5  $\mu\text{mol}$ , 1.0 eq.) is dissolved in toluene- $d_8$  (0.3 mL) and added to a solution of  $\text{TaMe}_3\text{Cl}_2$  (8.5 mg, 28.45  $\mu\text{mol}$ , 1.0 eq.) in toluene (0.2 mL). Heating the reaction solution to 100 °C for 1 h results in gas evolution and a bright red colour. Azobenzene (2.6 mg, 14.3  $\mu\text{mol}$ , 0.5 eq.) is added to the reaction mixture, after 30 min at 34 °C no colour change was observed. The reaction mixture is heated for 24 h at 100 °C. No conversion of the substrate could be observed in the  $^1\text{H-NMR}$ .

### 3 + $\text{CoCp}_2$

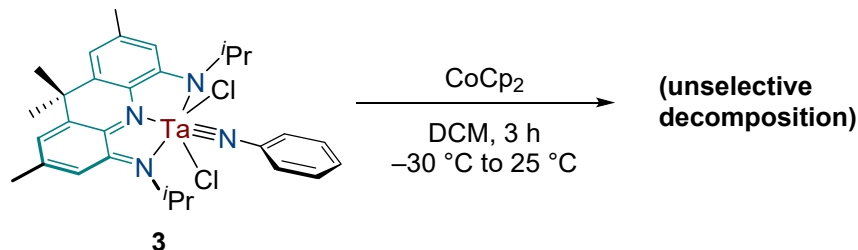

$\text{CoCp}_2$  (3.9 mg, 20.6  $\mu\text{mol}$ , 0.95 eq.) is added into a J-Young flask and dissolved in DCM (2 mL), **3** (15 mg, 21.7  $\mu\text{mol}$ , 1.0 eq.) is dissolved in a separate flask and added dropwise to the stirring  $\text{CoCp}_2$  solution. After stirring the reaction mixture for 3 h at 25 °C the solvent is removed and re-dissolved in  $\text{DCM-d}_2$ . The  $^1\text{H-NMR}$  shows unselective decomposition of the compound (See **Figure S26**).

### 3 + $\text{KC}_8$ in presence of 222-crypt

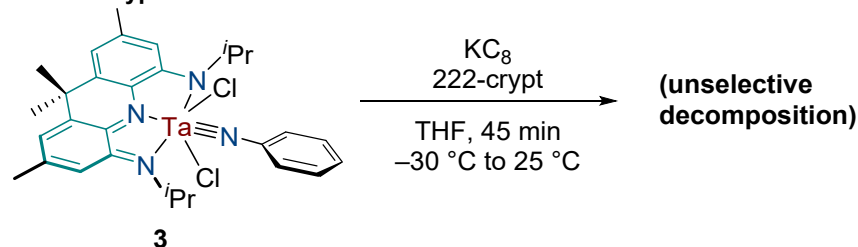

**3** (20.0 mg, 28.9  $\mu\text{mol}$ , 1 eq.) and 4,7,13,16,21,24-Hexaoxa-1,10-diazabicyclo[8.8.8]hexacosan (222-crypt) (10.9 mg, 28.9  $\mu\text{mol}$ , 1 eq.) are dissolved in THF and cooled for 10 min to -30 °C.  $\text{KC}_8$  is added to the stirring cold solution and slowly warmed to 25 °C. After stirring for 45 min the reaction solution is filtrated, the solvent removed under reduced pressure and re-dissolved in THF- $d_8$ . The  $^1\text{H-NMR}$  shows unselective decomposition the compound (See **Figure S27**).

### 3 + Brookhart's acid

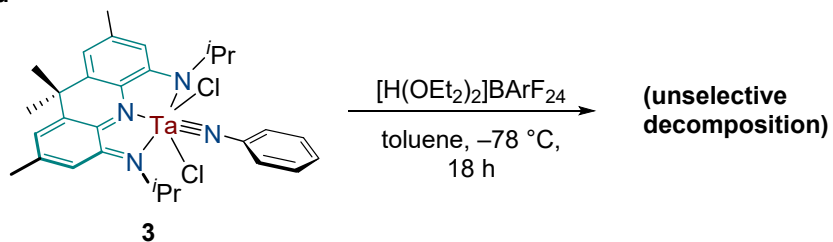

**3** (20 mg, 28.9  $\mu\text{mol}$ , 1.0 eq.) is added to J-Young flask and dissolved in toluene.  $[\text{H}(\text{OEt}_2)_2][\text{BArF}_{24}]$  (29.3 mg, 28.9  $\mu\text{mol}$ , 1.0 eq.) is dissolved in  $\text{Et}_2\text{O}$  in a separate Schlenk flask. The flask containing the Tantalum-complex is cooled to  $-78\text{ }^\circ\text{C}$  for 5 min and the solution containing the Brookhart's acid is slowly added to the stirring cooled solution. After stirring for 15 min at  $-78\text{ }^\circ\text{C}$  the reaction solution is slowly warmed to  $25\text{ }^\circ\text{C}$ . The solvent is removed under reduced pressure. The dark violet oil is washed with hexane (3 x 5 mL), residual solvent is removed under reduced pressure and the violet oil is re-dissolved in  $\text{THF-d}_8$ . The  $^1\text{H-NMR}$  shows unselective decomposition of the compound (See **Figure S28**).

Spectroscopic Data (Synthesis and reactivity of Ta coordination compounds)  
VT-NMR of complex I

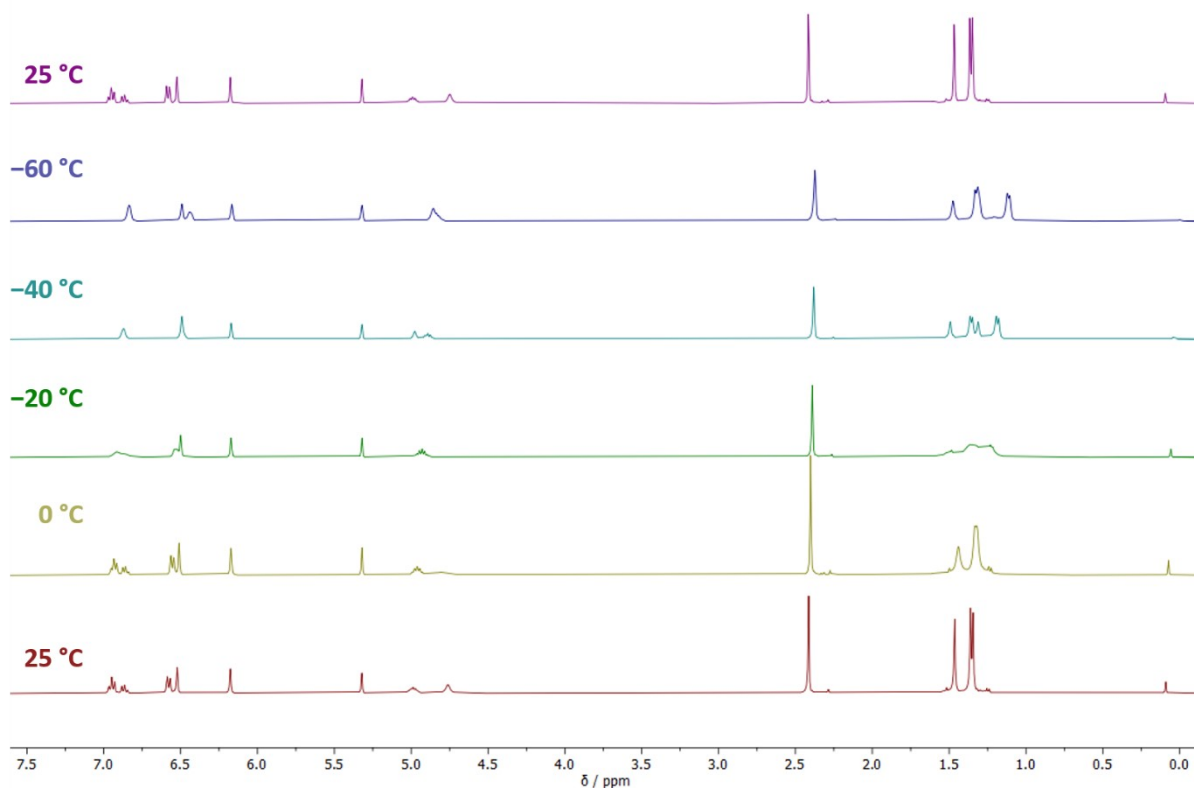

Figure S6. <sup>1</sup>H VT-NMR spectrum of I + 1 eq. of aniline, CD<sub>2</sub>Cl<sub>2</sub>, 25 °C to -60 °C.

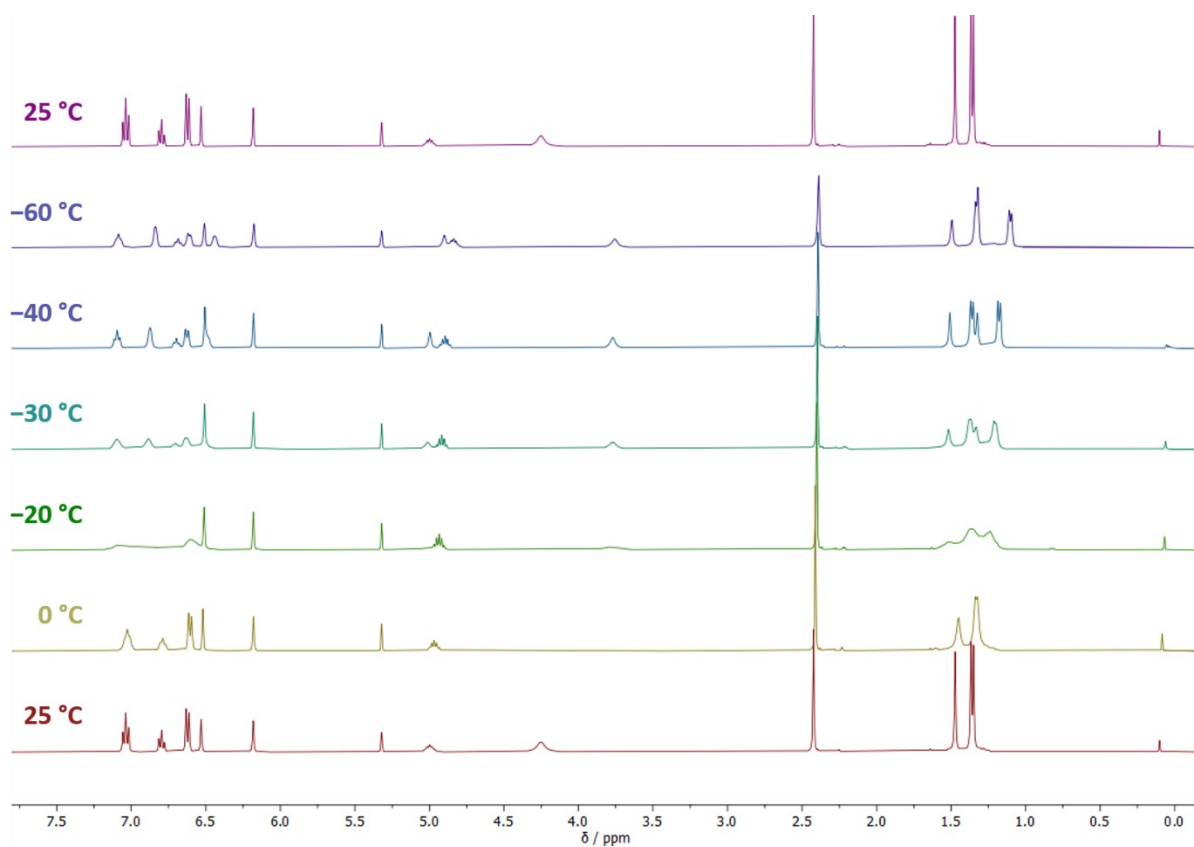

Figure S7. <sup>1</sup>H VT-NMR spectrum of I + 2 eq. of aniline, CD<sub>2</sub>Cl<sub>2</sub>, 25 °C to -60 °C.

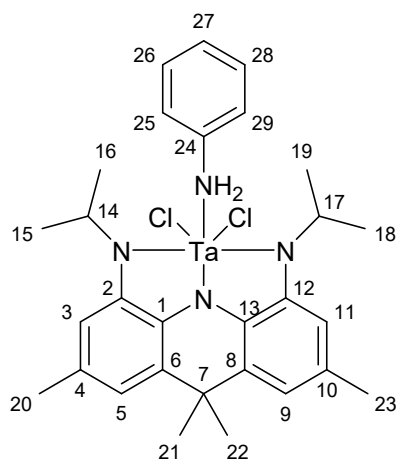

**Scheme S2.** Carbon numbering of **1** for clarification of NMR signal assignment. Assignment of the proton signals is conducted using the  $^1\text{H}$  NMR at  $-40\text{ }^\circ\text{C}$  showing the best peak separation as well as coupling.

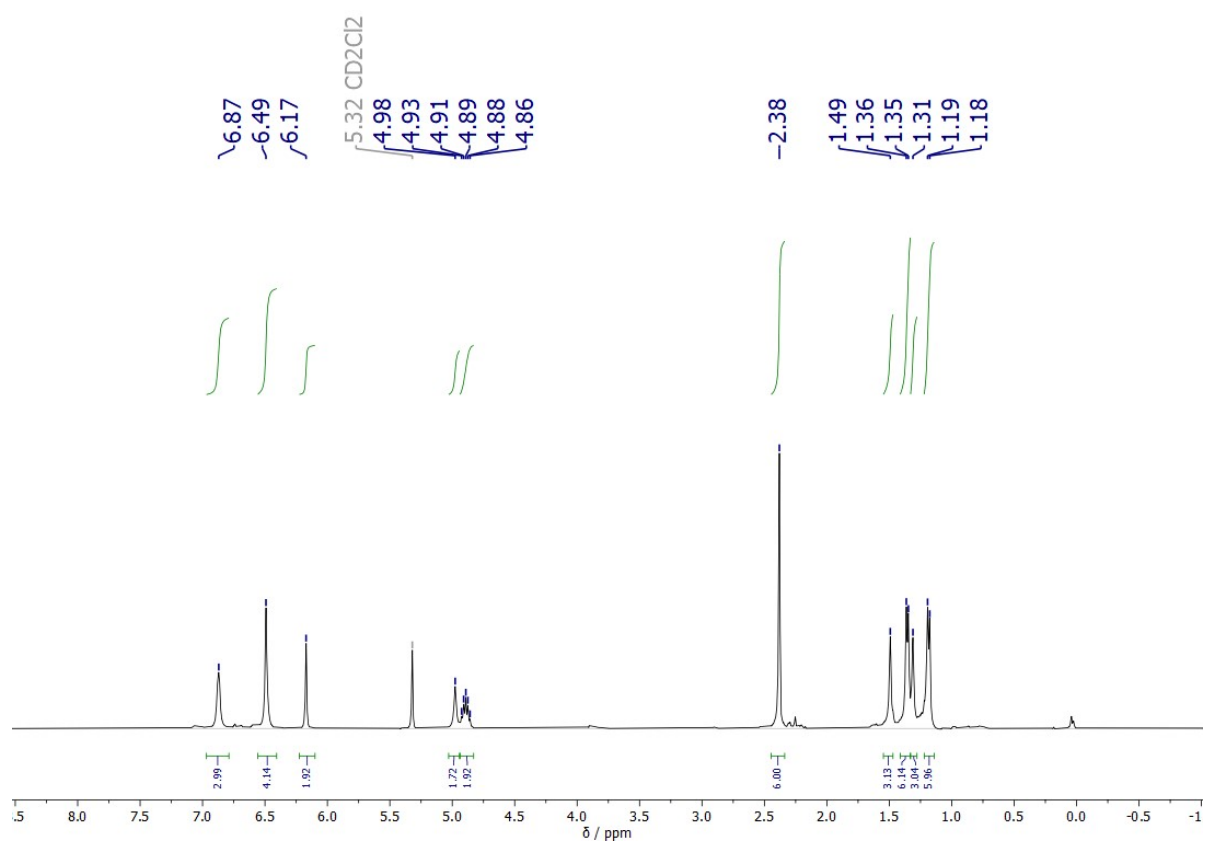

**Figure S8.**  $^1\text{H}$  NMR spectrum of **1**,  $\text{CD}_2\text{Cl}_2$ ,  $-40\text{ }^\circ\text{C}$ .

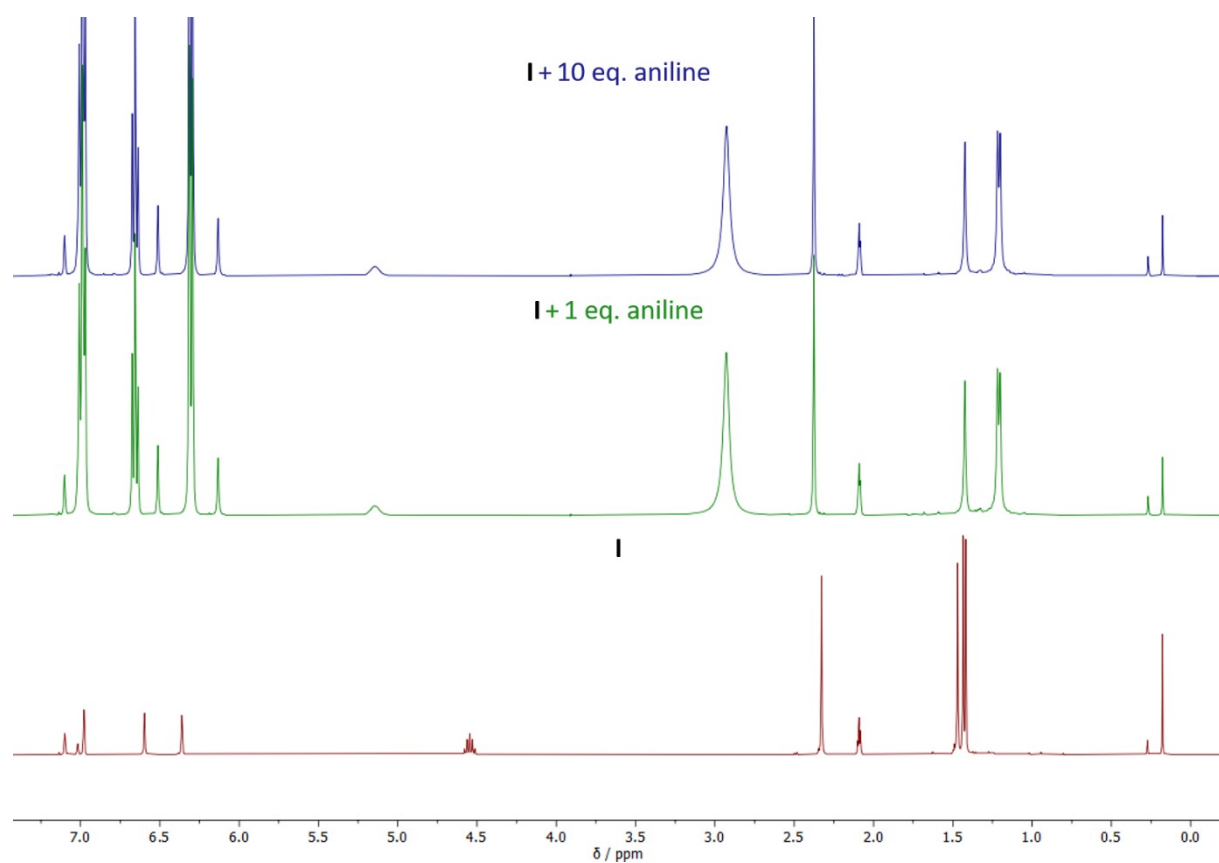

**Figure S9.**  $^1\text{H-NMR}$  spectrum of **I** with 1 eq. and 10 eq. of aniline. Signal at  $\delta_{\text{H}} = 0.17$  ppm corresponds to methane originating from the freshly prepared solution of **I**,  $\text{tol-d}_8$ , 25  $^\circ\text{C}$ .

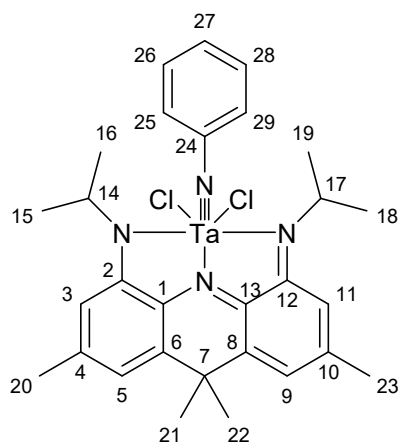

**Scheme S3.** Carbon numbering of **3** for clarification of NMR signal assignment. The experimental bond distances indicate that both arms of the NNN pincer ligand exhibit identical C–C and C–N bond lengths, preserving symmetry even upon one- or two-electron ligand-centred oxidation. To clearly illustrate the ligand-centred oxidation in the Ta complexes, we chose to represent the chemical structures with asymmetrical ligands, enhancing the visual communication of this feature to the reader.

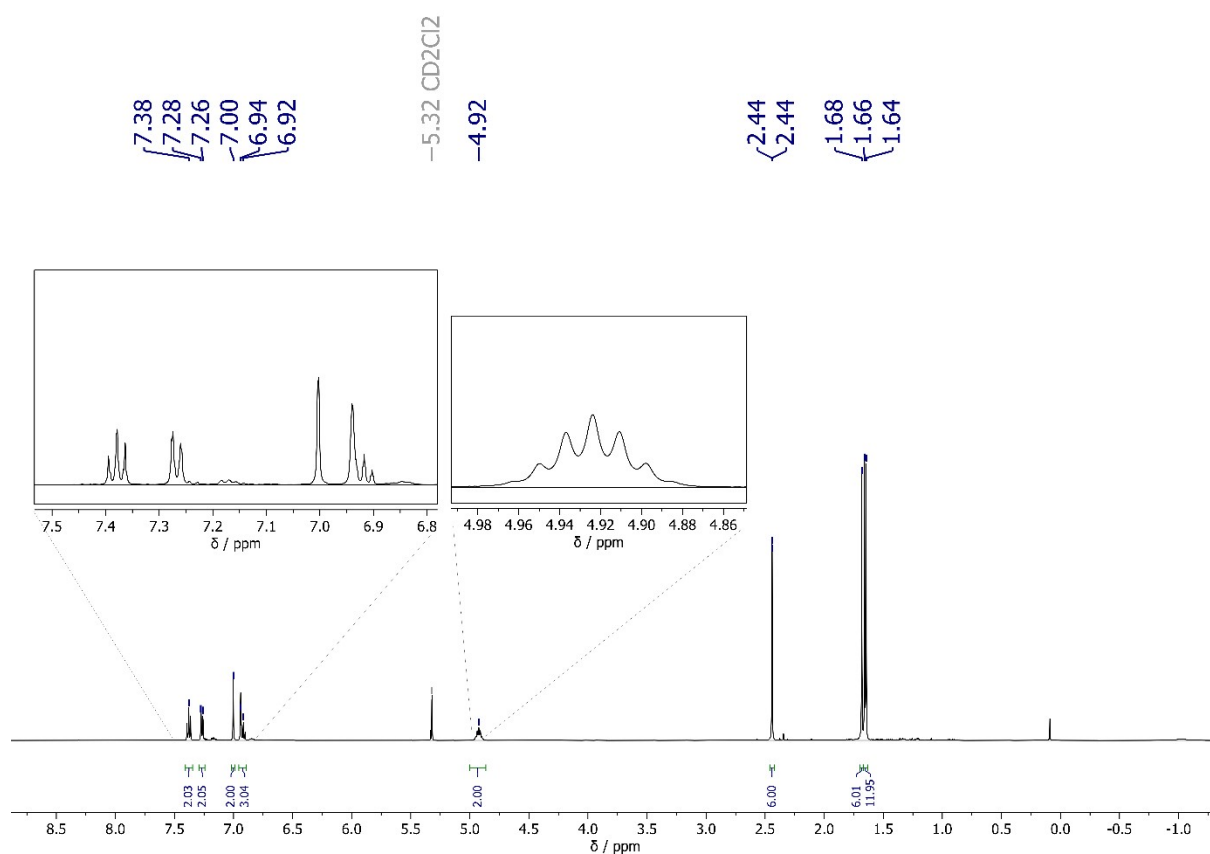

**Figure S10.**  $^1\text{H}$  NMR spectrum of **3**,  $\text{CD}_2\text{Cl}_2$ , 25  $^\circ\text{C}$ , inset: heptett of  $\text{C}_{14/17}\text{H}$  and aromatic region.

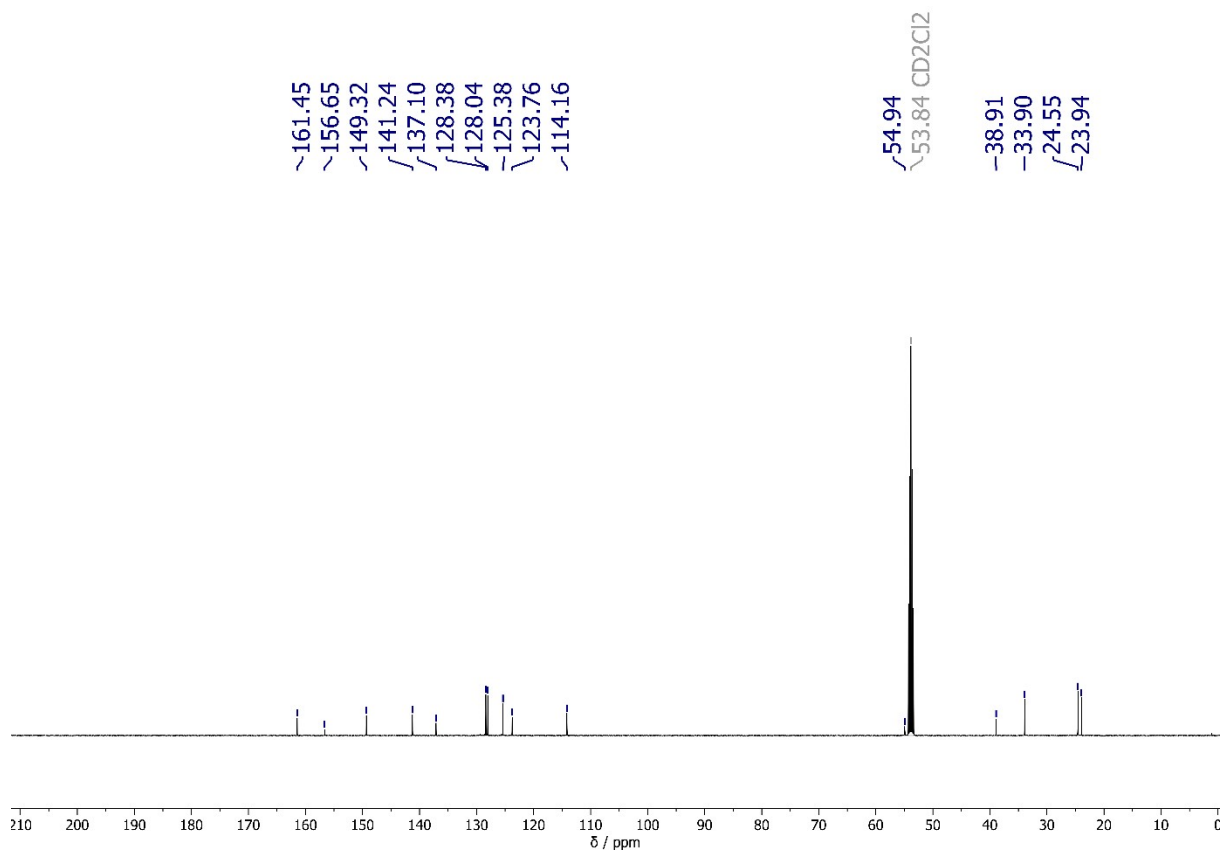

**Figure S11.**  $^{13}\text{C}\{^1\text{H}\}$  NMR spectrum of **3**,  $\text{CD}_2\text{Cl}_2$ , 25 °C.

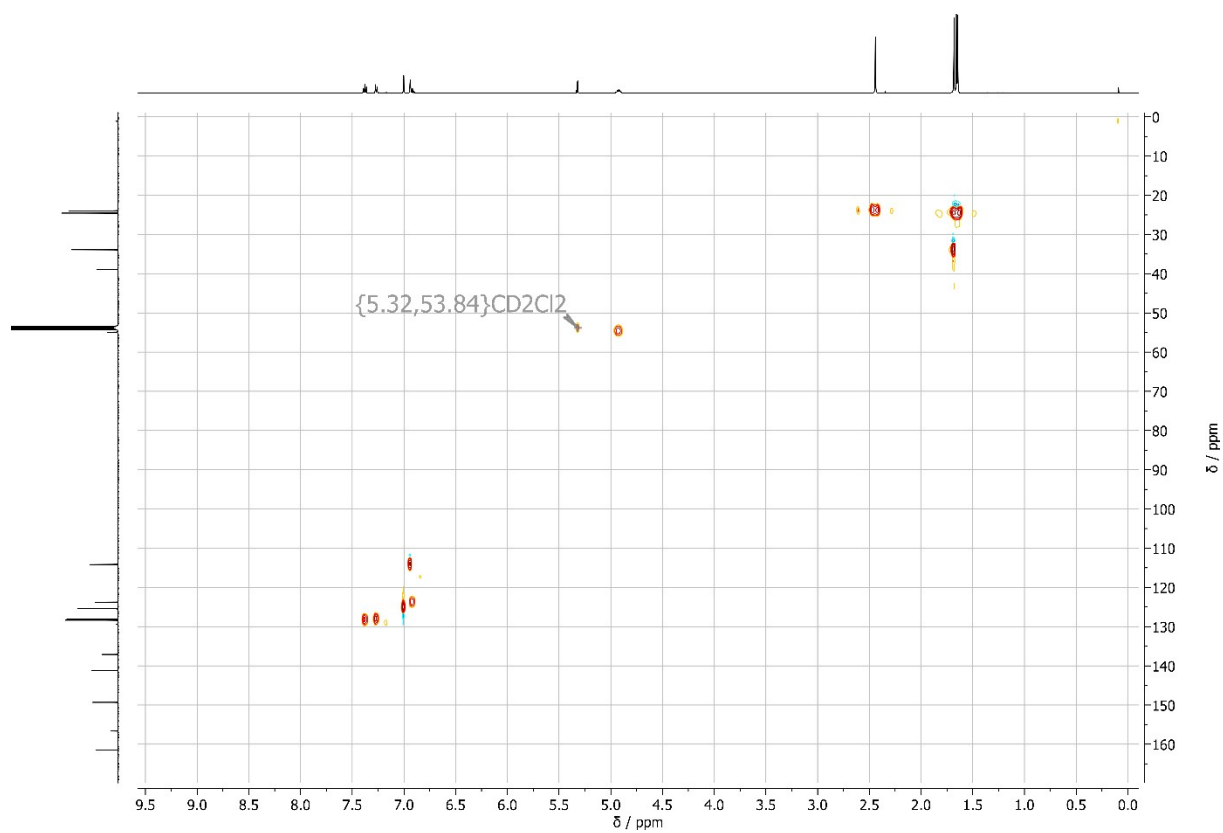

**Figure S12.** HSQC spectrum of **3**,  $\text{CD}_2\text{Cl}_2$ , 25 °C.

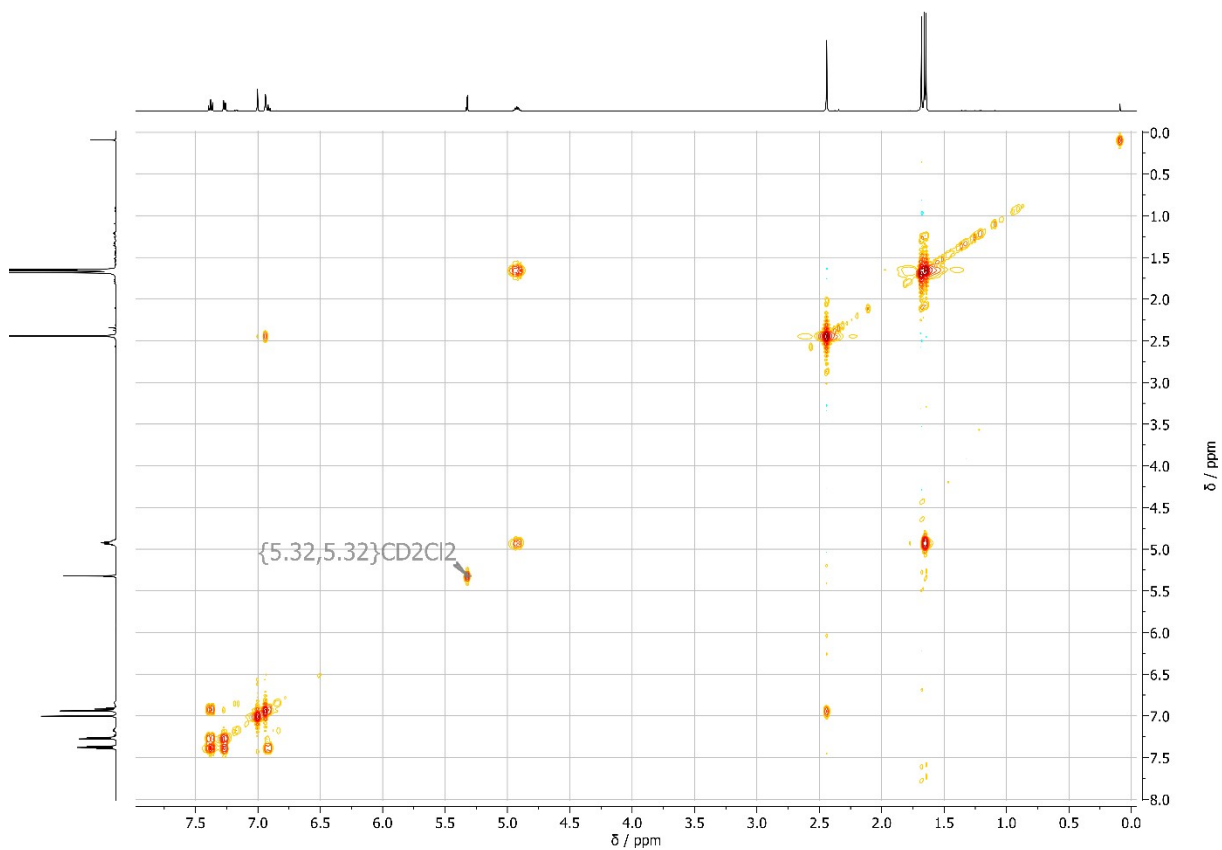

Figure S13. COSY spectrum of **3**, CD<sub>2</sub>Cl<sub>2</sub>, 25 °C.

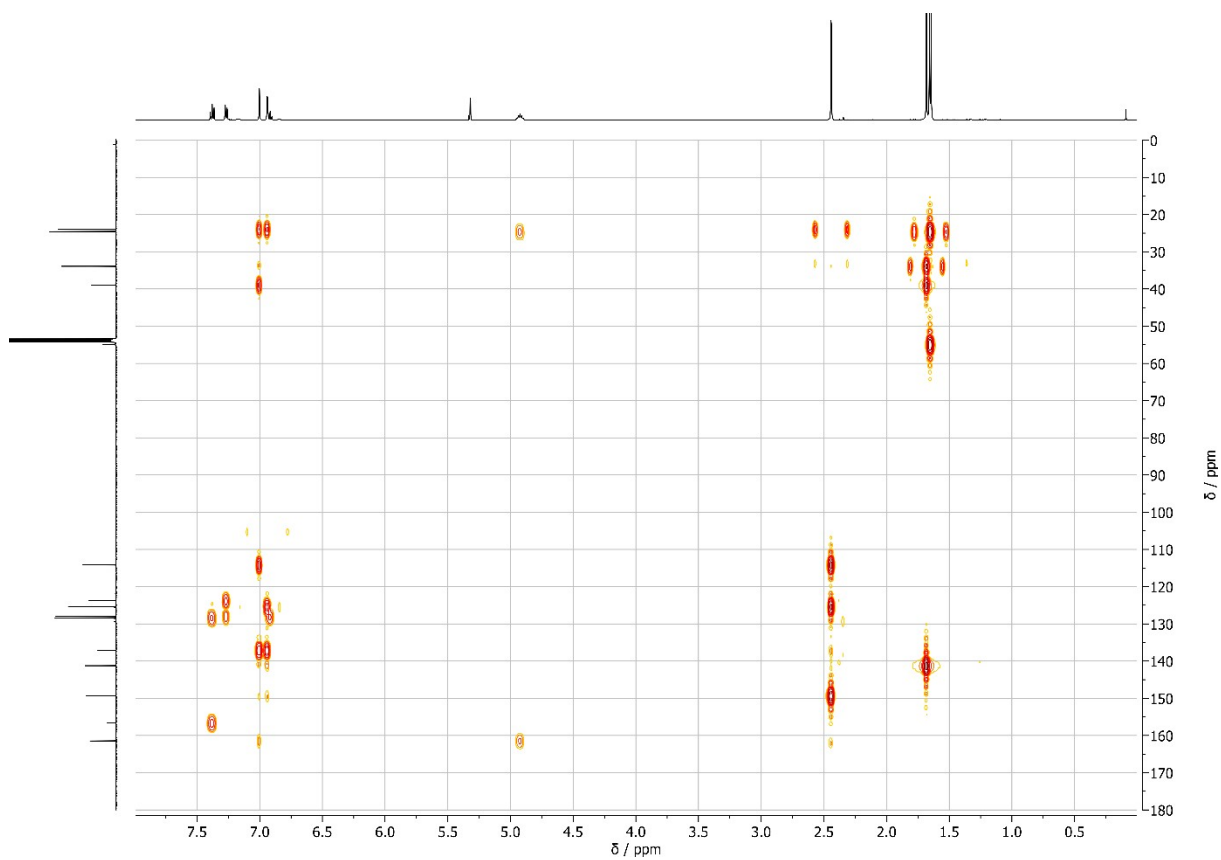

Figure S14. HMBC spectrum of **3**, CD<sub>2</sub>Cl<sub>2</sub>, 25 °C.



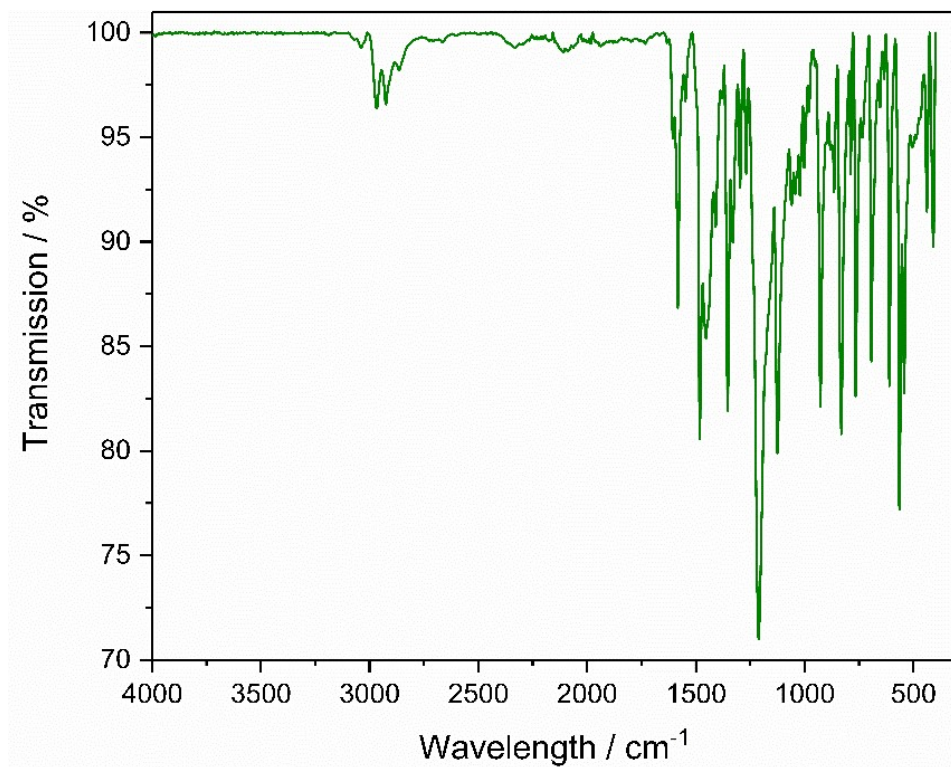

**Figure S15.** ATR-IR spectrum of **3**, solid, 25 °C.

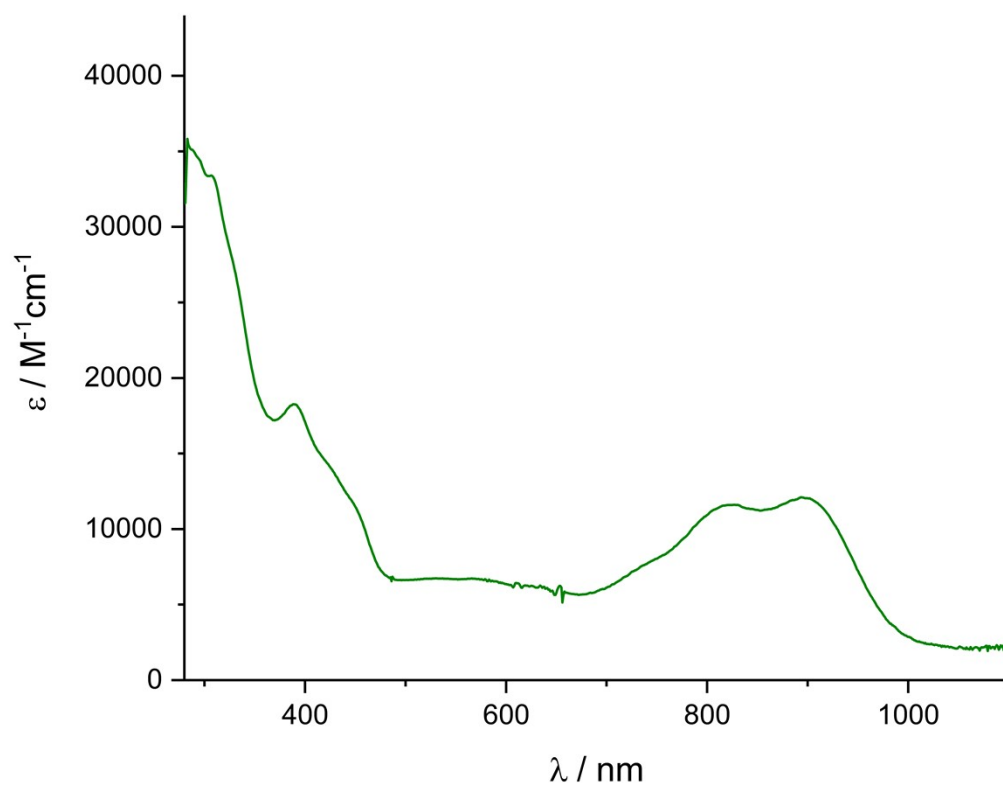

**Figure S16.** UV/vis spectrum of **3**, toluene, 25 °C.

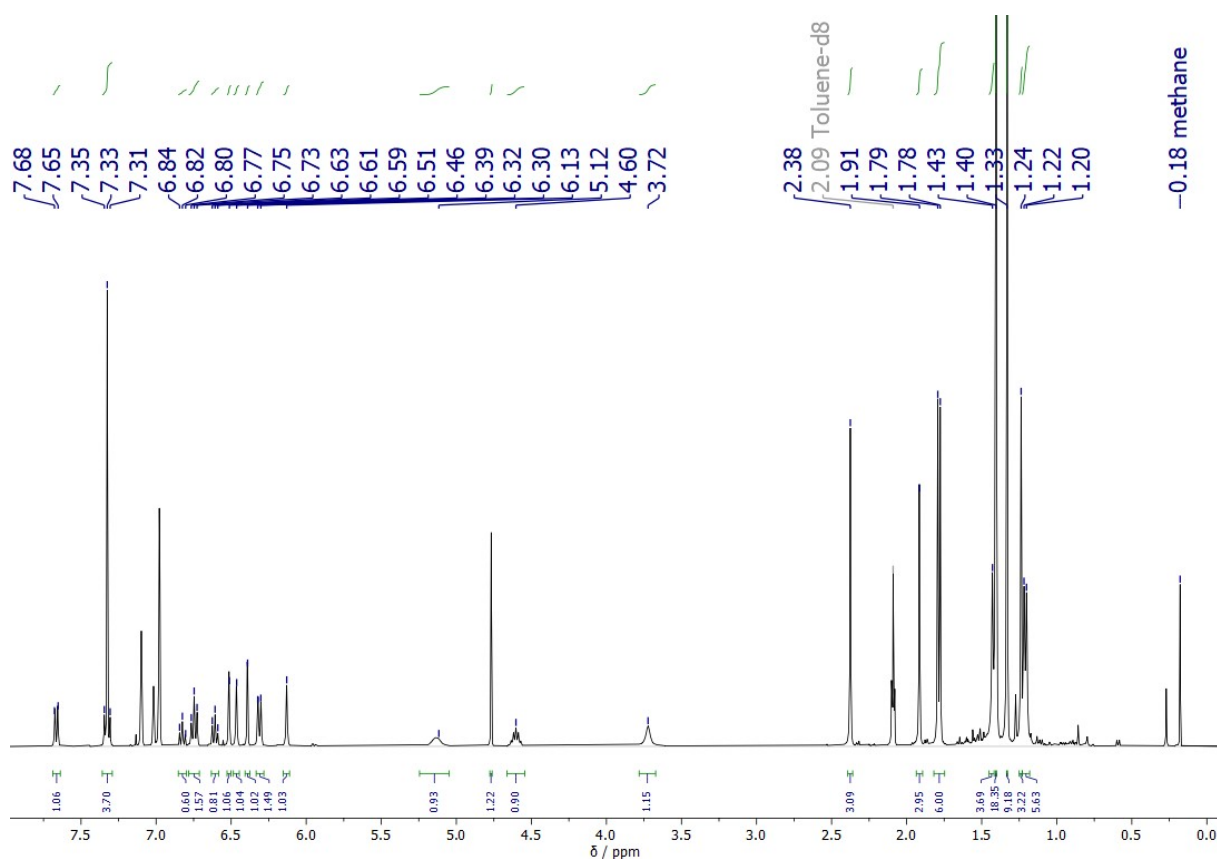

**Figure S17.**  $^1\text{H}$  NMR spectrum of the reaction of **1** with one eq. of  $\text{Ph}^*\text{O}\cdot$ ,  $\text{tol-d}_8$ ,  $25\text{ }^\circ\text{C}$ . The signal at  $\delta_{\text{H}} = 0.18$  ppm corresponds to methane originating from the freshly prepared solution of **1**.

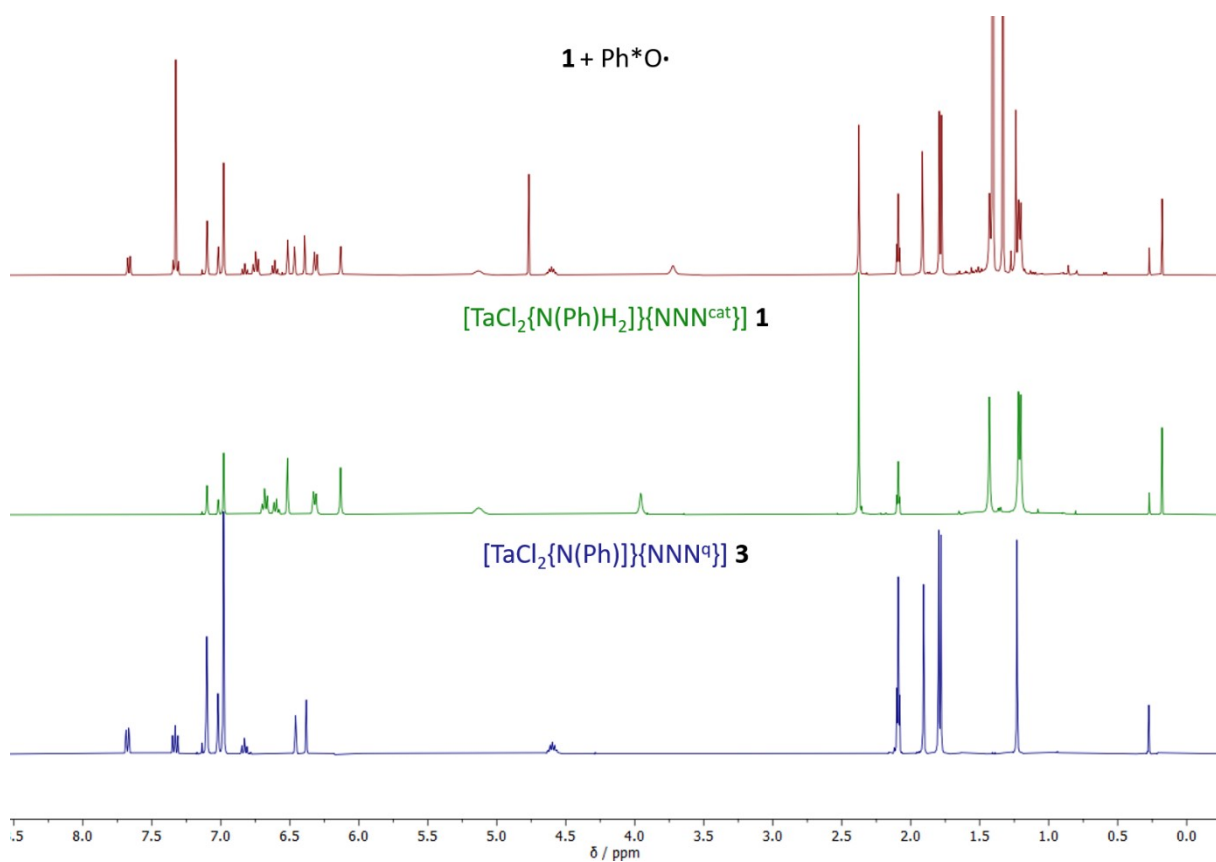

**Figure S18.**  $^1\text{H}$  NMR spectrum of the reaction of **1** with one eq. of  $\text{Ph}^*\text{O}\cdot$ ,  $\text{tol-d}_8$ ,  $25\text{ }^\circ\text{C}$  and comparison with **3** and **1**. The signal at  $\delta_{\text{H}} = 0.18$  ppm corresponds to methane originating from the freshly prepared solution of **1**.

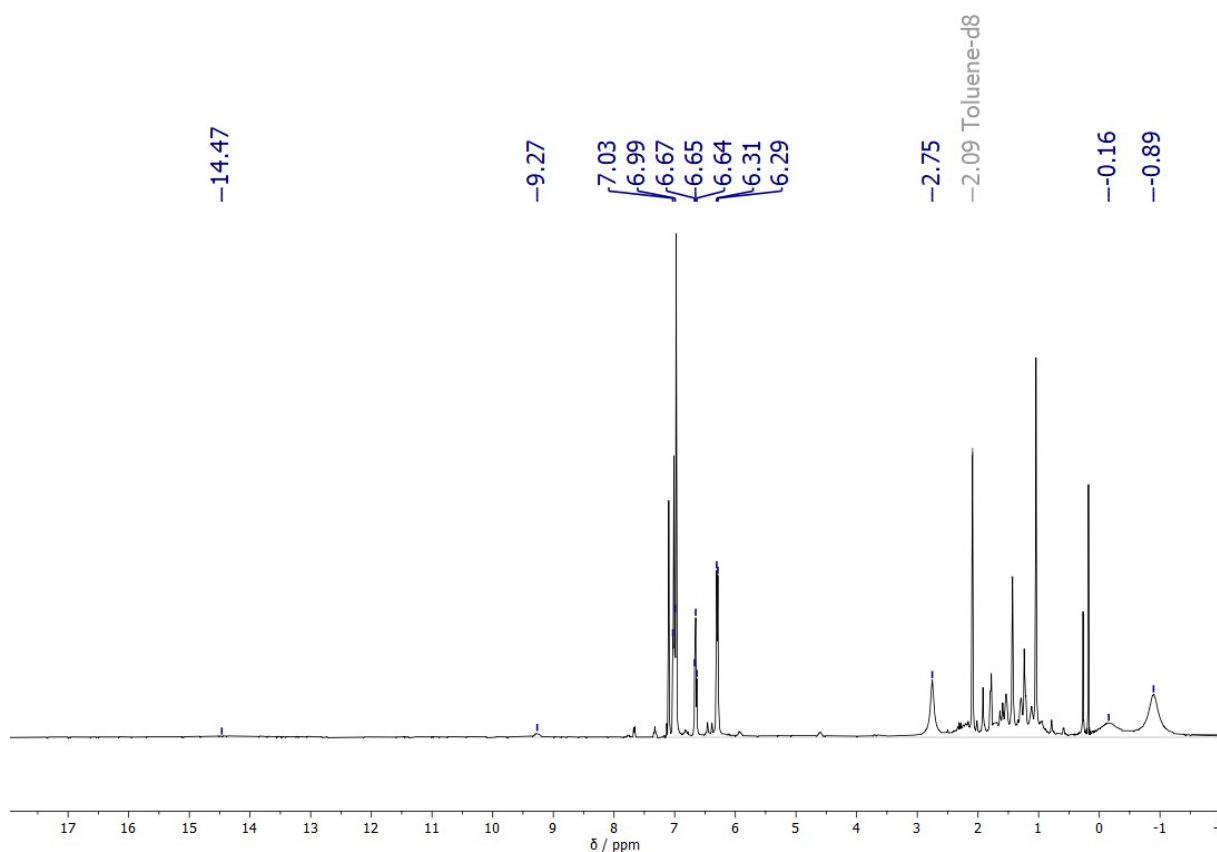

**Figure S19.**  $^1\text{H}$  NMR spectrum of **1** reacting with TEMPO, tol-d8, 25 °C, free aniline can be detected at  $\delta_{\text{H}} = 2.75, 6.65 - 6.29$  ppm; indicative signals of **II** are detected at  $\delta_{\text{H}} = -0.16$  and  $-0.89$  ppm.

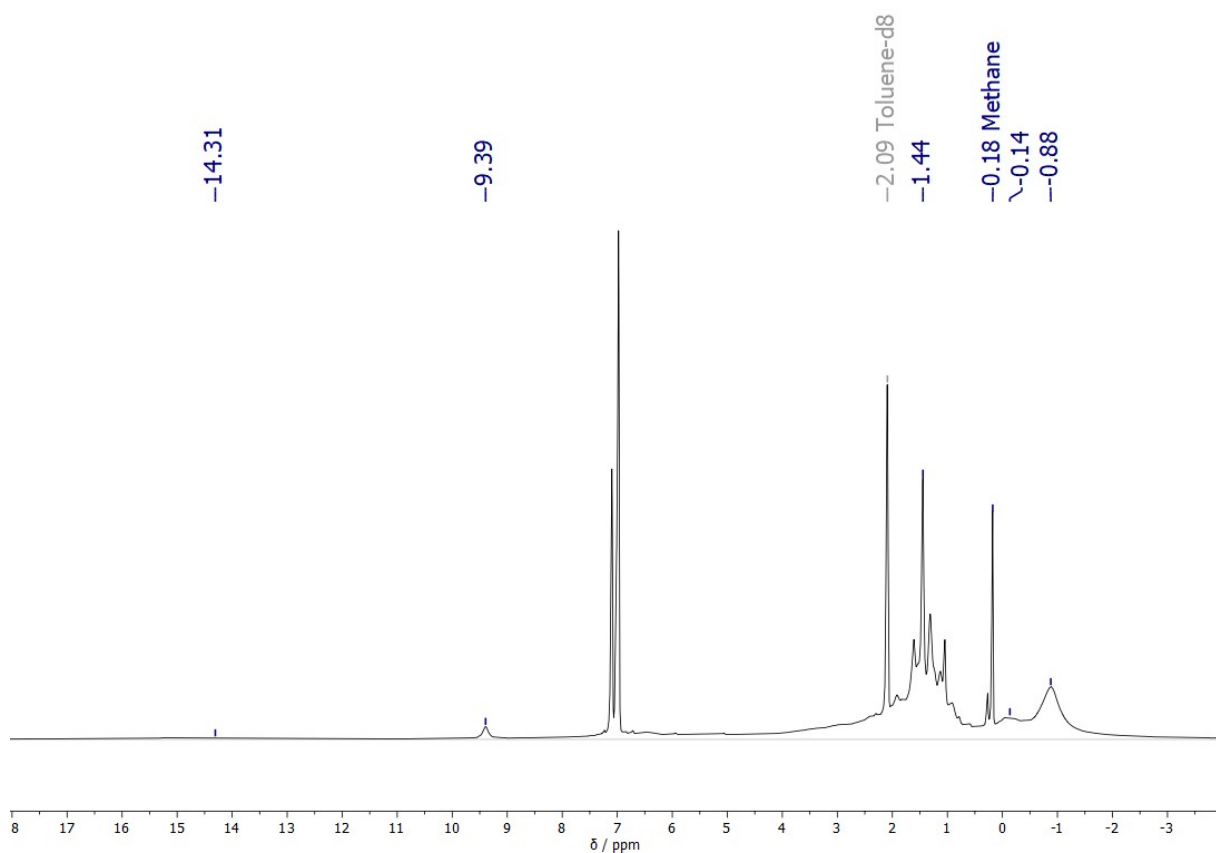

**Figure S20.**  $^1\text{H}$  NMR spectrum of **I** reacting with TEMPO, tol-d8, 25 °C; **II** is detected at  $\delta_{\text{H}} = -0.14$  and  $-0.89$  ppm.

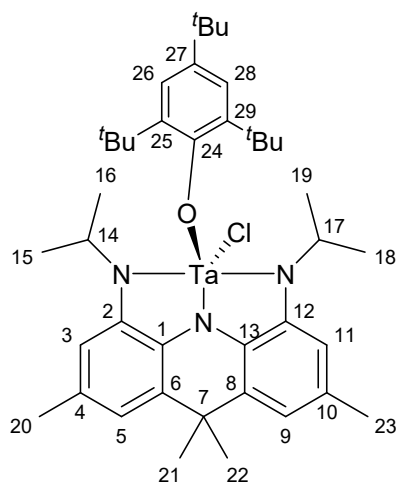

**Scheme S4.** Carbon numbering of **4** for clarification of NMR signal assignment.

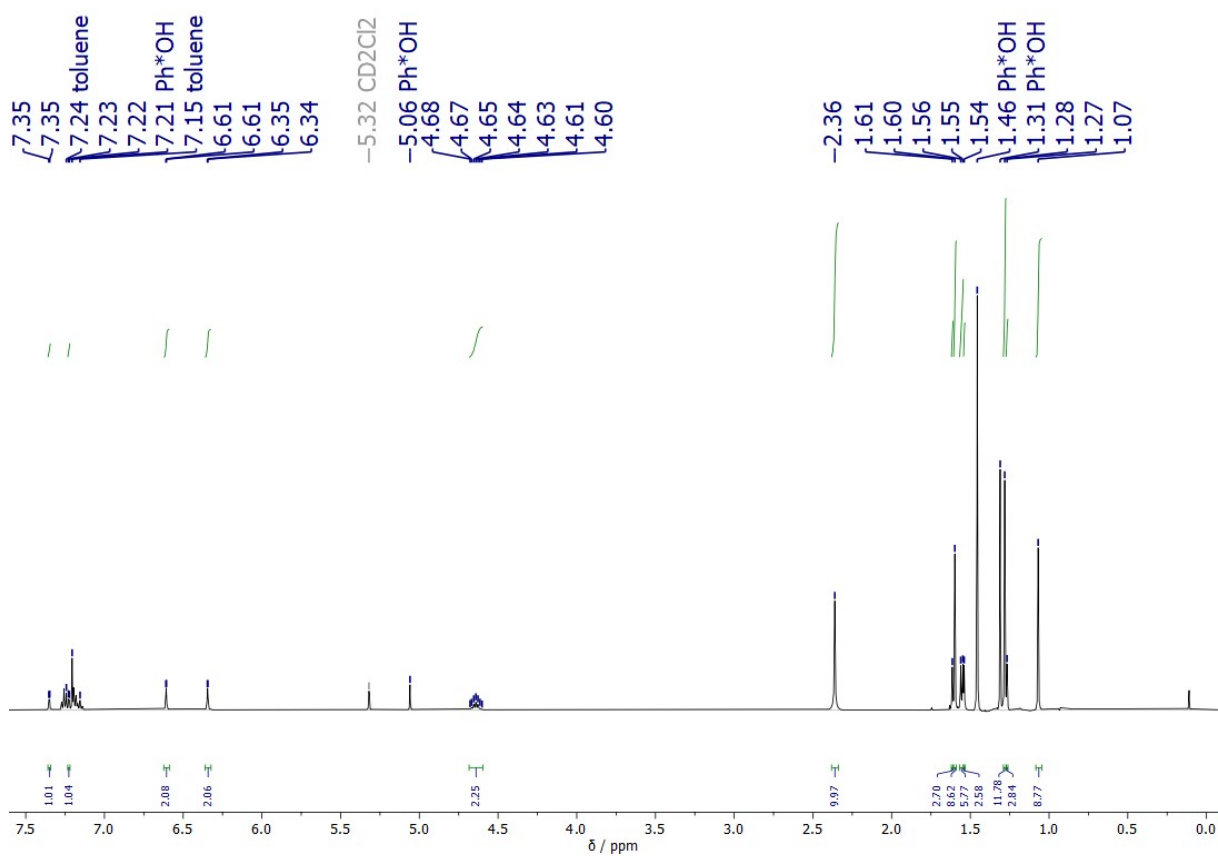

**Figure S21.** <sup>1</sup>H NMR spectrum of the reaction of **I** with PhO\* producing **4** and Ph\*OH, CD<sub>2</sub>Cl<sub>2</sub>, 25 °C.

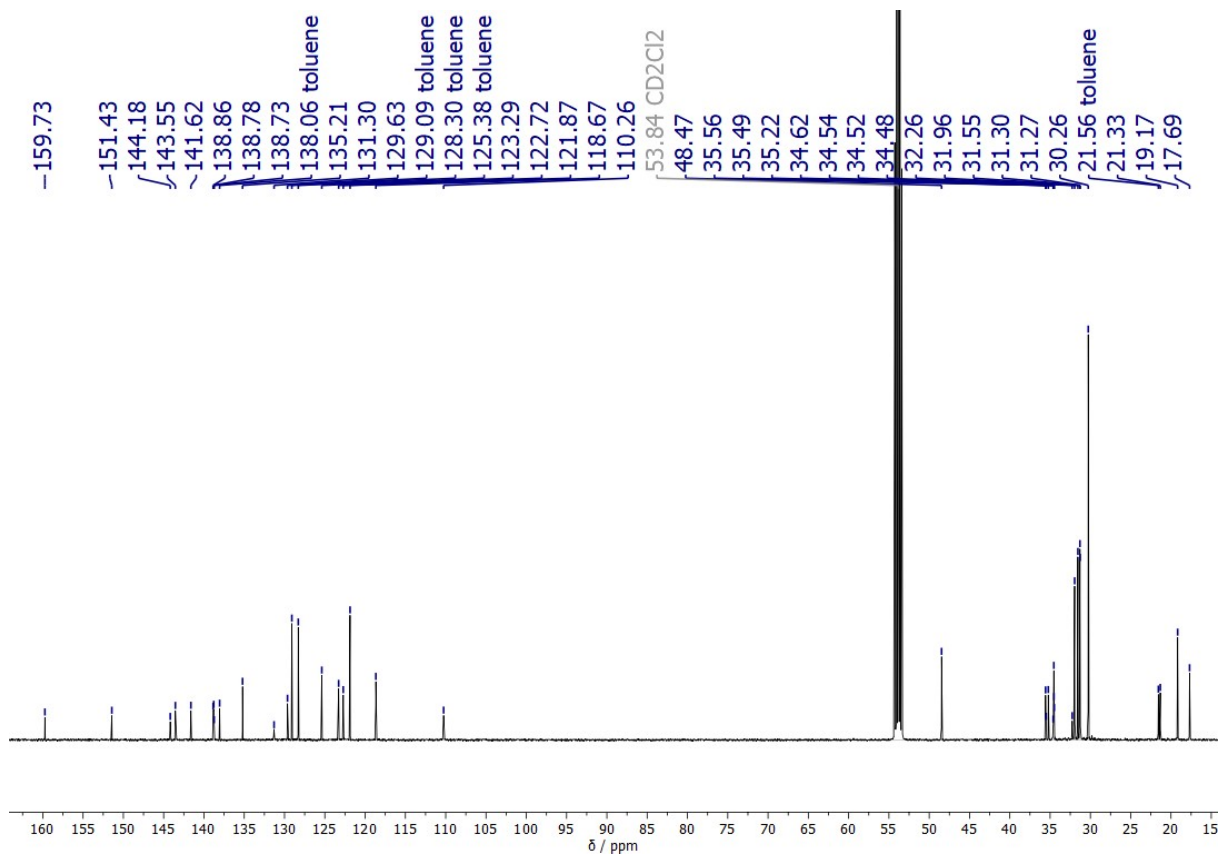

**Figure S22.**  $^{13}\text{C}\{^1\text{H}\}$  NMR spectrum of the reaction of **I** with  $\text{PhO}^*$  producing **4** and  $\text{Ph}^*\text{OH}$ ,  $\text{CD}_2\text{Cl}_2$ , 25 °C.

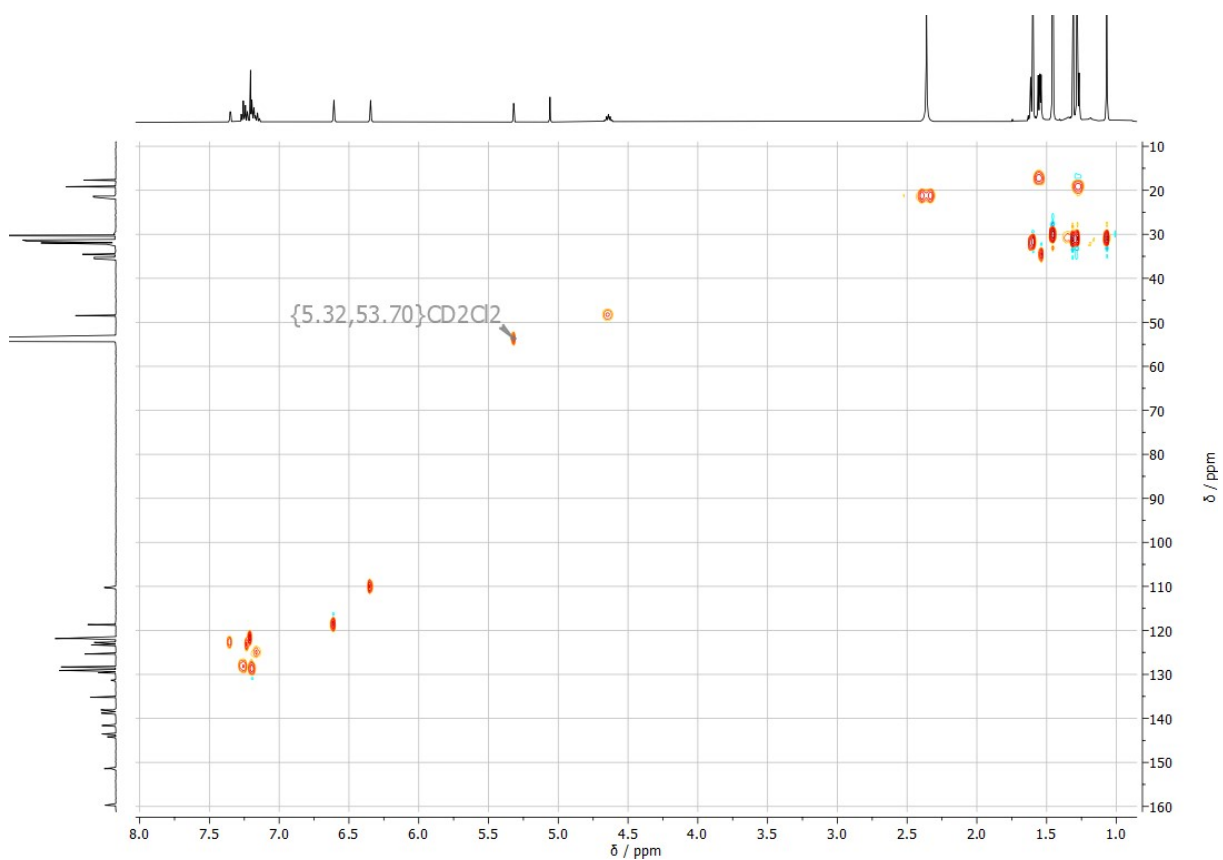

**Figure S23.** HSQC spectrum of the reaction of **I** with  $\text{PhO}^*$  producing **4** and  $\text{Ph}^*\text{OH}$ ,  $\text{CD}_2\text{Cl}_2$ , 25 °C.

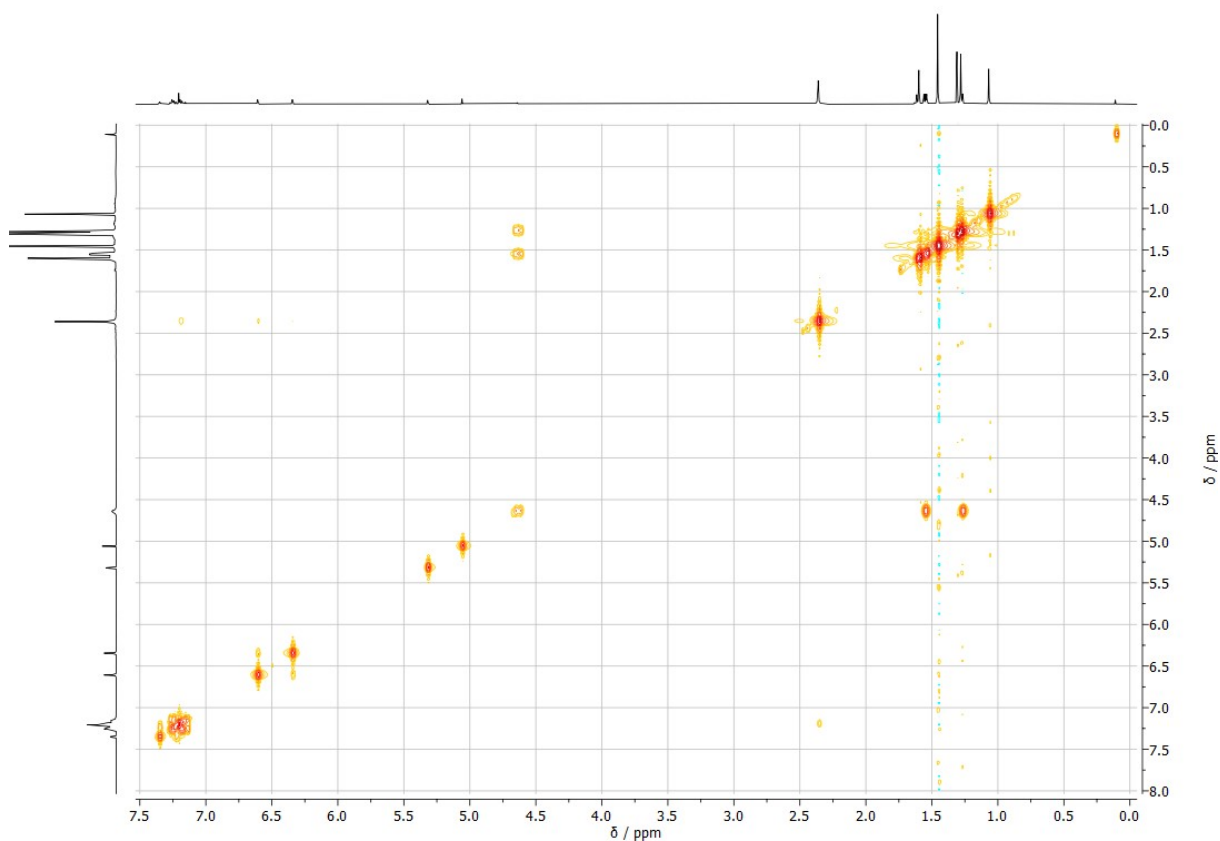

**Figure S24.** COSY spectrum of the reaction of **I** with PhO\* producing **4** and Ph\*OH, CD<sub>2</sub>Cl<sub>2</sub>, 25 °C.

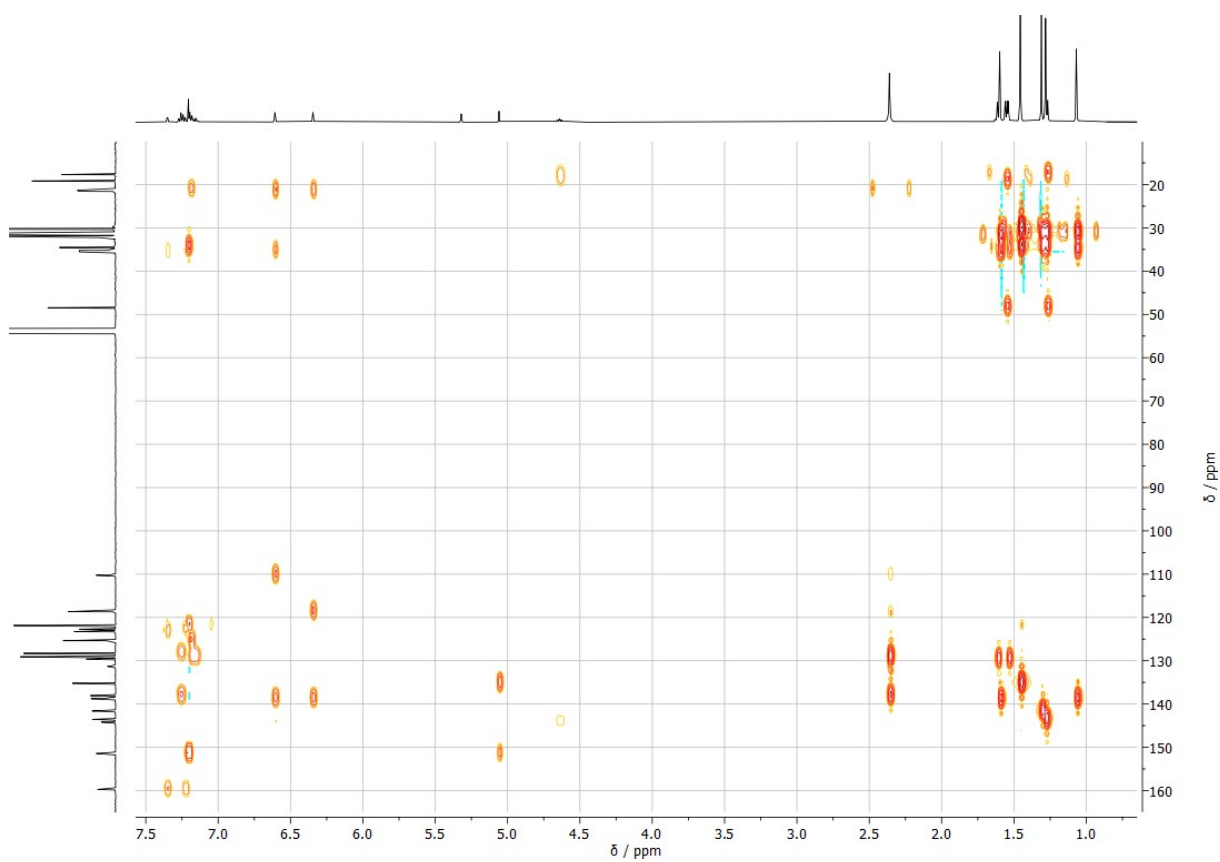

**Figure S25.** HMBC spectrum of the reaction of **I** with PhO\* producing **4** and Ph\*OH, CD<sub>2</sub>Cl<sub>2</sub>, 25 °C.

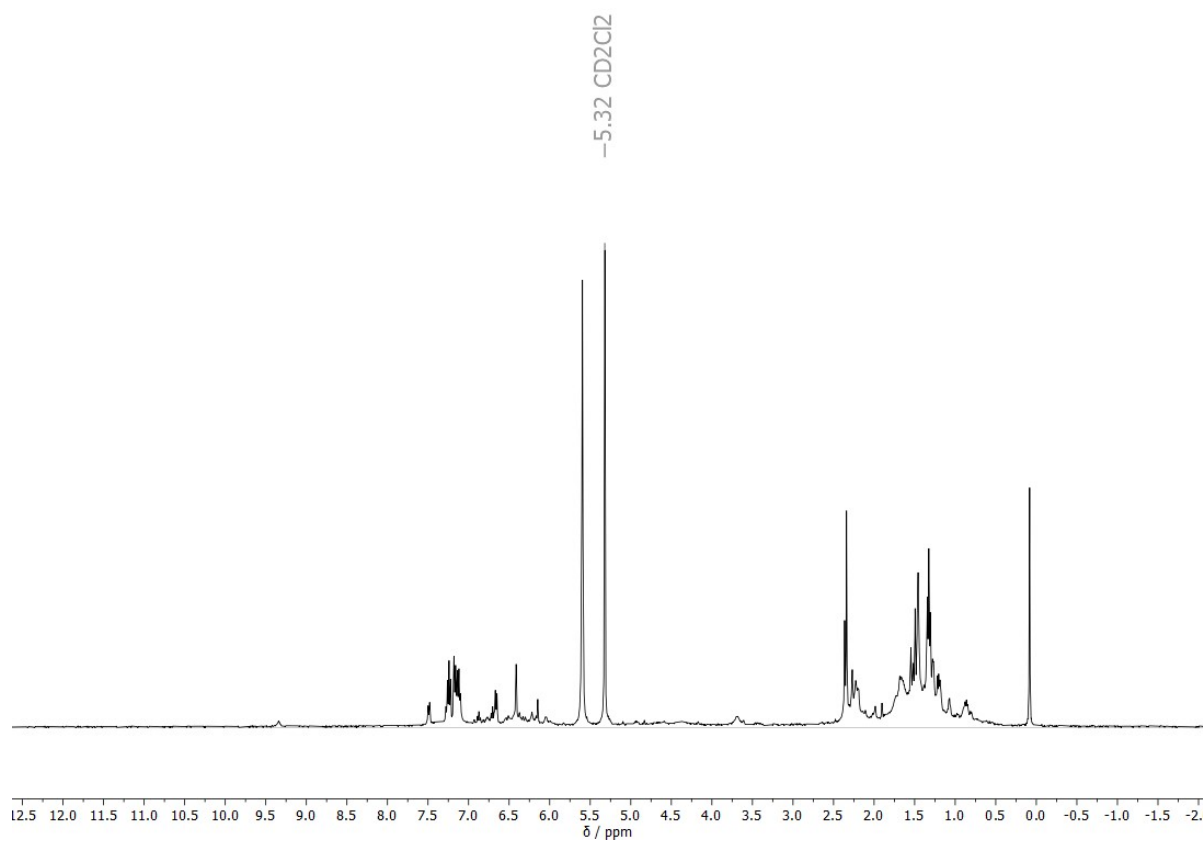

**Figure S26.** <sup>1</sup>H-NMR spectrum of **3** + CoCp<sub>2</sub>, CD<sub>2</sub>Cl<sub>2</sub>, 25 °C; no paramagnetic complex was detected. Partial precipitation of [CoCp<sub>2</sub>]Cl (evidenced by its colour) indicates unselective decomposition.

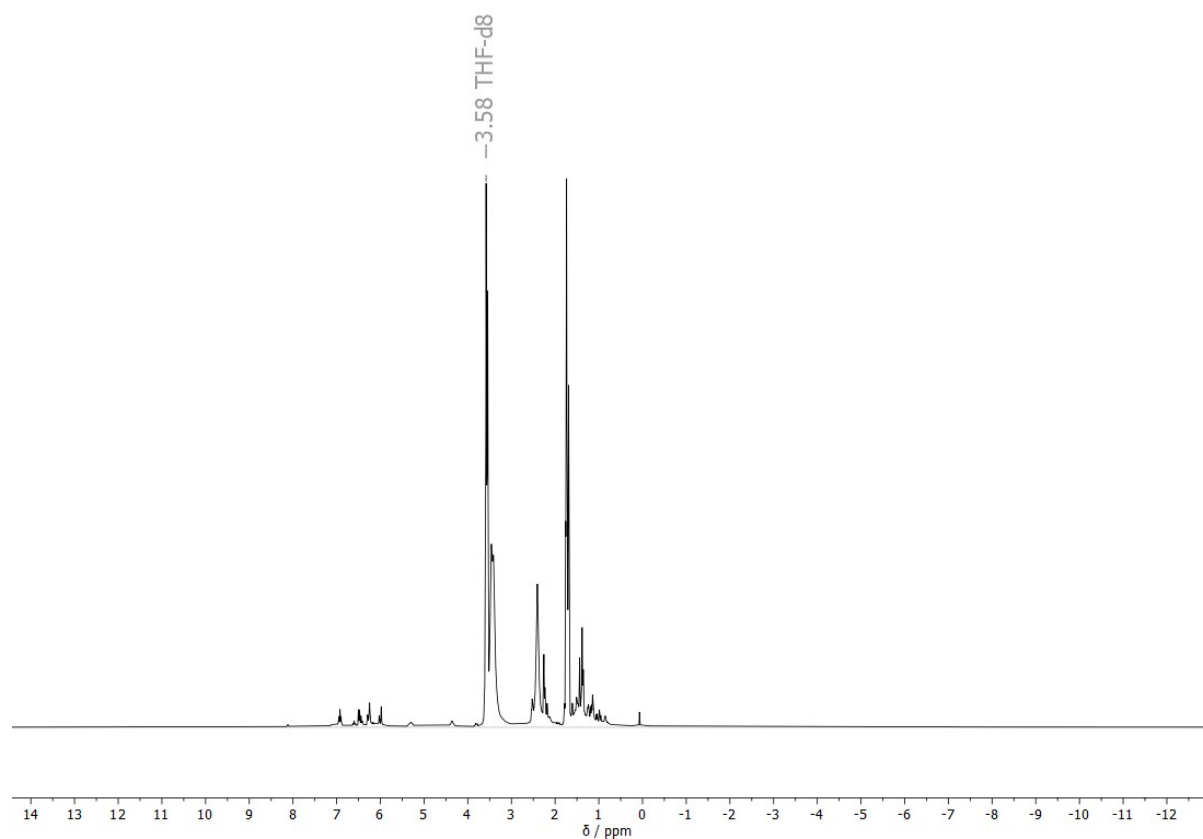

**Figure S27.** <sup>1</sup>H-NMR spectrum of **3** + KC<sub>8</sub>, THF-d<sub>8</sub>, 25 °C; no paramagnetic complex was detected.

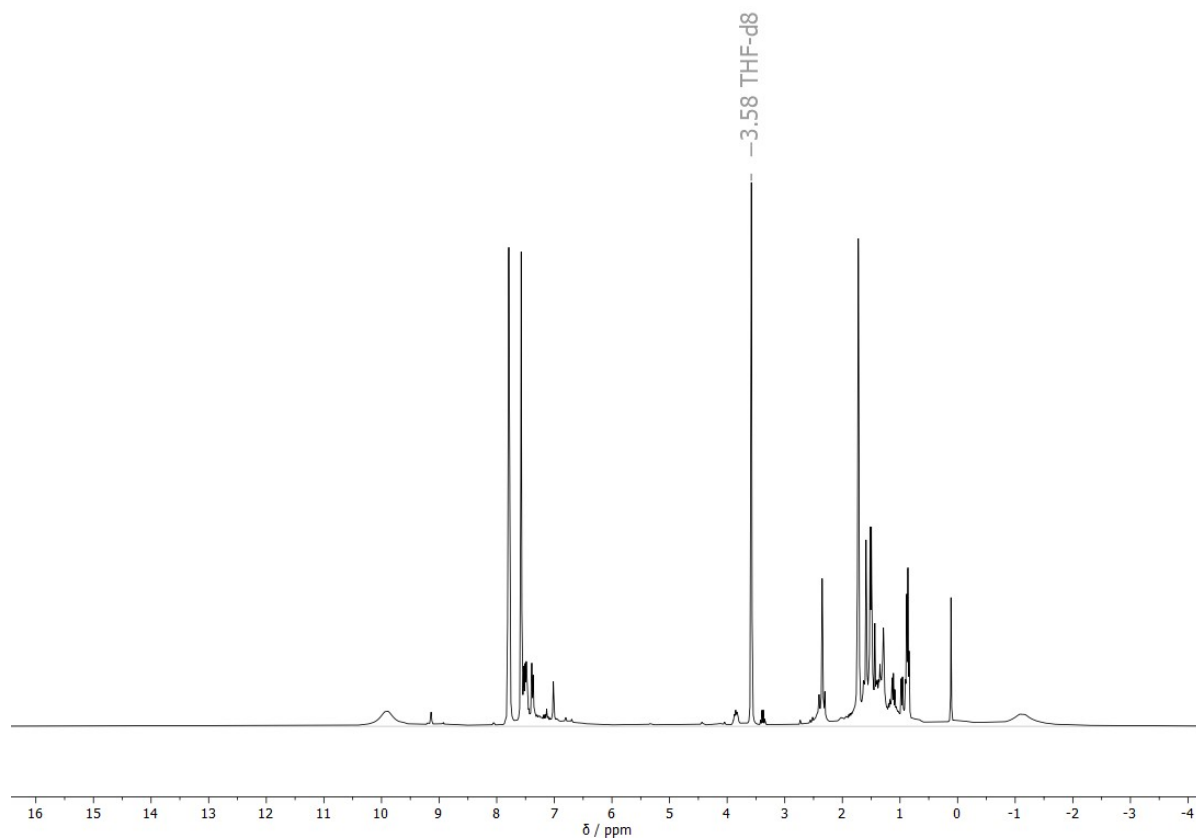

**Figure S28.** <sup>1</sup>H-NMR spectrum of **3** + [H(OEt<sub>2</sub>)<sub>2</sub>][BArF<sub>24</sub>], THF-d<sub>8</sub>, 25 °C.



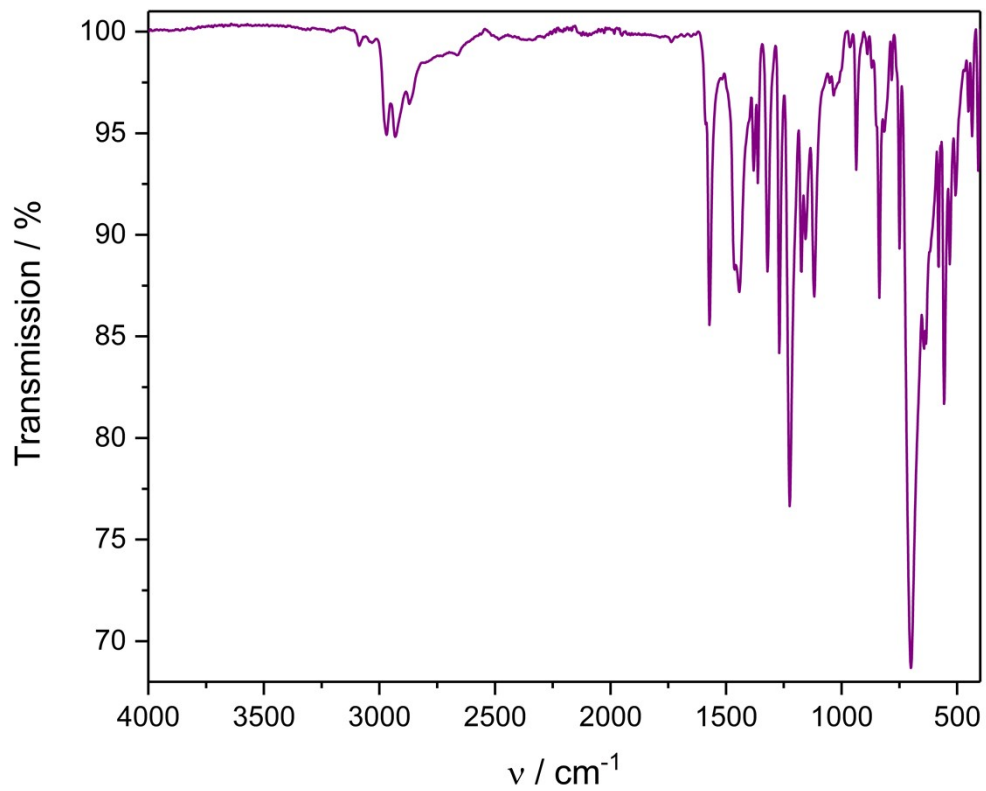

**Figure S31.** ATR-IR spectrum of **5**, solid, 25 °C.

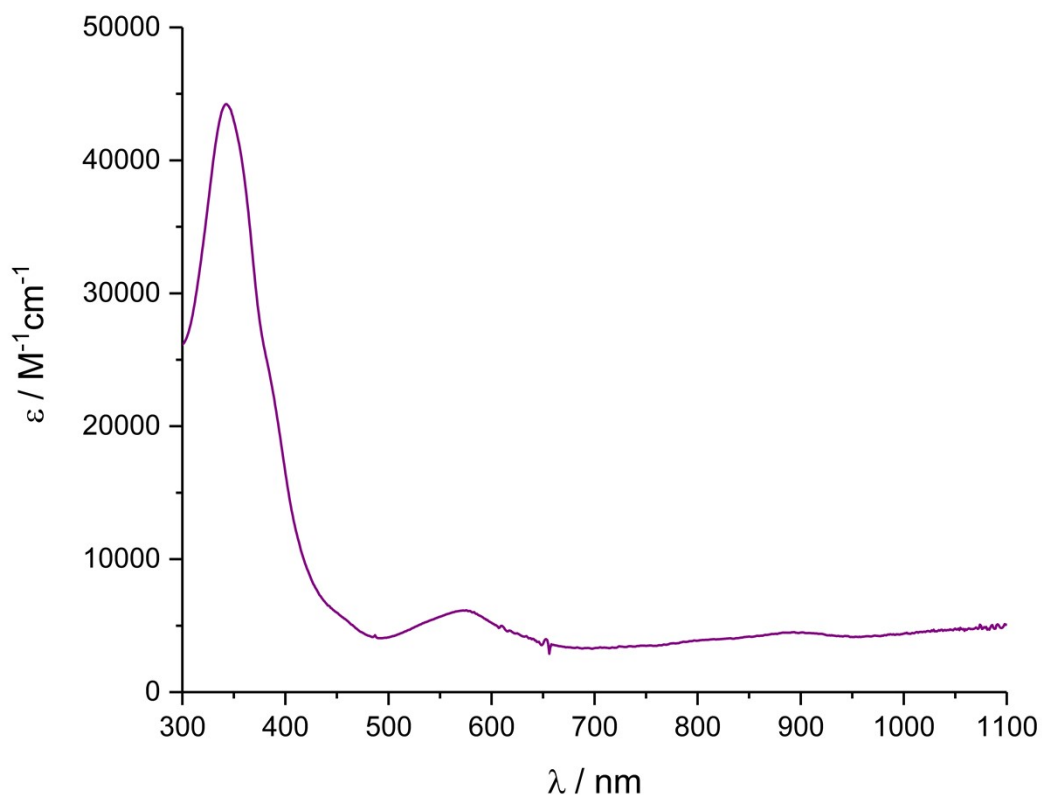

**Figure S32.** UV/vis spectrum of **5**, toluene, 25 °C.

### Cyclic Voltammetry

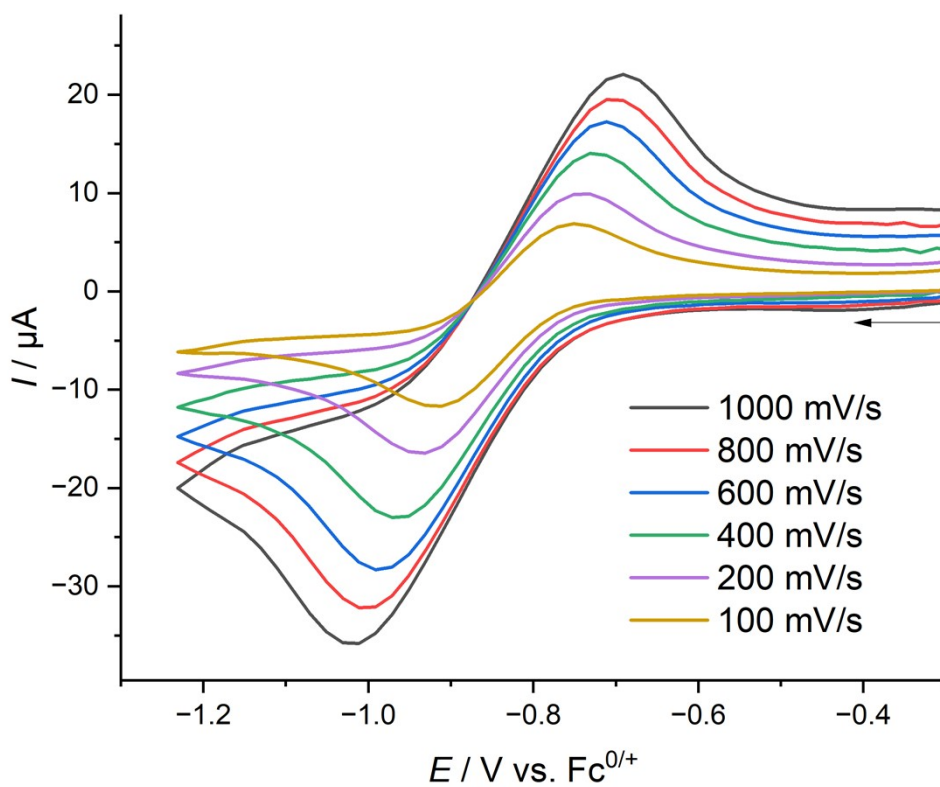

**Figure S33.** Cyclic voltammogram of **3**, THF; 25 °C, 0.1 M  $[NBu_4][PF_6]$ , 1 mM **3**.

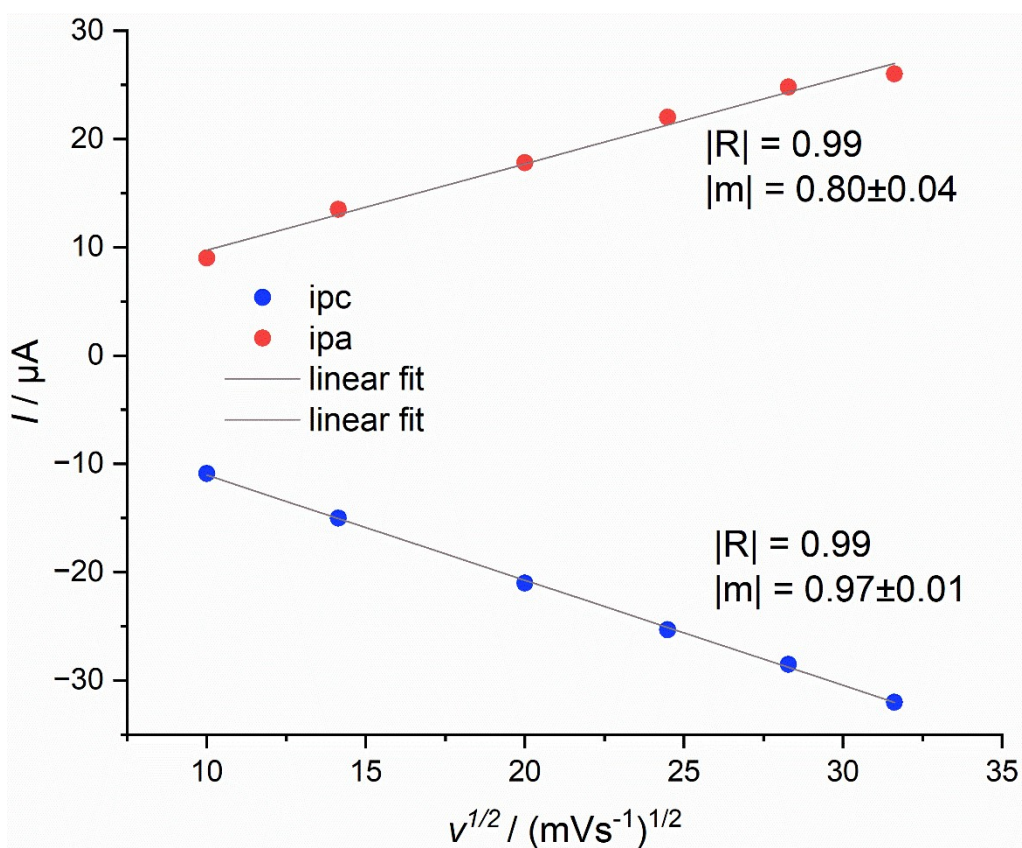

**Figure S34.** Peak current of the first redox event plotted against the square root of the scan rate including their linear fits. Fully reversible electron transfer between the analyte and the electrode is evident.

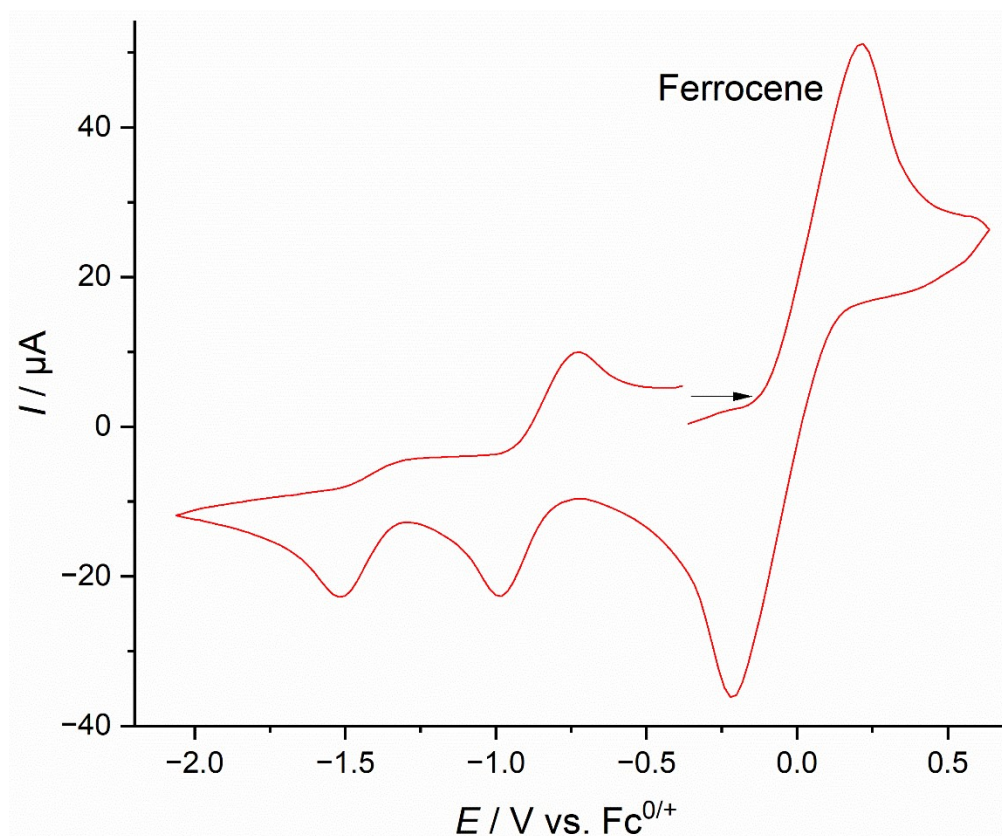

**Figure S35.** Cyclic voltammogram of **3** with ferrocene as internal reference showing a second fully irreversible redox event at  $E \approx -1.4$  V vs  $\text{Fc}^{0/+}$ , THF; 25 °C, 0.1 M  $[\text{NBu}_4][\text{PF}_6]$ , 1 mM **3**,  $\nu = 400$  mV/s.

**Table S1.**  $i_{pc}/i_{pa}$  ratios for the first reduction of **3** at different scan rates indicating the presence of a quasi-reversible reductive event. The data for higher scan rates is perturbed by the second irreversible redox event. The data point at  $\nu = 100$  mV/s however clearly demonstrates the inequivalence of forward and backward peak currents.

| Scan rate (mV/s) | $i_{pc}/i_{pa}$ |
|------------------|-----------------|
| 1000             | -1.23           |
| 800              | -1.15           |
| 600              | -1.15           |
| 400              | -1.18           |
| 200              | -1.11           |
| 100              | -1.21           |

Single Crystal X-ray Diffraction  
Crystallographic details of **3**

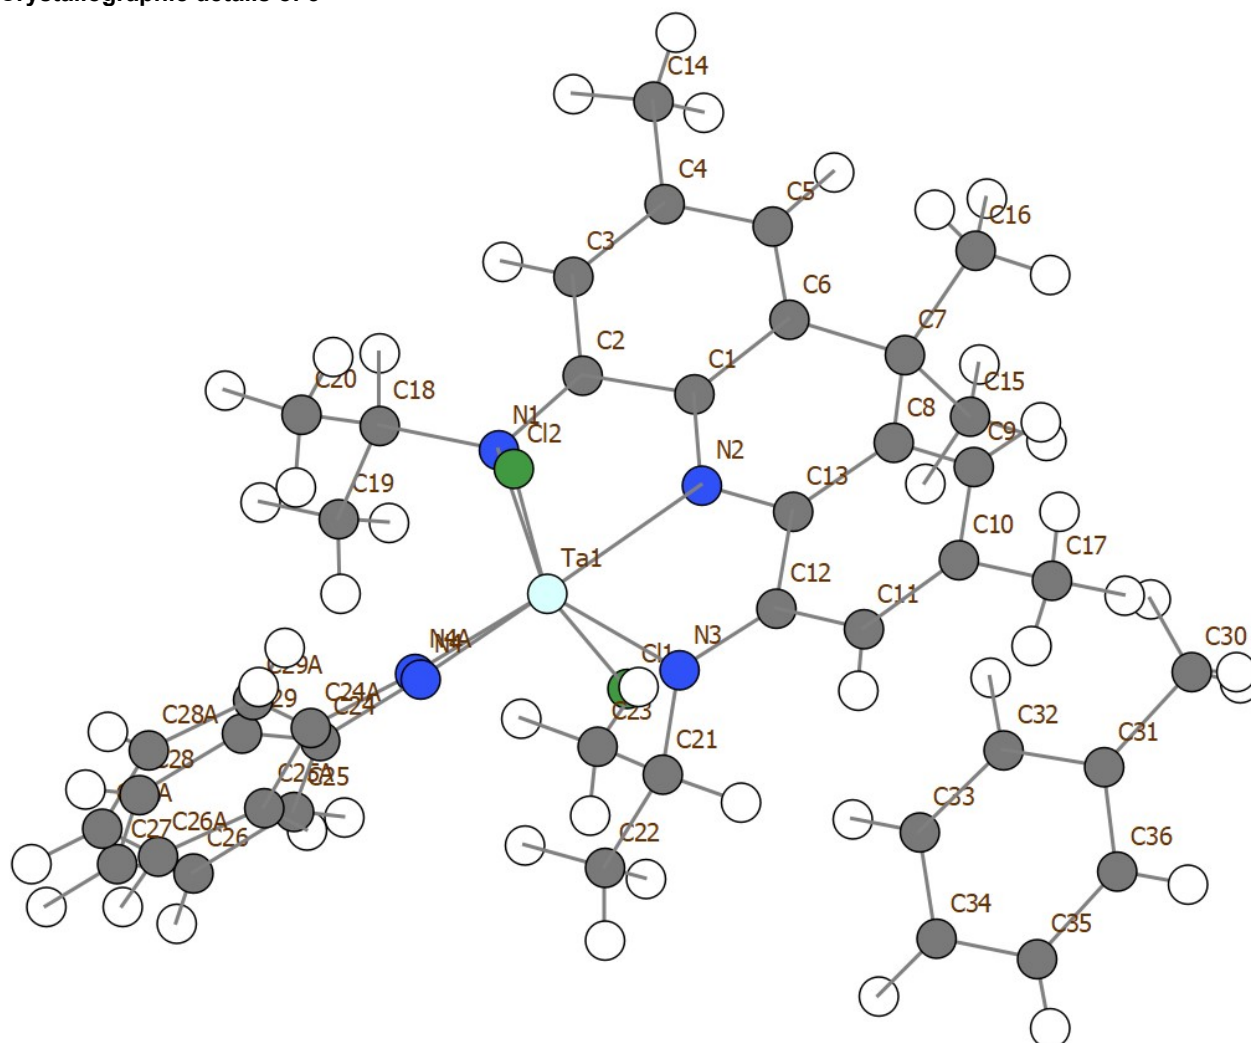

A purple, block-shaped crystal of mo\_ja24\_sp\_ii\_61\_2\_0m\_a (**3**) was mounted on a MiTeGen micromount with perfluoroether oil. Data were collected from a shock-cooled single crystal at 100(2) K on a Bruker D8 VENTURE dual wavelength Mo/Cu three-circle diffractometer with a microfocus sealed X-ray tube using a mirror optics as monochromator and a Bruker PHOTON III detector. The diffractometer was equipped with an Oxford Cryostream 800 low temperature device and used MoK $\alpha$  radiation ( $\lambda = 0.71073$  Å). All data were integrated with SAINT and a multi-scan absorption correction using SADABS was applied.<sup>[12,13]</sup> The structure was solved by direct methods using SHELXT and refined by full-matrix least-squares methods against  $F^2$  by SHELXL-2019/2.<sup>[14,15]</sup> All non-hydrogen atoms were refined with anisotropic displacement parameters. All hydrogen atoms were refined isotropic on calculated positions using a riding model with their  $U_{\text{iso}}$  values constrained to 1.5 times the  $U_{\text{eq}}$  of their pivot atoms for terminal  $sp^3$  carbon atoms and 1.2 times for all other carbon atoms. Disordered moieties were refined using bond lengths restraints and displacement parameter restraints. The largest residuals are not near the heavy atom or in chemically sensible positions. This is most probably due to slight twinning or other effects. Crystallographic data for the structures reported here have been deposited with the Cambridge Crystallographic Data Centre.<sup>[16]</sup> CCDC 2383359 contain the supplementary crystallographic data for this paper. These data can be obtained free of charge from The Cambridge Crystallographic Data Centre via [www.ccdc.cam.ac.uk/structures](http://www.ccdc.cam.ac.uk/structures). This report and the CIF file were generated using FinalCif.<sup>[17]</sup>

**Table S2.** Crystal data and structure refinement for mo\_ja24\_sp\_ii\_61\_2\_0m\_a (3).

|                                             |                                                                                |
|---------------------------------------------|--------------------------------------------------------------------------------|
| CCDC number                                 | 2383359                                                                        |
| Empirical formula                           | C <sub>65</sub> H <sub>78</sub> Cl <sub>4</sub> N <sub>8</sub> Ta <sub>2</sub> |
| Formula weight                              | 1475.05                                                                        |
| Temperature [K]                             | 100(2)                                                                         |
| Crystal system                              | monoclinic                                                                     |
| Space group (number)                        | <i>P</i> 2 <sub>1</sub> / <i>n</i> (14)                                        |
| <i>a</i> [Å]                                | 16.6831(8)                                                                     |
| <i>b</i> [Å]                                | 10.0197(4)                                                                     |
| <i>c</i> [Å]                                | 18.8593(10)                                                                    |
| α [°]                                       | 90                                                                             |
| β [°]                                       | 98.358(2)                                                                      |
| γ [°]                                       | 90                                                                             |
| Volume [Å <sup>3</sup> ]                    | 3119.0(3)                                                                      |
| <i>Z</i>                                    | 2                                                                              |
| ρ <sub>calc</sub> [gcm <sup>-3</sup> ]      | 1.571                                                                          |
| μ [mm <sup>-1</sup> ]                       | 3.723                                                                          |
| <i>F</i> (000)                              | 1476                                                                           |
| Crystal size [mm <sup>3</sup> ]             | 0.270×0.030×0.010                                                              |
| Crystal colour                              | purple                                                                         |
| Crystal shape                               | block                                                                          |
| Radiation                                   | MoK <sub>α</sub> (λ=0.71073 Å)                                                 |
| 2θ range [°]                                | 4.37 to 61.08 (0.70 Å)                                                         |
| Index ranges                                | -23 ≤ <i>h</i> ≤ 23<br>-14 ≤ <i>k</i> ≤ 14<br>-26 ≤ <i>l</i> ≤ 26              |
| Reflections collected                       | 72952                                                                          |
| Independent reflections                     | 9543<br><i>R</i> <sub>int</sub> = 0.0753<br><i>R</i> <sub>sigma</sub> = 0.0459 |
| Completeness to θ = 25.242°                 | 100.0 %                                                                        |
| Data / Restraints / Parameters              | 9543/30/383                                                                    |
| Absorption correction                       | 0.6029/0.7461                                                                  |
| T <sub>min</sub> /T <sub>max</sub> (method) | multi-scan                                                                     |
| Goodness-of-fit on <i>F</i> <sup>2</sup>    | 1.040                                                                          |
| Final <i>R</i> indexes                      | <i>R</i> <sub>1</sub> = 0.0293                                                 |
| [ <i>I</i> ≥ 2σ( <i>I</i> )]                | <i>wR</i> <sub>2</sub> = 0.0507                                                |
| Final <i>R</i> indexes                      | <i>R</i> <sub>1</sub> = 0.0506                                                 |
| [all data]                                  | <i>wR</i> <sub>2</sub> = 0.0582                                                |
| Largest peak/hole [eÅ <sup>-3</sup> ]       | 1.41/-0.88                                                                     |

**Table S3.** Bond lengths and angles for **3**.

| <b>Atom–Atom</b>      | <b>Length [Å]</b> |             |            |
|-----------------------|-------------------|-------------|------------|
| Ta1–N4                | 1.794(7)          | N3–Ta1–N2   | 73.09(9)   |
| Ta1–N4A               | 1.815(13)         | N1–Ta1–N2   | 72.85(9)   |
| Ta1–N3                | 2.153(2)          | N4–Ta1–Cl2  | 96.7(6)    |
| Ta1–N1                | 2.158(2)          | N4A–Ta1–Cl2 | 97.6(11)   |
| Ta1–N2                | 2.218(2)          | N3–Ta1–Cl2  | 85.13(7)   |
| Ta1–Cl2               | 2.4283(7)         | N1–Ta1–Cl2  | 87.05(7)   |
| Ta1–Cl1               | 2.4343(8)         | N2–Ta1–Cl2  | 82.62(6)   |
| N1–C2                 | 1.346(3)          | N4–Ta1–Cl1  | 98.9(6)    |
| N1–C18                | 1.496(4)          | N4A–Ta1–Cl1 | 98.1(11)   |
| N2–C1                 | 1.323(4)          | N3–Ta1–Cl1  | 88.92(7)   |
| N2–C13                | 1.338(4)          | N1–Ta1–Cl1  | 89.76(7)   |
| N3–C12                | 1.353(3)          | N2–Ta1–Cl1  | 81.76(6)   |
| N3–C21                | 1.489(4)          | Cl2–Ta1–Cl1 | 164.30(2)  |
| C1–C6                 | 1.427(4)          | C2–N1–C18   | 118.7(2)   |
| C1–C2                 | 1.451(4)          | C2–N1–Ta1   | 118.00(19) |
| C2–C3                 | 1.431(4)          | C18–N1–Ta1  | 123.22(18) |
| C3–C4                 | 1.369(4)          | C1–N2–C13   | 124.2(2)   |
| C4–C5                 | 1.436(4)          | C1–N2–Ta1   | 118.07(18) |
| C4–C14                | 1.509(4)          | C13–N2–Ta1  | 117.46(19) |
| C5–C6                 | 1.360(4)          | C12–N3–C21  | 117.9(2)   |
| C6–C7                 | 1.533(4)          | C12–N3–Ta1  | 117.2(2)   |
| C7–C8                 | 1.528(4)          | C21–N3–Ta1  | 124.11(18) |
| C7–C16                | 1.532(4)          | N2–C1–C6    | 121.6(3)   |
| C7–C15                | 1.555(4)          | N2–C1–C2    | 114.3(2)   |
| C8–C9                 | 1.370(4)          | C6–C1–C2    | 124.0(3)   |
| C8–C13                | 1.420(4)          | N1–C2–C3    | 128.3(3)   |
| C9–C10                | 1.434(5)          | N1–C2–C1    | 116.6(3)   |
| C10–C11               | 1.370(4)          | C3–C2–C1    | 115.1(2)   |
| C10–C17               | 1.508(4)          | C4–C3–C2    | 121.1(3)   |
| C11–C12               | 1.428(4)          | C3–C4–C5    | 121.2(3)   |
| C12–C13               | 1.439(4)          | C3–C4–C14   | 120.5(3)   |
| C18–C20               | 1.517(4)          | C5–C4–C14   | 118.4(3)   |
| C18–C19               | 1.527(4)          | C6–C5–C4    | 121.6(3)   |
| C21–C23               | 1.509(5)          | C5–C6–C1    | 116.9(3)   |
| C21–C22               | 1.525(5)          | C5–C6–C7    | 124.6(3)   |
| N4–C24                | 1.380(7)          | C1–C6–C7    | 118.2(3)   |
| C24–C25               | 1.398(7)          | C8–C7–C16   | 112.2(3)   |
| C24–C29               | 1.400(7)          | C8–C7–C6    | 112.0(2)   |
| C25–C26               | 1.373(7)          | C16–C7–C6   | 111.5(3)   |
| C26–C27               | 1.378(9)          | C8–C7–C15   | 106.1(2)   |
| C27–C28               | 1.372(9)          | C16–C7–C15  | 108.7(2)   |
| C28–C29               | 1.404(8)          | C6–C7–C15   | 105.9(2)   |
| N4A–C24A              | 1.384(12)         | C9–C8–C13   | 116.5(3)   |
| C24A–C29A             | 1.394(11)         | C9–C8–C7    | 125.4(3)   |
| C24A–C25A             | 1.401(11)         | C13–C8–C7   | 117.9(3)   |
| C25A–C26A             | 1.393(12)         | C8–C9–C10   | 121.4(3)   |
| C26A–C27A             | 1.375(15)         | C11–C10–C9  | 121.3(3)   |
| C27A–C28A             | 1.388(13)         | C11–C10–C17 | 120.5(3)   |
| C28A–C29A             | 1.380(11)         | C9–C10–C17  | 118.2(3)   |
| C30–C31               | 1.495(17)         | C10–C11–C12 | 120.6(3)   |
| C31–C32               | 1.361(10)         | N3–C12–C11  | 127.5(3)   |
| C31–C36               | 1.368(10)         | N3–C12–C13  | 116.8(3)   |
| C32–C33               | 1.389(10)         | C11–C12–C13 | 115.7(3)   |
| C33–C34               | 1.415(10)         | N2–C13–C8   | 121.5(3)   |
| C34–C35               | 1.394(10)         | N2–C13–C12  | 114.2(2)   |
| C35–C36               | 1.394(10)         | C8–C13–C12  | 124.2(3)   |
|                       |                   | N1–C18–C20  | 110.6(2)   |
|                       |                   | N1–C18–C19  | 110.5(2)   |
|                       |                   | C20–C18–C19 | 112.1(2)   |
| <b>Atom–Atom–Atom</b> | <b>Angle [°]</b>  | N3–C21–C23  | 110.4(3)   |
| N4–Ta1–N3             | 107.4(3)          | N3–C21–C22  | 110.2(3)   |
| N4A–Ta1–N3            | 111.5(6)          | C23–C21–C22 | 112.2(3)   |
| N4–Ta1–N1             | 106.6(4)          | C24–N4–Ta1  | 173.6(10)  |
| N4A–Ta1–N1            | 102.6(7)          | N4–C24–C25  | 119.9(9)   |
| N3–Ta1–N1             | 145.74(9)         | N4–C24–C29  | 121.6(9)   |
| N4–Ta1–N2             | 179.2(6)          | C25–C24–C29 | 118.5(5)   |
| N4A–Ta1–N2            | 175.5(6)          |             |            |

|                |           |                |           |
|----------------|-----------|----------------|-----------|
| C26–C25–C24    | 120.9(5)  | C26A–C27A–C28A | 121.2(9)  |
| C25–C26–C27    | 119.9(6)  | C29A–C28A–C27A | 120.3(10) |
| C28–C27–C26    | 121.3(5)  | C28A–C29A–C24A | 119.6(9)  |
| C27–C28–C29    | 119.2(6)  | C32–C31–C36    | 116.2(10) |
| C24–C29–C28    | 120.2(5)  | C32–C31–C30    | 116.8(11) |
| C24A–N4A–Ta1   | 171(3)    | C36–C31–C30    | 126.9(10) |
| N4A–C24A–C29A  | 119.4(17) | C31–C32–C33    | 123.6(12) |
| N4A–C24A–C25A  | 121.2(17) | C32–C33–C34    | 118.0(10) |
| C29A–C24A–C25A | 119.4(9)  | C35–C34–C33    | 120.3(10) |
| C26A–C25A–C24A | 120.6(10) | C34–C35–C36    | 116.8(11) |
| C27A–C26A–C25A | 118.7(11) | C31–C36–C35    | 125.0(11) |

Bonds to hydrogen atoms were omitted.

**Table S4.** Torsion angles for **3**.

| <u>Atom–Atom–Atom–Atom</u> | <u>Torsion Angle [°]</u> |                     |            |
|----------------------------|--------------------------|---------------------|------------|
| C13–N2–C1–C6               | 5.4(4)                   | C10–C11–C12–N3      | –180.0(3)  |
| Ta1–N2–C1–C6               | 178.9(2)                 | C10–C11–C12–C13     | –1.1(4)    |
| C13–N2–C1–C2               | –171.7(2)                | C1–N2–C13–C8        | –2.0(4)    |
| Ta1–N2–C1–C2               | 1.7(3)                   | Ta1–N2–C13–C8       | –175.4(2)  |
| C18–N1–C2–C3               | –5.2(4)                  | C1–N2–C13–C12       | 174.1(3)   |
| Ta1–N1–C2–C3               | 177.2(2)                 | Ta1–N2–C13–C12      | 0.7(3)     |
| C18–N1–C2–C1               | 173.3(2)                 | C9–C8–C13–N2        | 170.8(3)   |
| Ta1–N1–C2–C1               | –4.3(3)                  | C7–C8–C13–N2        | –14.2(4)   |
| N2–C1–C2–N1                | 1.6(4)                   | C9–C8–C13–C12       | –4.8(4)    |
| C6–C1–C2–N1                | –175.4(3)                | C7–C8–C13–C12       | 170.2(3)   |
| N2–C1–C2–C3                | –179.7(2)                | N3–C12–C13–N2       | 7.9(4)     |
| C6–C1–C2–C3                | 3.3(4)                   | C11–C12–C13–N2      | –171.1(2)  |
| N1–C2–C3–C4                | 176.0(3)                 | N3–C12–C13–C8       | –176.2(3)  |
| C1–C2–C3–C4                | –2.6(4)                  | C11–C12–C13–C8      | 4.8(4)     |
| C2–C3–C4–C5                | 0.2(4)                   | C2–N1–C18–C20       | –119.7(3)  |
| C2–C3–C4–C14               | 179.7(3)                 | Ta1–N1–C18–C20      | 57.8(3)    |
| C3–C4–C5–C6                | 1.9(4)                   | C2–N1–C18–C19       | 115.6(3)   |
| C14–C4–C5–C6               | –177.7(3)                | Ta1–N1–C18–C19      | –66.9(3)   |
| C4–C5–C6–C1                | –1.2(4)                  | C12–N3–C21–C23      | 93.2(3)    |
| C4–C5–C6–C7                | 172.6(3)                 | Ta1–N3–C21–C23      | –76.4(3)   |
| N2–C1–C6–C5                | –178.3(3)                | C12–N3–C21–C22      | –142.3(3)  |
| C2–C1–C6–C5                | –1.4(4)                  | Ta1–N3–C21–C22      | 48.1(3)    |
| N2–C1–C6–C7                | 7.5(4)                   | N4–C24–C25–C26      | –179.1(7)  |
| C2–C1–C6–C7                | –175.6(2)                | C29–C24–C25–C26     | –0.5(13)   |
| C5–C6–C7–C8                | 165.0(3)                 | C24–C25–C26–C27     | 1.5(10)    |
| C1–C6–C7–C8                | –21.3(3)                 | C25–C26–C27–C28     | –1.0(9)    |
| C5–C6–C7–C16               | 38.3(4)                  | C26–C27–C28–C29     | –0.6(10)   |
| C1–C6–C7–C16               | –148.0(3)                | N4–C24–C29–C28      | 177.5(7)   |
| C5–C6–C7–C15               | –79.8(3)                 | C25–C24–C29–C28     | –1.1(13)   |
| C1–C6–C7–C15               | 94.0(3)                  | C27–C28–C29–C24     | 1.6(11)    |
| C16–C7–C8–C9               | –34.8(4)                 | N4A–C24A–C25A–C26A  | –175.6(14) |
| C6–C7–C8–C9                | –161.1(3)                | C29A–C24A–C25A–C26A | 3(2)       |
| C15–C7–C8–C9               | 83.8(3)                  | C24A–C25A–C26A–C27A | –4(2)      |
| C16–C7–C8–C13              | 150.7(3)                 | C25A–C26A–C27A–C28A | 3(2)       |
| C6–C7–C8–C13               | 24.4(4)                  | C26A–C27A–C28A–C29A | –1.2(19)   |
| C15–C7–C8–C13              | –90.7(3)                 | C27A–C28A–C29A–C24A | 0(2)       |
| C13–C8–C9–C10              | 1.1(4)                   | N4A–C24A–C29A–C28A  | 177.8(13)  |
| C7–C8–C9–C10               | –173.5(3)                | C25A–C24A–C29A–C28A | –1(2)      |
| C8–C9–C10–C11              | 2.4(5)                   | C36–C31–C32–C33     | –3.1(15)   |
| C8–C9–C10–C17              | –179.3(3)                | C30–C31–C32–C33     | 175.0(11)  |
| C9–C10–C11–C12             | –2.3(5)                  | C31–C32–C33–C34     | 4.0(16)    |
| C17–C10–C11–C12            | 179.4(3)                 | C32–C33–C34–C35     | –2.0(16)   |
| C21–N3–C12–C11             | –4.4(4)                  | C33–C34–C35–C36     | –0.6(15)   |
| Ta1–N3–C12–C11             | 165.9(2)                 | C32–C31–C36–C35     | 0.1(17)    |
| C21–N3–C12–C13             | 176.8(3)                 | C30–C31–C36–C35     | –177.7(13) |
| Ta1–N3–C12–C13             | –12.9(3)                 | C34–C35–C36–C31     | 1.6(16)    |

Bonds to hydrogen atoms were omitted.

## Crystallographic details of 4

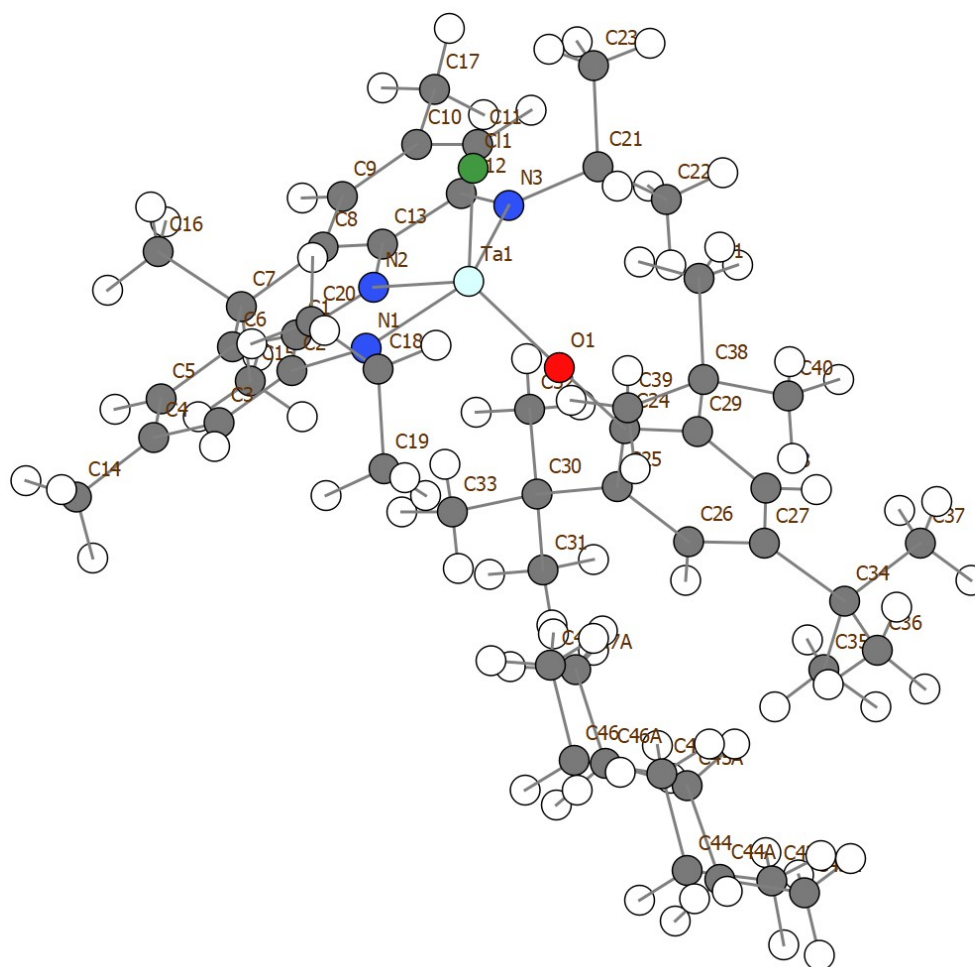

A red, plate-shaped crystal was mounted on a MiTeGen micromount with perfluoroether oil. Data for mo\_ja24\_sp\_ii\_93\_3\_0m\_a were collected from a shock-cooled single crystal at 100(2) K on a Bruker D8 VENTURE dual wavelength Mo/Cu three-circle diffractometer with a microfocus sealed X-ray tube using a mirror optics as monochromator and a Bruker PHOTON III detector. The diffractometer was equipped with an Oxford Cryostream 800 low temperature device and used MoK $\alpha$  radiation ( $\lambda = 0.71073$  Å). All data were integrated with [No\_computing\_data\_reduction given] and a multi-scan absorption correction using SADABS 2016/2 was applied.<sup>[1,2]</sup> The structure was solved by direct methods with SHELXT and refined by full-matrix least-squares methods against  $F^2$  using SHELXL-2019/2.<sup>[3,4]</sup> All non-hydrogen atoms were refined with anisotropic displacement parameters. All hydrogen atoms were refined isotropic on calculated positions using a riding model with their  $U_{iso}$  values constrained to 1.5 times the  $U_{eq}$  of their pivot atoms for terminal sp<sup>3</sup> carbon atoms and 1.2 times for all other carbon atoms. Crystallographic data for the structures reported in this paper have been deposited with the Cambridge Crystallographic Data Centre.<sup>[5]</sup> CCDC 2402128 contain the supplementary crystallographic data for this paper. These data can be obtained free of charge from The Cambridge Crystallographic Data Centre via [www.ccdc.cam.ac.uk/structures](http://www.ccdc.cam.ac.uk/structures). This report and the CIF file were generated using FinalCif.<sup>[6]</sup>



**Table S5.** Crystal data and structure refinement for mo\_ja24\_sp\_ii\_93\_3\_0m\_a (4).

|                                                                   |                                                                                |
|-------------------------------------------------------------------|--------------------------------------------------------------------------------|
| CCDC number                                                       | 2402128                                                                        |
| Empirical formula                                                 | C <sub>46</sub> H <sub>71</sub> CIN <sub>3</sub> OTa                           |
| Formula weight                                                    | 898.45                                                                         |
| Temperature [K]                                                   | 100(2)                                                                         |
| Crystal system                                                    | monoclinic                                                                     |
| Space group (number)                                              | <i>P</i> 2 <sub>1</sub> / <i>c</i> (14)                                        |
| <i>a</i> [Å]                                                      | 14.7961(3)                                                                     |
| <i>b</i> [Å]                                                      | 17.6077(4)                                                                     |
| <i>c</i> [Å]                                                      | 17.5721(3)                                                                     |
| α [°]                                                             | 90                                                                             |
| β [°]                                                             | 108.6340(10)                                                                   |
| γ [°]                                                             | 90                                                                             |
| Volume [Å <sup>3</sup> ]                                          | 4337.99(15)                                                                    |
| <i>Z</i>                                                          | 4                                                                              |
| ρ <sub>calc</sub> [gcm <sup>-3</sup> ]                            | 1.376                                                                          |
| μ [mm <sup>-1</sup> ]                                             | 2.632                                                                          |
| <i>F</i> (000)                                                    | 1864                                                                           |
| Crystal size [mm <sup>3</sup> ]                                   | 0.030×0.110×0.130                                                              |
| Crystal colour                                                    | red                                                                            |
| Crystal shape                                                     | plate                                                                          |
| Radiation                                                         | MoK <sub>α</sub> (λ=0.71073 Å)                                                 |
| 2θ range [°]                                                      | 4.63 to 50.81 (0.83 Å)                                                         |
| Index ranges                                                      | -17 ≤ <i>h</i> ≤ 17<br>-21 ≤ <i>k</i> ≤ 21<br>-20 ≤ <i>l</i> ≤ 21              |
| Reflections collected                                             | 132145                                                                         |
| Independent reflections                                           | 7961<br><i>R</i> <sub>int</sub> = 0.0608<br><i>R</i> <sub>sigma</sub> = 0.0207 |
| Completeness to θ = 25.242°                                       | 99.9 %                                                                         |
| Data / Restraints / Parameters                                    | 7961 / 0 / 470                                                                 |
| Absorption correction T <sub>min</sub> /T <sub>max</sub> (method) | 0.6419 / 0.7452<br>(multi-scan)                                                |
| Goodness-of-fit on <i>F</i> <sup>2</sup>                          | 0.979                                                                          |
| Final <i>R</i> indexes                                            | <i>R</i> <sub>1</sub> = 0.0190                                                 |
| [ <i>I</i> ≥ 2σ( <i>I</i> )]                                      | w <i>R</i> <sub>2</sub> = 0.0434                                               |
| Final <i>R</i> indexes                                            | <i>R</i> <sub>1</sub> = 0.0219                                                 |
| [all data]                                                        | w <i>R</i> <sub>2</sub> = 0.0456                                               |
| Largest peak/hole [eÅ <sup>-3</sup> ]                             | 0.75/-0.48                                                                     |

| Table                 | S6. | Bond Length [Å]  | lengths | and         | angles     | for | 4. |
|-----------------------|-----|------------------|---------|-------------|------------|-----|----|
| <b>Atom–Atom</b>      |     |                  |         |             |            |     |    |
| Ta1–O1                |     | 1.8984(15)       |         | O1–Ta1–N2   | 121.55(7)  |     |    |
| Ta1–N1                |     | 2.0080(19)       |         | N1–Ta1–N2   | 72.63(7)   |     |    |
| Ta1–N3                |     | 2.0138(19)       |         | N3–Ta1–N2   | 72.81(7)   |     |    |
| Ta1–N2                |     | 2.0316(19)       |         | O1–Ta1–Cl1  | 116.40(5)  |     |    |
| Ta1–Cl1               |     | 2.3349(6)        |         | N1–Ta1–Cl1  | 97.58(6)   |     |    |
| O1–C24                |     | 1.388(3)         |         | N3–Ta1–Cl1  | 95.25(6)   |     |    |
| N1–C2                 |     | 1.400(3)         |         | N2–Ta1–Cl1  | 122.04(6)  |     |    |
| N1–C18                |     | 1.478(3)         |         | C24–O1–Ta1  | 166.46(15) |     |    |
| N2–C13                |     | 1.390(3)         |         | C2–N1–C18   | 123.40(19) |     |    |
| N2–C1                 |     | 1.394(3)         |         | C2–N1–Ta1   | 123.70(15) |     |    |
| N3–C12                |     | 1.400(3)         |         | C18–N1–Ta1  | 112.90(14) |     |    |
| N3–C21                |     | 1.483(3)         |         | C13–N2–C1   | 116.33(19) |     |    |
| C1–C6                 |     | 1.386(3)         |         | C13–N2–Ta1  | 121.96(15) |     |    |
| C1–C2                 |     | 1.400(3)         |         | C1–N2–Ta1   | 121.71(15) |     |    |
| C2–C3                 |     | 1.391(3)         |         | C12–N3–C21  | 122.42(19) |     |    |
| C3–C4                 |     | 1.397(3)         |         | C12–N3–Ta1  | 123.40(15) |     |    |
| C4–C5                 |     | 1.395(3)         |         | C21–N3–Ta1  | 114.14(15) |     |    |
| C4–C14                |     | 1.513(3)         |         | C6–C1–N2    | 125.1(2)   |     |    |
| C5–C6                 |     | 1.397(3)         |         | C6–C1–C2    | 123.0(2)   |     |    |
| C6–C7                 |     | 1.541(3)         |         | N2–C1–C2    | 111.9(2)   |     |    |
| C7–C8                 |     | 1.530(3)         |         | C3–C2–N1    | 131.1(2)   |     |    |
| C7–C16                |     | 1.536(3)         |         | C3–C2–C1    | 119.2(2)   |     |    |
| C7–C15                |     | 1.540(3)         |         | N1–C2–C1    | 109.66(19) |     |    |
| C8–C13                |     | 1.384(3)         |         | C2–C3–C4    | 119.2(2)   |     |    |
| C8–C9                 |     | 1.398(3)         |         | C5–C4–C3    | 120.0(2)   |     |    |
| C9–C10                |     | 1.392(3)         |         | C5–C4–C14   | 120.3(2)   |     |    |
| C10–C11               |     | 1.402(3)         |         | C3–C4–C14   | 119.7(2)   |     |    |
| C10–C17               |     | 1.509(3)         |         | C4–C5–C6    | 122.0(2)   |     |    |
| C11–C12               |     | 1.391(3)         |         | C1–C6–C5    | 116.5(2)   |     |    |
| C12–C13               |     | 1.406(3)         |         | C1–C6–C7    | 121.1(2)   |     |    |
| C18–C19               |     | 1.530(3)         |         | C5–C6–C7    | 122.3(2)   |     |    |
| C18–C20               |     | 1.531(3)         |         | C8–C7–C16   | 109.89(19) |     |    |
| C21–C22               |     | 1.525(3)         |         | C8–C7–C15   | 108.64(19) |     |    |
| C21–C23               |     | 1.529(3)         |         | C16–C7–C15  | 109.4(2)   |     |    |
| C24–C25               |     | 1.415(3)         |         | C8–C7–C6    | 110.49(19) |     |    |
| C24–C29               |     | 1.420(3)         |         | C16–C7–C6   | 109.67(18) |     |    |
| C25–C26               |     | 1.400(3)         |         | C15–C7–C6   | 108.73(19) |     |    |
| C25–C30               |     | 1.542(3)         |         | C13–C8–C9   | 116.7(2)   |     |    |
| C26–C27               |     | 1.387(3)         |         | C13–C8–C7   | 121.5(2)   |     |    |
| C27–C28               |     | 1.390(3)         |         | C9–C8–C7    | 121.8(2)   |     |    |
| C27–C34               |     | 1.541(3)         |         | C10–C9–C8   | 121.9(2)   |     |    |
| C28–C29               |     | 1.397(3)         |         | C9–C10–C11  | 120.2(2)   |     |    |
| C29–C38               |     | 1.544(3)         |         | C9–C10–C17  | 120.7(2)   |     |    |
| C30–C31               |     | 1.537(3)         |         | C11–C10–C17 | 119.1(2)   |     |    |
| C30–C32               |     | 1.537(3)         |         | C12–C11–C10 | 119.1(2)   |     |    |
| C30–C33               |     | 1.538(3)         |         | C11–C12–N3  | 131.1(2)   |     |    |
| C34–C36               |     | 1.528(4)         |         | C11–C12–C13 | 119.0(2)   |     |    |
| C34–C35               |     | 1.530(4)         |         | N3–C12–C13  | 109.9(2)   |     |    |
| C34–C37               |     | 1.536(4)         |         | C8–C13–N2   | 125.1(2)   |     |    |
| C38–C39               |     | 1.538(3)         |         | C8–C13–C12  | 123.0(2)   |     |    |
| C38–C40               |     | 1.539(3)         |         | N2–C13–C12  | 111.9(2)   |     |    |
| C38–C41               |     | 1.540(3)         |         | N1–C18–C19  | 113.57(19) |     |    |
| C43–C44               |     | 1.513(8)         |         | N1–C18–C20  | 111.09(19) |     |    |
| C44–C45               |     | 1.515(7)         |         | C19–C18–C20 | 114.1(2)   |     |    |
| C45–C46               |     | 1.557(7)         |         | N3–C21–C22  | 113.1(2)   |     |    |
| C46–C47               |     | 1.506(7)         |         | N3–C21–C23  | 111.80(19) |     |    |
| C43A–C44A             |     | 1.487(15)        |         | C22–C21–C23 | 114.1(2)   |     |    |
| C44A–C45A             |     | 1.517(14)        |         | O1–C24–C25  | 120.9(2)   |     |    |
| C45A–C46A             |     | 1.557(14)        |         | O1–C24–C29  | 117.8(2)   |     |    |
| C46A–C47A             |     | 1.508(14)        |         | C25–C24–C29 | 121.3(2)   |     |    |
|                       |     |                  |         | C26–C25–C24 | 117.0(2)   |     |    |
|                       |     |                  |         | C26–C25–C30 | 118.4(2)   |     |    |
| <b>Atom–Atom–Atom</b> |     | <b>Angle [°]</b> |         | C24–C25–C30 | 124.7(2)   |     |    |
| O1–Ta1–N1             |     | 101.48(7)        |         | C27–C26–C25 | 123.7(2)   |     |    |
| O1–Ta1–N3             |     | 101.77(7)        |         | C26–C27–C28 | 117.2(2)   |     |    |
| N1–Ta1–N3             |     | 144.86(8)        |         | C26–C27–C34 | 122.3(2)   |     |    |

|             |            |                |            |
|-------------|------------|----------------|------------|
| C28–C27–C34 | 120.5(2)   | C35–C34–C27    | 112.4(2)   |
| C27–C28–C29 | 123.2(2)   | C37–C34–C27    | 109.2(2)   |
| C28–C29–C24 | 117.3(2)   | C39–C38–C40    | 106.62(19) |
| C28–C29–C38 | 119.3(2)   | C39–C38–C41    | 110.7(2)   |
| C24–C29–C38 | 123.4(2)   | C40–C38–C41    | 106.1(2)   |
| C31–C30–C32 | 106.0(2)   | C39–C38–C29    | 109.26(19) |
| C31–C30–C33 | 105.8(2)   | C40–C38–C29    | 112.35(19) |
| C32–C30–C33 | 112.1(2)   | C41–C38–C29    | 111.65(19) |
| C31–C30–C25 | 112.61(19) | C43–C44–C45    | 113.9(5)   |
| C32–C30–C25 | 109.70(19) | C44–C45–C46    | 114.6(4)   |
| C33–C30–C25 | 110.5(2)   | C47–C46–C45    | 112.9(4)   |
| C36–C34–C35 | 108.0(2)   | C43A–C44A–C45A | 111.0(12)  |
| C36–C34–C37 | 108.5(2)   | C44A–C45A–C46A | 113.3(10)  |
| C35–C34–C37 | 108.3(2)   | C47A–C46A–C45A | 111.4(11)  |
| C36–C34–C27 | 110.4(2)   |                |            |

**Table S7.** Torsion angles for **4**.

| <b>Atom–Atom–Atom–Atom</b> | <b>Torsion Angle [°]</b> |                 |             |
|----------------------------|--------------------------|-----------------|-------------|
| N1–Ta1–O1–C24              | 112.3(6)                 | Ta1–N3–C12–C11  | 179.21(19)  |
| N3–Ta1–O1–C24              | -41.2(6)                 | C21–N3–C12–C13  | 176.2(2)    |
| N2–Ta1–O1–C24              | 35.8(6)                  | Ta1–N3–C12–C13  | -1.4(3)     |
| Cl1–Ta1–O1–C24             | -143.1(6)                | C9–C8–C13–N2    | 177.6(2)    |
| C13–N2–C1–C6               | 4.0(3)                   | C7–C8–C13–N2    | -3.4(3)     |
| Ta1–N2–C1–C6               | -175.04(17)              | C9–C8–C13–C12   | -2.2(3)     |
| C13–N2–C1–C2               | -175.86(19)              | C7–C8–C13–C12   | 176.8(2)    |
| Ta1–N2–C1–C2               | 5.1(3)                   | C1–N2–C13–C8    | -2.2(3)     |
| C18–N1–C2–C3               | -6.8(4)                  | Ta1–N2–C13–C8   | 176.81(17)  |
| Ta1–N1–C2–C3               | 173.91(19)               | C1–N2–C13–C12   | 177.57(19)  |
| C18–N1–C2–C1               | 175.2(2)                 | Ta1–N2–C13–C12  | -3.4(3)     |
| Ta1–N1–C2–C1               | -4.1(3)                  | C11–C12–C13–C8  | 2.1(3)      |
| C6–C1–C2–C3                | 1.2(3)                   | N3–C12–C13–C8   | -177.4(2)   |
| N2–C1–C2–C3                | -178.9(2)                | C11–C12–C13–N2  | -177.7(2)   |
| C6–C1–C2–N1                | 179.5(2)                 | N3–C12–C13–N2   | 2.8(3)      |
| N2–C1–C2–N1                | -0.7(3)                  | C2–N1–C18–C19   | 65.3(3)     |
| N1–C2–C3–C4                | -177.5(2)                | Ta1–N1–C18–C19  | -115.34(19) |
| C1–C2–C3–C4                | 0.3(3)                   | C2–N1–C18–C20   | -65.0(3)    |
| C2–C3–C4–C5                | -1.5(3)                  | Ta1–N1–C18–C20  | 114.42(18)  |
| C2–C3–C4–C14               | 177.2(2)                 | C12–N3–C21–C22  | -63.1(3)    |
| C3–C4–C5–C6                | 1.1(3)                   | Ta1–N3–C21–C22  | 114.60(19)  |
| C14–C4–C5–C6               | -177.5(2)                | C12–N3–C21–C23  | 67.4(3)     |
| N2–C1–C6–C5                | 178.7(2)                 | Ta1–N3–C21–C23  | -114.92(19) |
| C2–C1–C6–C5                | -1.5(3)                  | Ta1–O1–C24–C25  | -34.7(7)    |
| N2–C1–C6–C7                | -0.1(3)                  | Ta1–O1–C24–C29  | 145.7(5)    |
| C2–C1–C6–C7                | 179.7(2)                 | O1–C24–C25–C26  | 174.6(2)    |
| C4–C5–C6–C1                | 0.3(3)                   | C29–C24–C25–C26 | -5.8(3)     |
| C4–C5–C6–C7                | 179.1(2)                 | O1–C24–C25–C30  | -5.2(3)     |
| C1–C6–C7–C8                | -4.9(3)                  | C29–C24–C25–C30 | 174.4(2)    |
| C5–C6–C7–C8                | 176.4(2)                 | C24–C25–C26–C27 | 1.2(4)      |
| C1–C6–C7–C16               | -126.2(2)                | C30–C25–C26–C27 | -179.1(2)   |
| C5–C6–C7–C16               | 55.1(3)                  | C25–C26–C27–C28 | 2.7(4)      |
| C1–C6–C7–C15               | 114.2(2)                 | C25–C26–C27–C34 | -177.0(2)   |
| C5–C6–C7–C15               | -64.5(3)                 | C26–C27–C28–C29 | -2.0(4)     |
| C16–C7–C8–C13              | 127.7(2)                 | C34–C27–C28–C29 | 177.7(2)    |
| C15–C7–C8–C13              | -112.7(2)                | C27–C28–C29–C24 | -2.4(4)     |
| C6–C7–C8–C13               | 6.6(3)                   | C27–C28–C29–C38 | 175.6(2)    |
| C16–C7–C8–C9               | -53.3(3)                 | O1–C24–C29–C28  | -173.9(2)   |
| C15–C7–C8–C9               | 66.3(3)                  | C25–C24–C29–C28 | 6.4(3)      |
| C6–C7–C8–C9                | -174.5(2)                | O1–C24–C29–C38  | 8.1(3)      |
| C13–C8–C9–C10              | 0.2(3)                   | C25–C24–C29–C38 | -171.5(2)   |
| C7–C8–C9–C10               | -178.9(2)                | C26–C25–C30–C31 | 7.0(3)      |
| C8–C9–C10–C11              | 1.9(4)                   | C24–C25–C30–C31 | -173.3(2)   |
| C8–C9–C10–C17              | -178.7(2)                | C26–C25–C30–C32 | -110.8(2)   |
| C9–C10–C11–C12             | -2.0(3)                  | C24–C25–C30–C32 | 69.0(3)     |
| C17–C10–C11–C12            | 178.6(2)                 | C26–C25–C30–C33 | 125.1(2)    |
| C10–C11–C12–N3             | 179.4(2)                 | C24–C25–C30–C33 | -55.2(3)    |
| C10–C11–C12–C13            | 0.0(3)                   | C26–C27–C34–C36 | -132.7(3)   |
| C21–N3–C12–C11             | -3.3(4)                  | C28–C27–C34–C36 | 47.6(3)     |
|                            |                          | C26–C27–C34–C35 | -12.1(3)    |

|                 |           |                     |            |
|-----------------|-----------|---------------------|------------|
| C28-C27-C34-C35 | 168.2(2)  | C28-C29-C38-C41     | 120.2(2)   |
| C26-C27-C34-C37 | 108.1(3)  | C24-C29-C38-C41     | -61.9(3)   |
| C28-C27-C34-C37 | -71.6(3)  | C43-C44-C45-C46     | 177.9(5)   |
| C28-C29-C38-C39 | -117.0(2) | C44-C45-C46-C47     | 179.2(5)   |
| C24-C29-C38-C39 | 60.9(3)   | C43A-C44A-C45A-C46A | -172.1(13) |
| C28-C29-C38-C40 | 1.1(3)    |                     |            |
| C24-C29-C38-C40 | 179.0(2)  |                     |            |

## Crystallographic Details of 5

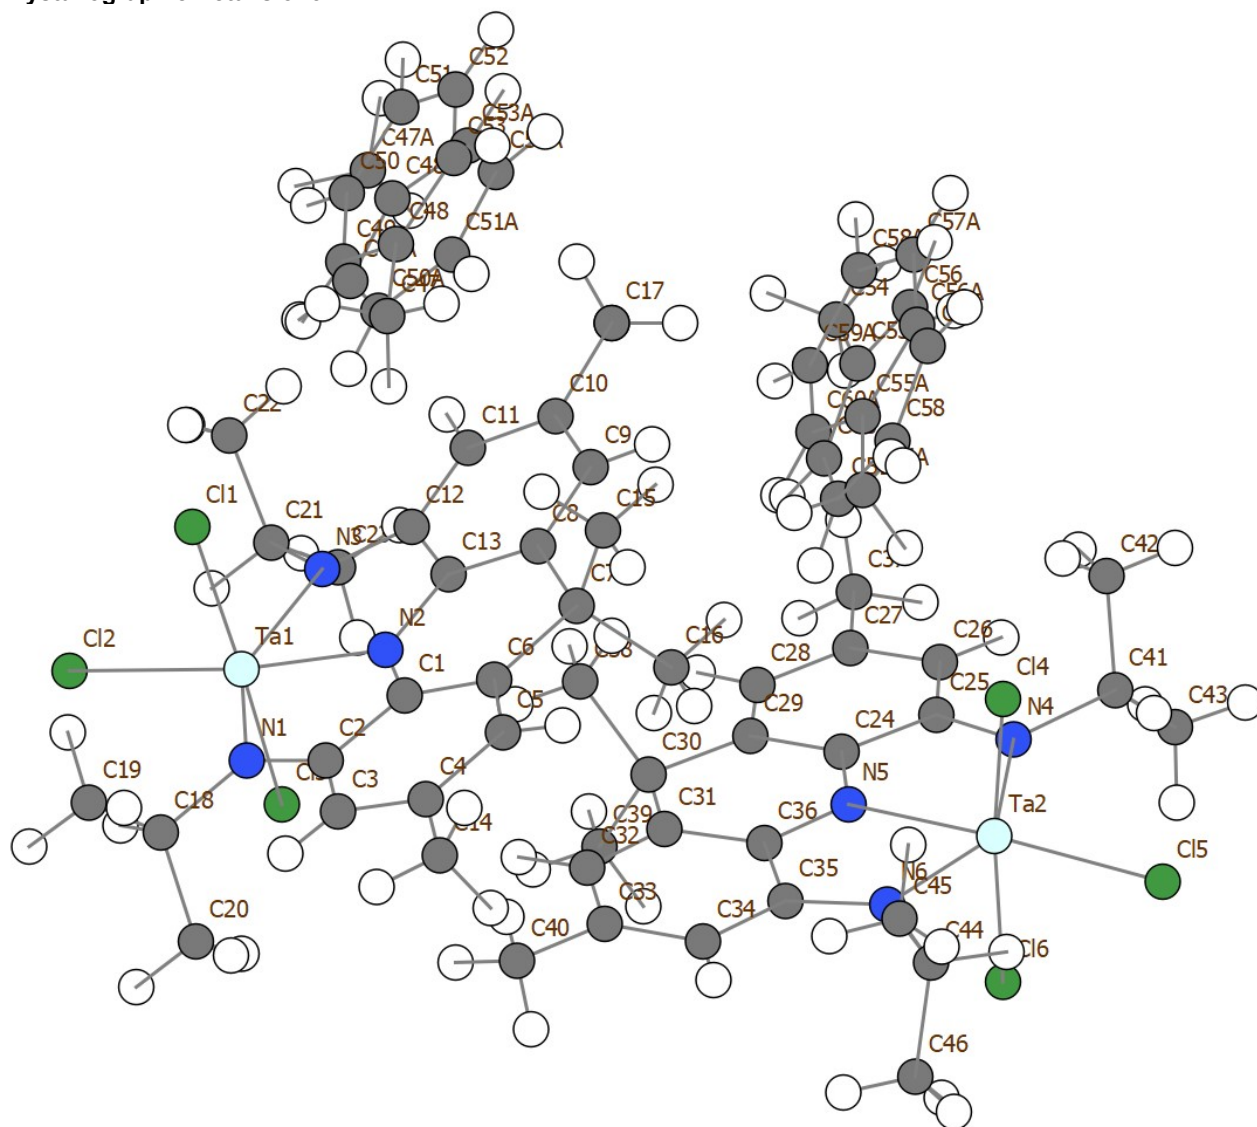

A green, block-shaped crystal of mo\_ja24\_sp\_iii\_01\_0ma\_a (**5**) was mounted on a MiTeGen micromount with perfluoroether oil. Data were collected from a shock-cooled single crystal at 102(2) K on a Bruker D8 VENTURE dual wavelength Mo/Cu three-circle diffractometer with a microfocus sealed X-ray tube using a mirror optics as monochromator and a Bruker PHOTON III detector. The diffractometer was equipped with an Oxford Cryostream 800 low temperature device and used MoK $\alpha$  radiation ( $\lambda = 0.71073$  Å). All data were integrated with SAINT and a multi-scan absorption correction using SADABS was applied.<sup>[12,13]</sup> The structure was solved by direct methods using SHELXT and refined by full-matrix least-squares methods against  $F^2$  by SHELXL-2019/2.<sup>[15,15]</sup> All non-hydrogen atoms were refined with anisotropic displacement parameters. All C-bound hydrogen atoms were refined isotropic on calculated positions using a riding model with their  $U_{iso}$  values constrained to 1.5 times the  $U_{eq}$  of their pivot atoms for terminal sp<sup>3</sup> carbon atoms and 1.2 times for all other carbon atoms. Disordered moieties were refined using bond lengths restraints and displacement parameter restraints. Crystallographic data for the structures reported here have been deposited with the Cambridge Crystallographic Data Centre.<sup>[16]</sup> CCDC 2383360 contain the supplementary crystallographic data for this paper. These data can be obtained free of charge from The Cambridge Crystallographic Data Centre via [www.ccdc.cam.ac.uk/structures](http://www.ccdc.cam.ac.uk/structures). This report and the CIF file were generated using FinalCif.<sup>[17]</sup>

**Table S7.** Crystal data and structure refinement for mo\_ja24\_sp\_iii\_01\_0ma\_a (5).

|                                                            |                                                                                 |
|------------------------------------------------------------|---------------------------------------------------------------------------------|
| CCDC number                                                | 2383360                                                                         |
| Empirical formula                                          | C <sub>30</sub> H <sub>38</sub> Cl <sub>3</sub> N <sub>3</sub> Ta               |
| Formula weight                                             | 727.93                                                                          |
| Temperature [K]                                            | 102(2)                                                                          |
| Crystal system                                             | monoclinic                                                                      |
| Space group (number)                                       | <i>P</i> 2 <sub>1</sub> / <i>c</i> (14)                                         |
| <i>a</i> [Å]                                               | 21.2427(5)                                                                      |
| <i>b</i> [Å]                                               | 17.3990(5)                                                                      |
| <i>c</i> [Å]                                               | 16.6559(4)                                                                      |
| $\alpha$ [°]                                               | 90                                                                              |
| $\beta$ [°]                                                | 100.4230(10)                                                                    |
| $\gamma$ [°]                                               | 90                                                                              |
| Volume [Å <sup>3</sup> ]                                   | 6054.5(3)                                                                       |
| <i>Z</i>                                                   | 8                                                                               |
| $\rho_{\text{calc}}$ [gcm <sup>-3</sup> ]                  | 1.597                                                                           |
| $\mu$ [mm <sup>-1</sup> ]                                  | 3.919                                                                           |
| <i>F</i> (000)                                             | 2904                                                                            |
| Crystal size [mm <sup>3</sup> ]                            | 0.150×0.060×0.060                                                               |
| Crystal colour                                             | green                                                                           |
| Crystal shape                                              | block                                                                           |
| Radiation                                                  | MoK $\alpha$ ( $\lambda$ =0.71073 Å)                                            |
| 2 $\theta$ range [°]                                       | 3.90 to 56.67 (0.75 Å)                                                          |
| Index ranges                                               | -27 ≤ <i>h</i> ≤ 28<br>-23 ≤ <i>k</i> ≤ 23<br>-22 ≤ <i>l</i> ≤ 22               |
| Reflections collected                                      | 109358                                                                          |
| Independent reflections                                    | 15075<br><i>R</i> <sub>int</sub> = 0.0900<br><i>R</i> <sub>sigma</sub> = 0.0519 |
| Completeness to $\theta = 25.242^\circ$                    | 100.0 %                                                                         |
| Data / Restraints / Parameters                             | 15075/90/665                                                                    |
| Absorption correction                                      | 0.6123/0.7457                                                                   |
| <i>T</i> <sub>min</sub> / <i>T</i> <sub>max</sub> (method) | multi-scan                                                                      |
| Goodness-of-fit on <i>F</i> <sup>2</sup>                   | 1.015                                                                           |
| Final <i>R</i> indexes                                     | <i>R</i> <sub>1</sub> = 0.0372                                                  |
| [ <i>I</i> ≥ 2 $\sigma$ ( <i>I</i> )]                      | <i>wR</i> <sub>2</sub> = 0.0756                                                 |
| Final <i>R</i> indexes                                     | <i>R</i> <sub>1</sub> = 0.0540                                                  |
| [all data]                                                 | <i>wR</i> <sub>2</sub> = 0.0842                                                 |
| Largest peak/hole [eÅ <sup>-3</sup> ]                      | 1.83/-1.47                                                                      |

**Table S8.** Bond lengths and angles for **5**.

| <b>Atom–Atom</b> | <b>Length [Å]</b> |                       |                  |
|------------------|-------------------|-----------------------|------------------|
| Ta1–N3           | 2.025(4)          | C41–C43               | 1.510(7)         |
| Ta1–N1           | 2.028(4)          | C44–C45               | 1.513(7)         |
| Ta1–N2           | 2.136(3)          | C44–C46               | 1.523(7)         |
| Ta1–Cl2          | 2.3747(12)        | C47–C48               | 1.506(11)        |
| Ta1–Cl3          | 2.3767(12)        | C48–C49               | 1.371(11)        |
| Ta1–Cl1          | 2.4284(12)        | C48–C53               | 1.375(10)        |
| Ta2–N6           | 2.033(3)          | C49–C50               | 1.396(12)        |
| Ta2–N4           | 2.036(3)          | C50–C51               | 1.351(11)        |
| Ta2–N5           | 2.142(3)          | C51–C52               | 1.375(11)        |
| Ta2–Cl4          | 2.3747(12)        | C52–C53               | 1.374(11)        |
| Ta2–Cl5          | 2.3961(12)        | C47A–C48A             | 1.523(16)        |
| Ta2–Cl6          | 2.4079(11)        | C48A–C53A             | 1.379(15)        |
| N1–C2            | 1.371(5)          | C48A–C49A             | 1.385(15)        |
| N1–C18           | 1.491(5)          | C49A–C50A             | 1.388(18)        |
| N2–C1            | 1.361(5)          | C50A–C51A             | 1.372(16)        |
| N2–C13           | 1.362(5)          | C51A–C52A             | 1.400(16)        |
| N3–C12           | 1.373(6)          | C52A–C53A             | 1.354(16)        |
| N3–C21           | 1.490(5)          | C54–C55               | 1.481(14)        |
| N4–C25           | 1.380(5)          | C55–C60               | 1.380(12)        |
| N4–C41           | 1.493(6)          | C55–C56               | 1.401(13)        |
| N5–C24           | 1.354(5)          | C56–C57               | 1.378(17)        |
| N5–C36           | 1.354(5)          | C57–C58               | 1.369(13)        |
| N6–C35           | 1.374(6)          | C58–C59               | 1.439(13)        |
| N6–C44           | 1.481(6)          | C59–C60               | 1.326(14)        |
| C1–C2            | 1.408(6)          | C54A–C55A             | 1.498(15)        |
| C1–C6            | 1.411(6)          | C55A–C60A             | 1.379(14)        |
| C2–C3            | 1.417(6)          | C55A–C56A             | 1.394(14)        |
| C3–C4            | 1.384(6)          | C56A–C57A             | 1.375(18)        |
| C4–C5            | 1.414(6)          | C57A–C58A             | 1.360(15)        |
| C4–C14           | 1.499(6)          | C58A–C59A             | 1.432(15)        |
| C5–C6            | 1.385(6)          | C59A–C60A             | 1.321(15)        |
| C6–C7            | 1.528(6)          |                       |                  |
| C7–C15           | 1.534(6)          | <b>Atom–Atom–Atom</b> | <b>Angle [°]</b> |
| C7–C8            | 1.540(6)          | N3–Ta1–N1             | 143.73(14)       |
| C7–C16           | 1.546(6)          | N3–Ta1–N2             | 71.77(14)        |
| C8–C9            | 1.381(6)          | N1–Ta1–N2             | 71.98(14)        |
| C8–C13           | 1.398(6)          | N3–Ta1–Cl2            | 109.70(11)       |
| C9–C10           | 1.417(6)          | N1–Ta1–Cl2            | 106.17(11)       |
| C10–C11          | 1.390(7)          | N2–Ta1–Cl2            | 169.62(10)       |
| C10–C17          | 1.505(6)          | N3–Ta1–Cl3            | 91.95(11)        |
| C11–C12          | 1.398(6)          | N1–Ta1–Cl3            | 92.44(11)        |
| C12–C13          | 1.422(6)          | N2–Ta1–Cl3            | 98.91(10)        |
| C18–C20          | 1.516(7)          | Cl2–Ta1–Cl3           | 91.35(5)         |
| C18–C19          | 1.526(7)          | N3–Ta1–Cl1            | 86.95(11)        |
| C21–C23          | 1.521(6)          | N1–Ta1–Cl1            | 90.38(11)        |
| C21–C22          | 1.522(6)          | N2–Ta1–Cl1            | 83.86(10)        |
| C24–C29          | 1.411(6)          | Cl2–Ta1–Cl1           | 85.95(5)         |
| C24–C25          | 1.413(6)          | Cl3–Ta1–Cl1           | 176.55(4)        |
| C25–C26          | 1.390(6)          | N6–Ta2–N4             | 143.53(14)       |
| C26–C27          | 1.394(7)          | N6–Ta2–N5             | 71.80(14)        |
| C27–C28          | 1.405(6)          | N4–Ta2–N5             | 71.89(14)        |
| C27–C37          | 1.512(6)          | N6–Ta2–Cl4            | 90.47(11)        |
| C28–C29          | 1.385(6)          | N4–Ta2–Cl4            | 92.06(11)        |
| C29–C30          | 1.533(6)          | N5–Ta2–Cl4            | 99.38(10)        |
| C30–C31          | 1.528(6)          | N6–Ta2–Cl5            | 112.55(11)       |
| C30–C38          | 1.536(6)          | N4–Ta2–Cl5            | 103.88(11)       |
| C30–C39          | 1.539(6)          | N5–Ta2–Cl5            | 170.99(10)       |
| C31–C32          | 1.376(6)          | Cl4–Ta2–Cl5           | 88.62(4)         |
| C31–C36          | 1.411(6)          | N6–Ta2–Cl6            | 90.21(11)        |
| C32–C33          | 1.410(6)          | N4–Ta2–Cl6            | 91.61(11)        |
| C33–C34          | 1.385(6)          | N5–Ta2–Cl6            | 87.58(10)        |
| C33–C40          | 1.507(6)          | Cl4–Ta2–Cl6           | 172.86(4)        |
| C34–C35          | 1.408(6)          | Cl5–Ta2–Cl6           | 84.56(4)         |
| C35–C36          | 1.423(6)          | C2–N1–C18             | 122.3(4)         |
| C41–C42          | 1.508(7)          | C2–N1–Ta1             | 123.3(3)         |
|                  |                   | C18–N1–Ta1            | 114.3(3)         |

|             |          |                |           |
|-------------|----------|----------------|-----------|
| C1–N2–C13   | 119.3(4) | C28–C27–C37    | 119.6(4)  |
| C1–N2–Ta1   | 119.5(3) | C29–C28–C27    | 121.8(4)  |
| C13–N2–Ta1  | 119.7(3) | C28–C29–C24    | 115.8(4)  |
| C12–N3–C21  | 123.2(4) | C28–C29–C30    | 123.2(4)  |
| C12–N3–Ta1  | 123.6(3) | C24–C29–C30    | 121.0(4)  |
| C21–N3–Ta1  | 113.2(3) | C31–C30–C29    | 111.2(4)  |
| C25–N4–C41  | 121.3(4) | C31–C30–C38    | 109.5(4)  |
| C25–N4–Ta2  | 122.8(3) | C29–C30–C38    | 108.2(4)  |
| C41–N4–Ta2  | 115.7(3) | C31–C30–C39    | 109.1(4)  |
| C24–N5–C36  | 120.1(4) | C29–C30–C39    | 109.0(4)  |
| C24–N5–Ta2  | 119.6(3) | C38–C30–C39    | 109.7(4)  |
| C36–N5–Ta2  | 120.1(3) | C32–C31–C36    | 116.1(4)  |
| C35–N6–C44  | 123.0(4) | C32–C31–C30    | 123.5(4)  |
| C35–N6–Ta2  | 123.9(3) | C36–C31–C30    | 120.4(4)  |
| C44–N6–Ta2  | 113.1(3) | C31–C32–C33    | 122.2(4)  |
| N2–C1–C2    | 112.5(4) | C34–C33–C32    | 120.9(4)  |
| N2–C1–C6    | 123.6(4) | C34–C33–C40    | 119.0(4)  |
| C2–C1–C6    | 123.9(4) | C32–C33–C40    | 120.1(4)  |
| N1–C2–C1    | 112.3(4) | C33–C34–C35    | 119.6(4)  |
| N1–C2–C3    | 129.9(4) | N6–C35–C34     | 130.8(4)  |
| C1–C2–C3    | 117.7(4) | N6–C35–C36     | 111.6(4)  |
| C4–C3–C2    | 119.5(4) | C34–C35–C36    | 117.6(4)  |
| C3–C4–C5    | 120.9(4) | N5–C36–C31     | 123.9(4)  |
| C3–C4–C14   | 120.4(4) | N5–C36–C35     | 112.6(4)  |
| C5–C4–C14   | 118.7(4) | C31–C36–C35    | 123.5(4)  |
| C6–C5–C4    | 121.9(4) | N4–C41–C42     | 111.4(4)  |
| C5–C6–C1    | 116.1(4) | N4–C41–C43     | 112.6(4)  |
| C5–C6–C7    | 123.1(4) | C42–C41–C43    | 114.9(4)  |
| C1–C6–C7    | 120.8(4) | N6–C44–C45     | 112.5(4)  |
| C6–C7–C15   | 109.7(4) | N6–C44–C46     | 111.7(4)  |
| C6–C7–C8    | 110.8(3) | C45–C44–C46    | 114.9(4)  |
| C15–C7–C8   | 109.7(4) | C49–C48–C53    | 118.5(8)  |
| C6–C7–C16   | 108.7(4) | C49–C48–C47    | 120.4(8)  |
| C15–C7–C16  | 109.9(4) | C53–C48–C47    | 121.1(8)  |
| C8–C7–C16   | 108.0(3) | C48–C49–C50    | 120.4(8)  |
| C9–C8–C13   | 116.3(4) | C51–C50–C49    | 120.6(9)  |
| C9–C8–C7    | 123.0(4) | C50–C51–C52    | 119.0(9)  |
| C13–C8–C7   | 120.7(4) | C53–C52–C51    | 120.8(9)  |
| C8–C9–C10   | 121.4(4) | C52–C53–C48    | 120.6(9)  |
| C11–C10–C9  | 121.2(4) | C53A–C48A–C49A | 118.2(14) |
| C11–C10–C17 | 119.8(4) | C53A–C48A–C47A | 119.9(15) |
| C9–C10–C17  | 118.9(4) | C49A–C48A–C47A | 121.4(15) |
| C10–C11–C12 | 119.2(4) | C48A–C49A–C50A | 121.5(16) |
| N3–C12–C11  | 130.4(4) | C51A–C50A–C49A | 118.9(16) |
| N3–C12–C13  | 111.7(4) | C50A–C51A–C52A | 119.8(15) |
| C11–C12–C13 | 117.8(4) | C53A–C52A–C51A | 120.2(16) |
| N2–C13–C8   | 124.0(4) | C52A–C53A–C48A | 121.3(15) |
| N2–C13–C12  | 112.0(4) | C60–C55–C56    | 116.2(12) |
| C8–C13–C12  | 124.0(4) | C60–C55–C54    | 124.0(11) |
| N1–C18–C20  | 112.4(4) | C56–C55–C54    | 119.7(11) |
| N1–C18–C19  | 111.2(4) | C57–C56–C55    | 121.1(12) |
| C20–C18–C19 | 115.4(4) | C58–C57–C56    | 120.9(12) |
| N3–C21–C23  | 111.6(4) | C57–C58–C59    | 118.4(12) |
| N3–C21–C22  | 112.4(4) | C60–C59–C58    | 118.4(12) |
| C23–C21–C22 | 114.7(4) | C59–C60–C55    | 125.0(12) |
| N5–C24–C29  | 123.2(4) | C60A–C55A–C56A | 117.5(14) |
| N5–C24–C25  | 112.8(4) | C60A–C55A–C54A | 123.3(13) |
| C29–C24–C25 | 124.1(4) | C56A–C55A–C54A | 119.2(14) |
| N4–C25–C26  | 130.4(4) | C57A–C56A–C55A | 119.7(15) |
| N4–C25–C24  | 112.0(4) | C58A–C57A–C56A | 122.2(14) |
| C26–C25–C24 | 117.6(4) | C57A–C58A–C59A | 117.3(14) |
| C25–C26–C27 | 119.9(4) | C60A–C59A–C58A | 119.8(14) |
| C26–C27–C28 | 120.8(4) | C59A–C60A–C55A | 123.4(14) |
| C26–C27–C37 | 119.6(4) |                |           |

Bonds to hydrogen atoms were omitted.



**Table S9.** Torsion angles for **5**.

| <b>Atom-Atom-Atom-Atom</b> | <b>Torsion Angle [°]</b> |                 |           |
|----------------------------|--------------------------|-----------------|-----------|
| C13-N2-C1-C2               | 170.9(4)                 | Ta1-N3-C21-C23  | -121.9(4) |
| Ta1-N2-C1-C2               | 5.1(5)                   | C12-N3-C21-C22  | -70.6(5)  |
| C13-N2-C1-C6               | -7.5(6)                  | Ta1-N3-C21-C22  | 107.6(4)  |
| Ta1-N2-C1-C6               | -173.2(3)                | C36-N5-C24-C29  | -1.0(6)   |
| C18-N1-C2-C1               | 171.2(4)                 | Ta2-N5-C24-C29  | 174.1(3)  |
| Ta1-N1-C2-C1               | -5.0(5)                  | C36-N5-C24-C25  | 179.0(4)  |
| C18-N1-C2-C3               | -10.1(7)                 | Ta2-N5-C24-C25  | -5.9(5)   |
| Ta1-N1-C2-C3               | 173.7(4)                 | C41-N4-C25-C26  | 14.7(7)   |
| N2-C1-C2-N1                | -0.4(5)                  | Ta2-N4-C25-C26  | -170.2(4) |
| C6-C1-C2-N1                | 178.0(4)                 | C41-N4-C25-C24  | -166.6(4) |
| N2-C1-C2-C3                | -179.2(4)                | Ta2-N4-C25-C24  | 8.5(5)    |
| C6-C1-C2-C3                | -0.9(6)                  | N5-C24-C25-N4   | -1.2(5)   |
| N1-C2-C3-C4                | -179.7(4)                | C29-C24-C25-N4  | 178.8(4)  |
| C1-C2-C3-C4                | -1.1(6)                  | N5-C24-C25-C26  | 177.7(4)  |
| C2-C3-C4-C5                | 1.6(7)                   | C29-C24-C25-C26 | -2.3(6)   |
| C2-C3-C4-C14               | -177.7(4)                | N4-C25-C26-C27  | 178.8(4)  |
| C3-C4-C5-C6                | -0.1(7)                  | C24-C25-C26-C27 | 0.2(7)    |
| C14-C4-C5-C6               | 179.2(4)                 | C25-C26-C27-C28 | 1.3(7)    |
| C4-C5-C6-C1                | -1.8(7)                  | C25-C26-C27-C37 | -179.6(4) |
| C4-C5-C6-C7                | 178.5(4)                 | C26-C27-C28-C29 | -0.8(7)   |
| N2-C1-C6-C5                | -179.5(4)                | C37-C27-C28-C29 | -179.8(5) |
| C2-C1-C6-C5                | 2.3(6)                   | C27-C28-C29-C24 | -1.2(7)   |
| N2-C1-C6-C7                | 0.2(6)                   | C27-C28-C29-C30 | 178.4(4)  |
| C2-C1-C6-C7                | -178.0(4)                | N5-C24-C29-C28  | -177.2(4) |
| C5-C6-C7-C15               | -51.4(6)                 | C25-C24-C29-C28 | 2.8(6)    |
| C1-C6-C7-C15               | 128.9(4)                 | N5-C24-C29-C30  | 3.2(6)    |
| C5-C6-C7-C8                | -172.6(4)                | C25-C24-C29-C30 | -176.8(4) |
| C1-C6-C7-C8                | 7.7(6)                   | C28-C29-C30-C31 | 179.1(4)  |
| C5-C6-C7-C16               | 68.9(5)                  | C24-C29-C30-C31 | -1.3(6)   |
| C1-C6-C7-C16               | -110.8(4)                | C28-C29-C30-C38 | -60.6(6)  |
| C6-C7-C8-C9                | 171.3(4)                 | C24-C29-C30-C38 | 119.0(4)  |
| C15-C7-C8-C9               | 50.0(6)                  | C28-C29-C30-C39 | 58.7(6)   |
| C16-C7-C8-C9               | -69.8(5)                 | C24-C29-C30-C39 | -121.7(4) |
| C6-C7-C8-C13               | -9.3(6)                  | C29-C30-C31-C32 | 178.0(4)  |
| C15-C7-C8-C13              | -130.5(4)                | C38-C30-C31-C32 | 58.5(6)   |
| C16-C7-C8-C13              | 109.7(4)                 | C39-C30-C31-C32 | -61.7(5)  |
| C13-C8-C9-C10              | -0.3(7)                  | C29-C30-C31-C36 | -2.5(6)   |
| C7-C8-C9-C10               | 179.2(4)                 | C38-C30-C31-C36 | -122.0(4) |
| C8-C9-C10-C11              | -2.3(7)                  | C39-C30-C31-C36 | 117.8(4)  |
| C8-C9-C10-C17              | 174.7(4)                 | C36-C31-C32-C33 | -2.7(6)   |
| C9-C10-C11-C12             | 2.7(7)                   | C30-C31-C32-C33 | 176.8(4)  |
| C17-C10-C11-C12            | -174.2(4)                | C31-C32-C33-C34 | -0.5(7)   |
| C21-N3-C12-C11             | 9.6(7)                   | C31-C32-C33-C40 | 177.9(4)  |
| Ta1-N3-C12-C11             | -168.4(4)                | C32-C33-C34-C35 | 2.3(7)    |
| C21-N3-C12-C13             | -173.2(4)                | C40-C33-C34-C35 | -176.1(4) |
| Ta1-N3-C12-C13             | 8.7(5)                   | C44-N6-C35-C34  | 1.8(7)    |
| C10-C11-C12-N3             | 176.3(4)                 | Ta2-N6-C35-C34  | -177.5(4) |
| C10-C11-C12-C13            | -0.7(6)                  | C44-N6-C35-C36  | -178.5(4) |
| C1-N2-C13-C8               | 5.7(6)                   | Ta2-N6-C35-C36  | 2.3(5)    |
| Ta1-N2-C13-C8              | 171.5(3)                 | C33-C34-C35-N6  | 178.9(4)  |
| C1-N2-C13-C12              | -174.1(4)                | C33-C34-C35-C36 | -0.9(6)   |
| Ta1-N2-C13-C12             | -8.4(5)                  | C24-N5-C36-C31  | -3.2(6)   |
| C9-C8-C13-N2               | -177.3(4)                | Ta2-N5-C36-C31  | -178.3(3) |
| C7-C8-C13-N2               | 3.2(6)                   | C24-N5-C36-C35  | 177.1(4)  |
| C9-C8-C13-C12              | 2.5(6)                   | Ta2-N5-C36-C35  | 2.0(5)    |
| C7-C8-C13-C12              | -177.0(4)                | C32-C31-C36-N5  | -175.5(4) |
| N3-C12-C13-N2              | 0.3(5)                   | C30-C31-C36-N5  | 5.0(6)    |
| C11-C12-C13-N2             | 177.8(4)                 | C32-C31-C36-C35 | 4.2(6)    |
| N3-C12-C13-C8              | -179.6(4)                | C30-C31-C36-C35 | -175.3(4) |
| C11-C12-C13-C8             | -2.0(6)                  | N6-C35-C36-N5   | -2.6(5)   |
| C2-N1-C18-C20              | -56.0(5)                 | C34-C35-C36-N5  | 177.2(4)  |
| Ta1-N1-C18-C20             | 120.5(4)                 | N6-C35-C36-C31  | 177.7(4)  |
| C2-N1-C18-C19              | 75.1(5)                  | C34-C35-C36-C31 | -2.5(6)   |
| Ta1-N1-C18-C19             | -108.4(4)                | C25-N4-C41-C42  | 57.2(6)   |
| C12-N3-C21-C23             | 59.9(6)                  | Ta2-N4-C41-C42  | -118.2(4) |
|                            |                          | C25-N4-C41-C43  | -73.5(5)  |

|                     |             |                     |            |
|---------------------|-------------|---------------------|------------|
| Ta2-N4-C41-C43      | 111.1(4)    | C49A-C48A-C53A-C52A | -5(3)      |
| C35-N6-C44-C45      | -63.9(6)    | C47A-C48A-C53A-C52A | -177(2)    |
| Ta2-N6-C44-C45      | 115.4(4)    | C60-C55-C56-C57     | 1(3)       |
| C35-N6-C44-C46      | 67.0(5)     | C54-C55-C56-C57     | 177.2(15)  |
| Ta2-N6-C44-C46      | -113.6(4)   | C55-C56-C57-C58     | -1(3)      |
| C53-C48-C49-C50     | -1.4(15)    | C56-C57-C58-C59     | 1(2)       |
| C47-C48-C49-C50     | 175.5(10)   | C57-C58-C59-C60     | -1(2)      |
| C48-C49-C50-C51     | 0.3(16)     | C58-C59-C60-C55     | 2(2)       |
| C49-C50-C51-C52     | 0.5(14)     | C56-C55-C60-C59     | -1(2)      |
| C50-C51-C52-C53     | -0.2(14)    | C54-C55-C60-C59     | -177.7(14) |
| C51-C52-C53-C48     | -0.9(14)    | C60A-C55A-C56A-C57A | 3(3)       |
| C49-C48-C53-C52     | 1.6(14)     | C54A-C55A-C56A-C57A | -177(2)    |
| C47-C48-C53-C52     | -175.2(9)   | C55A-C56A-C57A-C58A | 0(3)       |
| C53A-C48A-C49A-C50A | 3(4)        | C56A-C57A-C58A-C59A | -3(3)      |
| C47A-C48A-C49A-C50A | 175(2)      | C57A-C58A-C59A-C60A | 4(3)       |
| C48A-C49A-C50A-C51A | 0(4)        | C58A-C59A-C60A-C55A | -1(3)      |
| C49A-C50A-C51A-C52A | -1(3)       | C56A-C55A-C60A-C59A | -3(3)      |
| C50A-C51A-C52A-C53A | -1(3)       | C54A-C55A-C60A-C59A | 177.7(19)  |
| C51A-C52A-C53A-C48A | 4(3)        |                     |            |
| C13-C8-C9-C10       | -3.2(2)     |                     |            |
| <hr/>               |             |                     |            |
| C7-C8-C9-C10        | 177.39(13)  |                     |            |
| C8-C9-C10-C11       | 1.9(2)      |                     |            |
| C8-C9-C10-C17       | -177.48(14) |                     |            |
| C9-C10-C11-C12      | 1.3(2)      |                     |            |
| C17-C10-C11-C12     | -179.23(14) |                     |            |
| C10-C11-C12-N3      | -179.01(14) |                     |            |
| C10-C11-C12-C13     | -3.2(2)     |                     |            |
| C21-N3-C12-C11      | -4.7(2)     |                     |            |
| C21-N3-C12-C13      | 179.36(13)  |                     |            |
| C9-C8-C13-N2        | -178.06(13) |                     |            |
| C7-C8-C13-N2        | 1.3(2)      |                     |            |
| C9-C8-C13-C12       | 1.3(2)      |                     |            |
| C7-C8-C13-C12       | -179.33(12) |                     |            |
| C1-N2-C13-C8        | -11.7(2)    |                     |            |
| C1-N2-C13-C12       | 168.89(12)  |                     |            |
| C11-C12-C13-C8      | 1.8(2)      |                     |            |
| N3-C12-C13-C8       | 177.90(13)  |                     |            |
| C11-C12-C13-N2      | -178.77(13) |                     |            |
| N3-C12-C13-N2       | -2.68(19)   |                     |            |
| C2-N1-C18-C19       | 156.80(13)  |                     |            |
| C2-N1-C18-C20       | -82.23(17)  |                     |            |
| C12-N3-C21-C23      | 166.78(14)  |                     |            |
| C12-N3-C21-C22      | -70.04(18)  |                     |            |
| C18-N1-C2-C3        | 7.9(2)      |                     |            |
| C18-N1-C2-C1        | -173.50(13) |                     |            |
| C6-C1-C2-C3         | -3.5(2)     |                     |            |
| N2-C1-C2-C3         | 179.05(13)  |                     |            |
| C6-C1-C2-N1         | 177.88(12)  |                     |            |
| N2-C1-C2-N1         | 0.40(19)    |                     |            |
| N1-C2-C3-C4         | -179.76(14) |                     |            |
| C1-C2-C3-C4         | 1.7(2)      |                     |            |
| C6-C5-C4-C3         | -2.4(2)     |                     |            |
| C6-C5-C4-C14        | 178.07(15)  |                     |            |
| C2-C3-C4-C5         | 1.2(2)      |                     |            |
| C2-C3-C4-C14        | -179.25(15) |                     |            |

Bonds to hydrogen atoms were omitted.

**Table S10.** Comparison of Ta–N bond lengths and bond lengths within the NNN pincer ligand for Ta complexes with different ligand oxidation states.

| Bond length    | Ligand in catecholate form |            | Ligand in semiquinone form |          | Ligand in quinone form |
|----------------|----------------------------|------------|----------------------------|----------|------------------------|
|                | I                          | 4          | II                         | 5        | 3                      |
| <b>Ta1–N1</b>  | 2.001(3)                   | 2.0080(19) | 2.042(2)                   | 2.028(3) | 2.158(3)               |
| <b>Ta1–N2</b>  | 2.037(2)                   | 2.0316(19) | 2.161(2)                   | 2.136(4) | 2.218(2)               |
| <b>Ta1–N3</b>  | 1.992(3)                   | 2.0138(19) | 2.043(2)                   | 2.025(3) | 2.153(2)               |
| <b>N1–C2</b>   | 1.403(5)                   | 1.400(3)   | 1.371(5)                   | 1.380(4) | 1.346(3)               |
| <b>C2–C1</b>   | 1.399(4)                   | 1.400(3)   | 1.408(6)                   | 1.418(3) | 1.451(4)               |
| <b>C1–N2</b>   | 1.389(4)                   | 1.394(3)   | 1.361(5)                   | 1.356(4) | 1.323(4)               |
| <b>N2–C13</b>  | 1.391(4)                   | 1.390(3)   | 1.362(5)                   | 1.352(3) | 1.388(4)               |
| <b>C13–C12</b> | 1.399(4)                   | 1.406(3)   | 1.422(6)                   | 1.420(4) | 1.439(4)               |
| <b>C12–N3</b>  | 1.401(4)                   | 1.390(3)   | 1.373(6)                   | 1.366(3) | 1.353(3)               |

## Computational Details

**Table S11.** Calculated free Gibbs energies of complexes, the hydrogen atom and the free energies for comproportionation of **1** and **3** to give **2**.

| Compound                                    | Free Gibbs energy in kcal/mol |              |
|---------------------------------------------|-------------------------------|--------------|
|                                             | Gas phase                     | benzene      |
| <b>1</b>                                    | -1457251.043                  | -1457257.926 |
| <b>2</b>                                    | -1456861.983                  | -1456868.798 |
| <b>2_eq</b>                                 | -1456861.155                  | -1456867.561 |
| <b>3</b>                                    | -1456480.017                  | -1456488.033 |
| Hydrogen atom                               | -319.196                      | -319.251     |
| Comproportionation of <b>1</b> and <b>3</b> | 7.09                          | 8.36         |

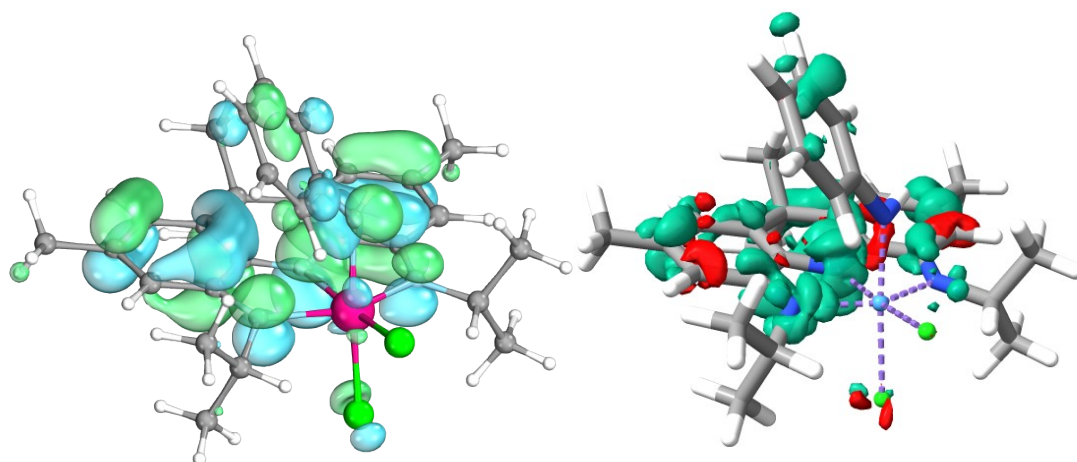

**Figure S36.** Calculated SOMO and spin density of **2**.

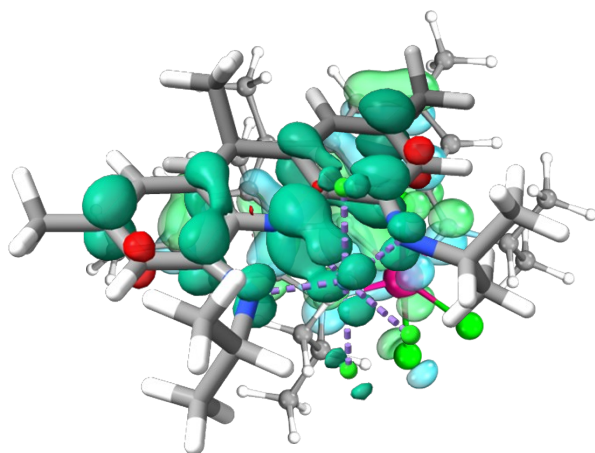

**Figure S37.** Calculated SOMO and spin density of **4**.

To determine the bond dissociation free energies of the N–H bonds of **1** and **2** the following reaction energies were calculated in the gas phase and in benzene

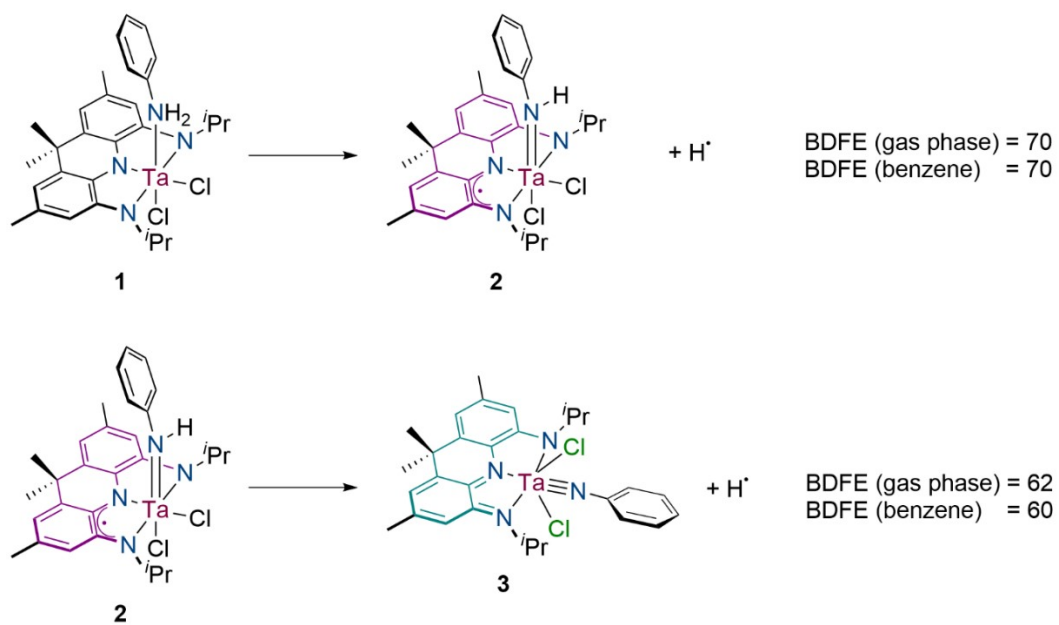

**Figure S38.** Calculated bond dissociation free energies of **1** and **2**.

## References

- [1] F. You, J. Zhai, Y.-M. So and X. Shi, *Inorg. Chem.*, 2021, **60**, 1797–1805.
- [2] E. W. Y. Wong and D. J. H. Emslie, *Dalton Trans.*, 2015, **44**, 11601–11612.
- [3] J. Underhill, E. S. Yang, T. Schmidt-Räntsch, W. K. Myers, J. M. Goicoechea and J. Abbenseth, *Chem. Eur. J.*, 2023, **29**, e202203266.
- [4] A. J. King, J. Abbenseth and J. Goicoechea, *Chem. Eur. J.*, 2023, **29**, e202300818.
- [5] H. Liu, N.-D. Wang and D.-M. Du, *Lett. Org. Chem.*, 2010, **7**, 114–120.
